# Supplementary material for: A comprehensive assessment of the association between common drugs and psychiatric disorders using Mendelian randomization and real-world pharmacovigilance database
Source: PubMed Central journal article supplement — eBioMedicine. 2024 Aug 26;107:105314. doi: 10.1016/j.ebiom.2024.105314 (PMC11400609; doi:10.1016/j.ebiom.2024.105314), 2024-08-26

MR Test

- Inverse variance weighted
- MR Egger
- Weighted median
- Weighted mode

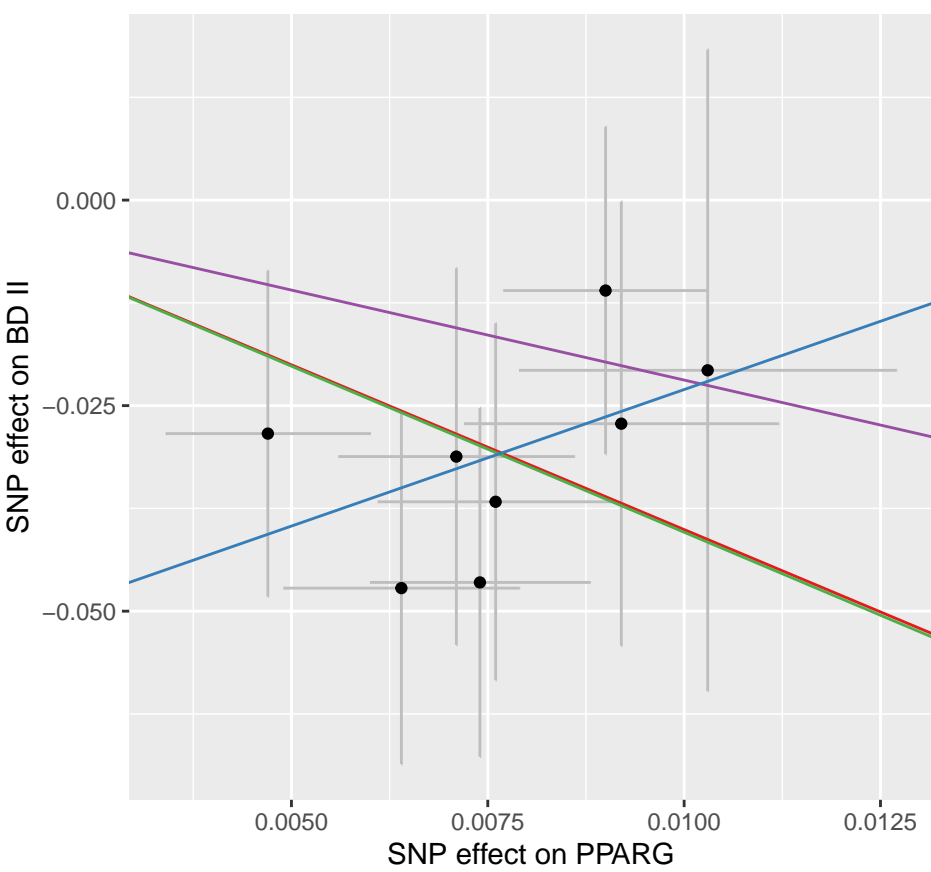

MR Test

- Inverse variance weighted
- MR Egger
- Weighted median
- Weighted mode

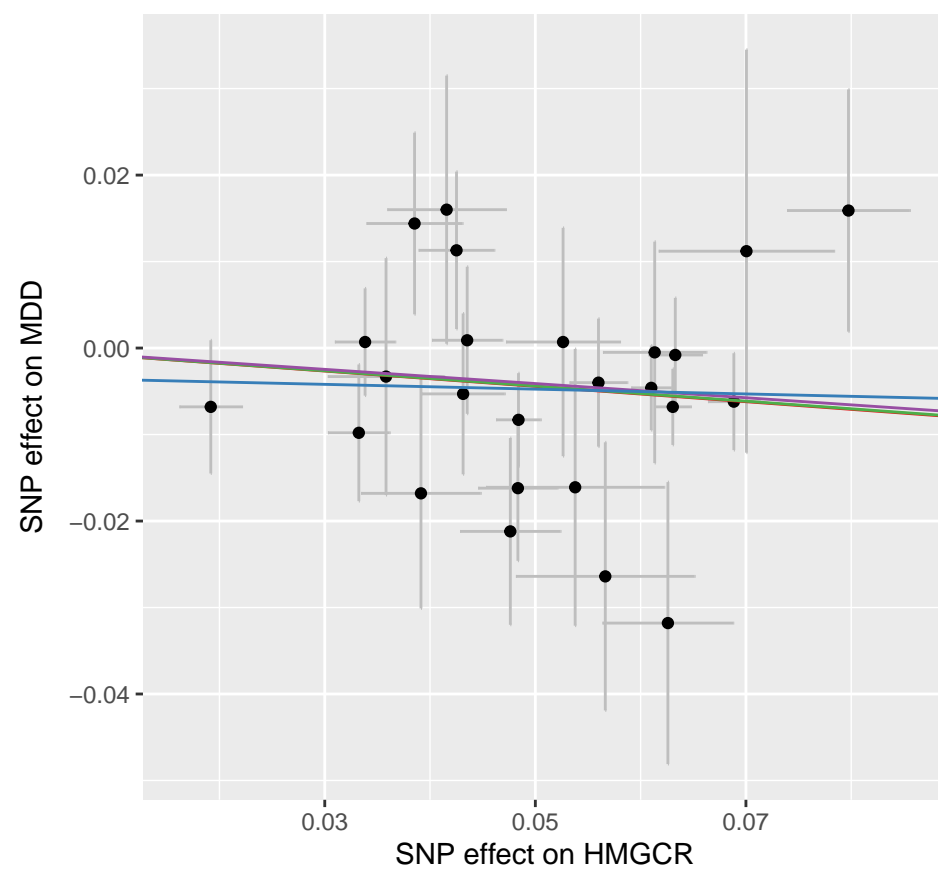

MR Test

- Inverse variance weighted
- MR Egger
- Weighted median
- Weighted mode

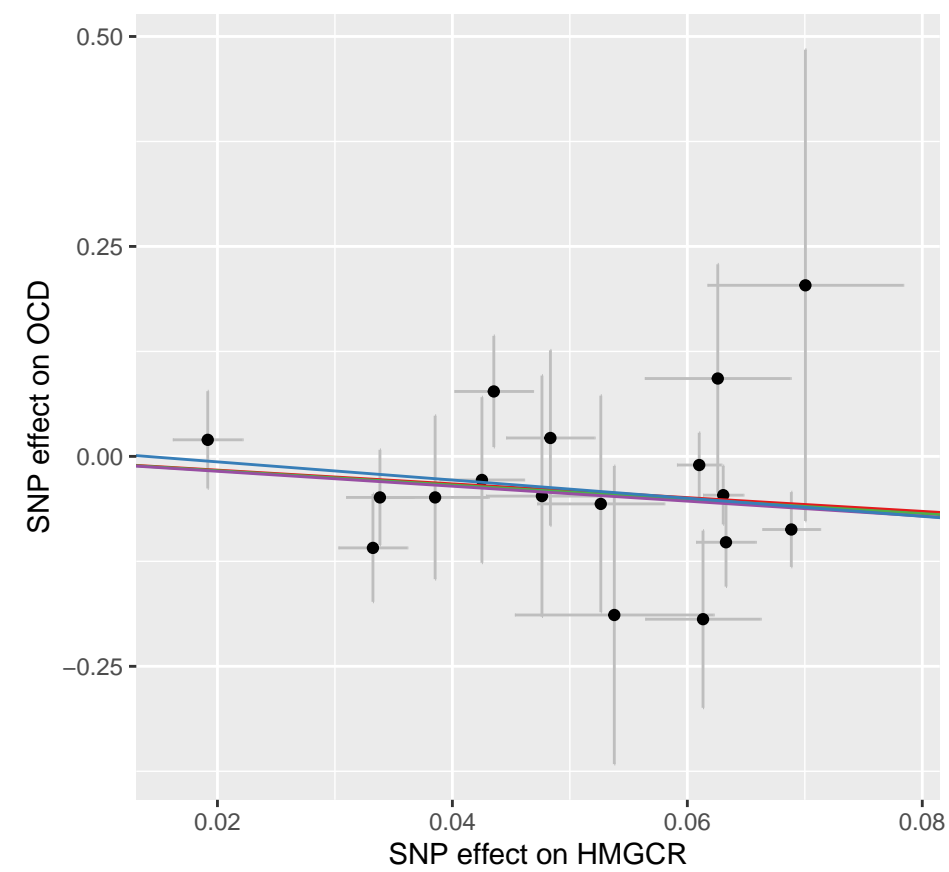

MR Test

- Inverse variance weighted
- MR Egger
- Weighted median
- Weighted mode

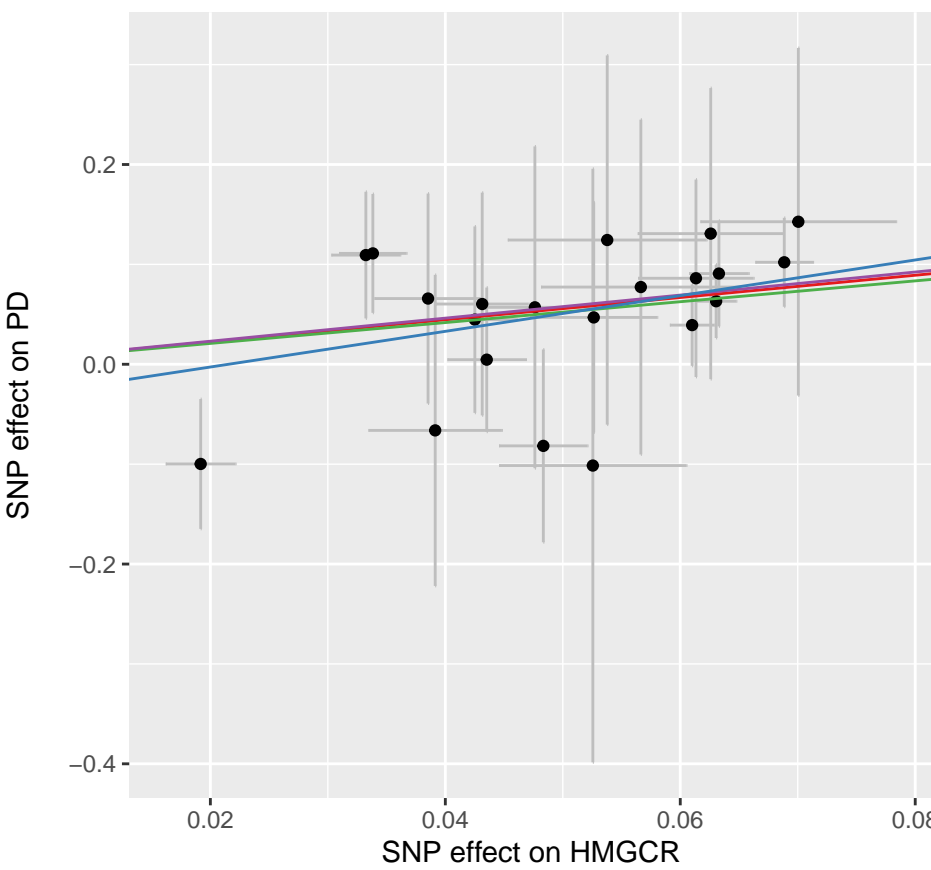

MR Test

- Inverse variance weighted
- MR Egger
- Weighted median
- Weighted mode

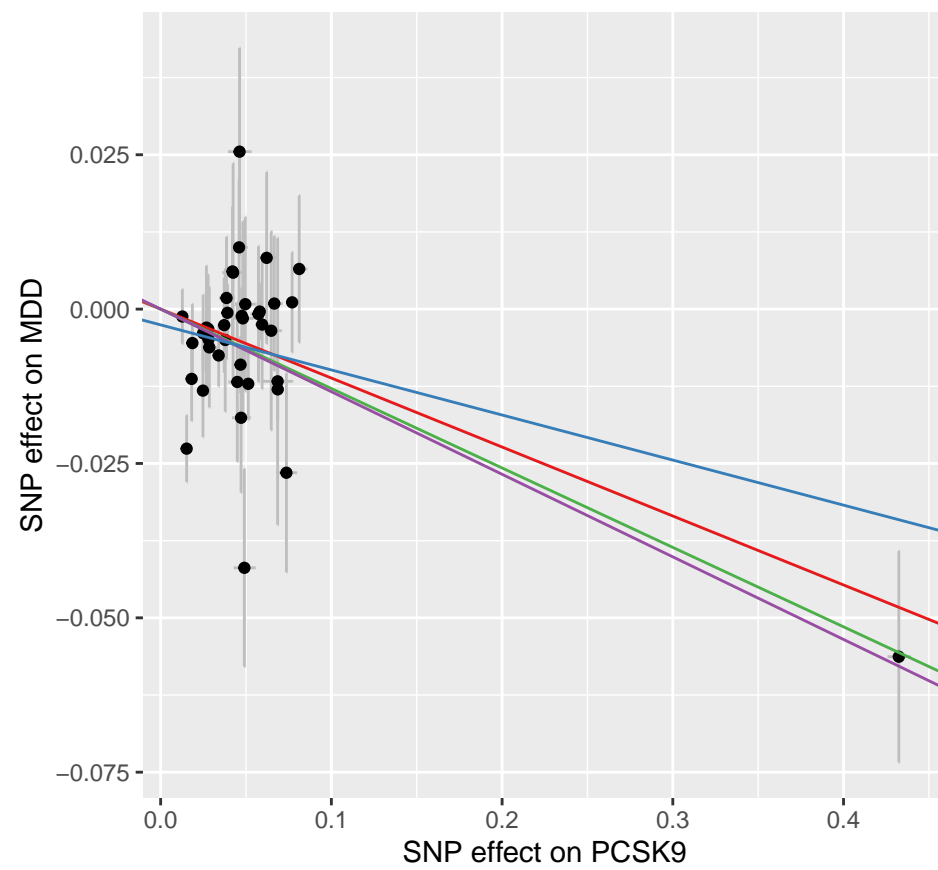

MR Test

- Inverse variance weighted
- MR Egger
- Weighted median
- Weighted mode

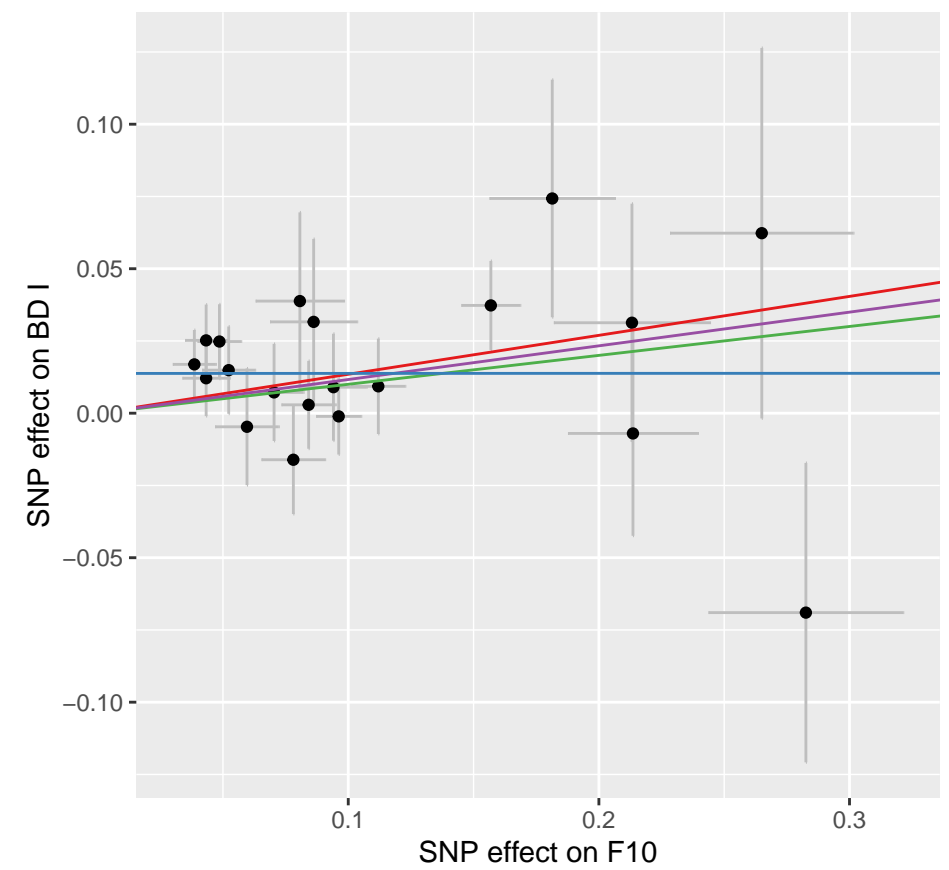

MR Test

- Inverse variance weighted
- MR Egger
- Weighted median
- Weighted mode

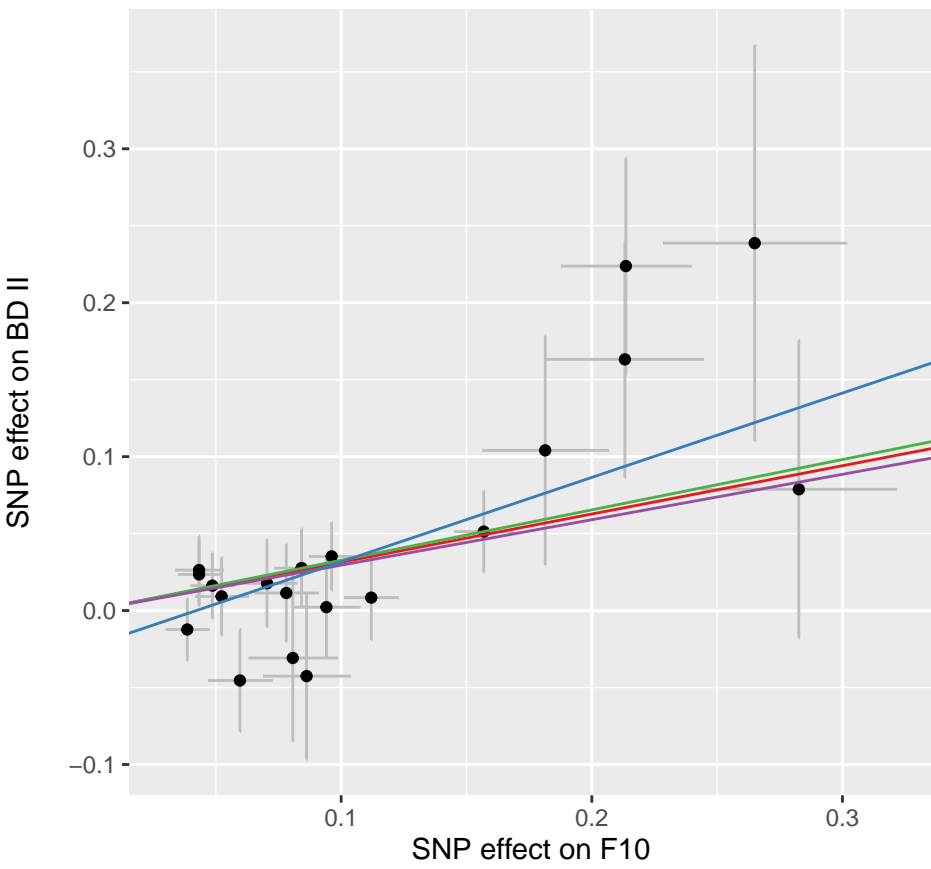

Supplement: mmc1.pdf [file mmc1.pdf]
