# Supplementary material for: A comprehensive assessment of the association between common drugs and psychiatric disorders using Mendelian randomization and real-world pharmacovigilance database
Source: PubMed Central journal article supplement — eBioMedicine. 2024 Aug 26;107:105314. doi: 10.1016/j.ebiom.2024.105314 (PMC11400609; doi:10.1016/j.ebiom.2024.105314), 2024-08-26
Supplement: mmc2.pdf [file mmc2.pdf]

MR Method  
Inverse variance weighted  
MR Egger

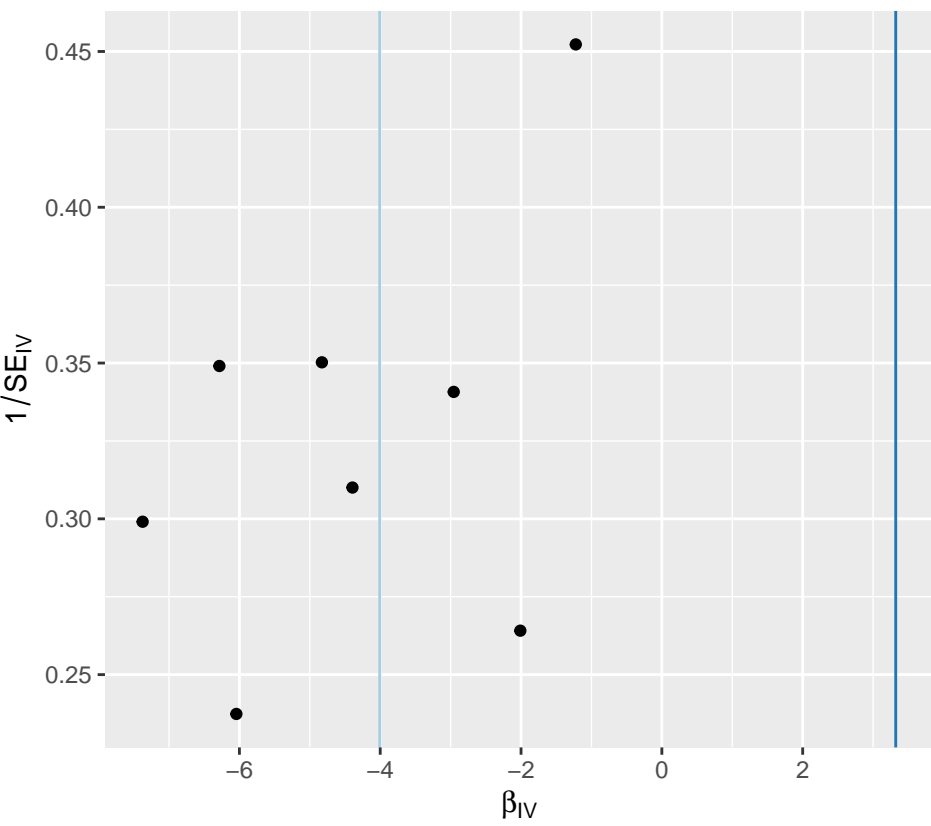

Funnel plot for PPARG on BD II

MR Method  
Inverse variance weighted  
MR Egger

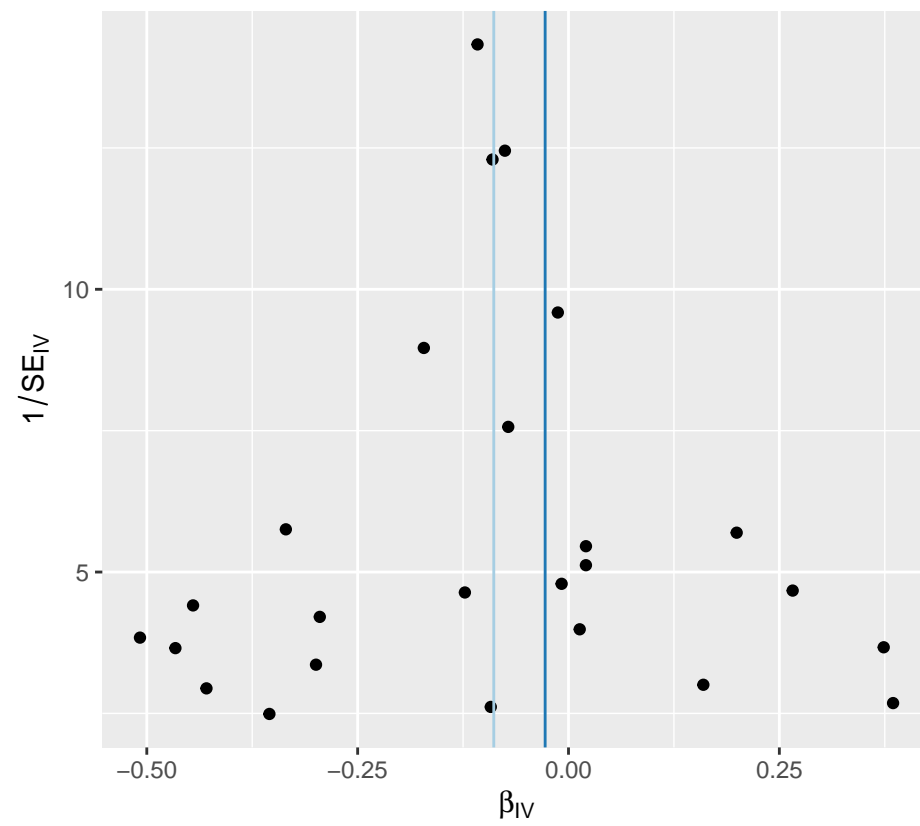

Funnel plot for HMGCR on MDD

MR Method  
Inverse variance weighted  
MR Egger

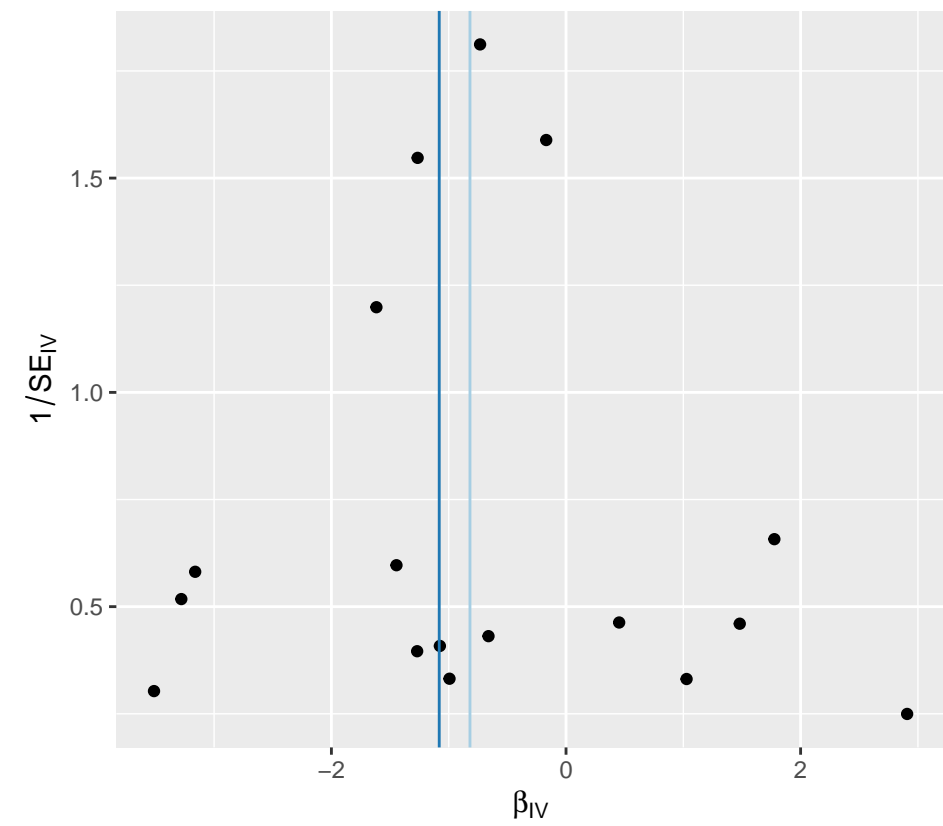

Funnel plot for HMGCR on OCD

MR Method  
Inverse variance weighted  
MR Egger

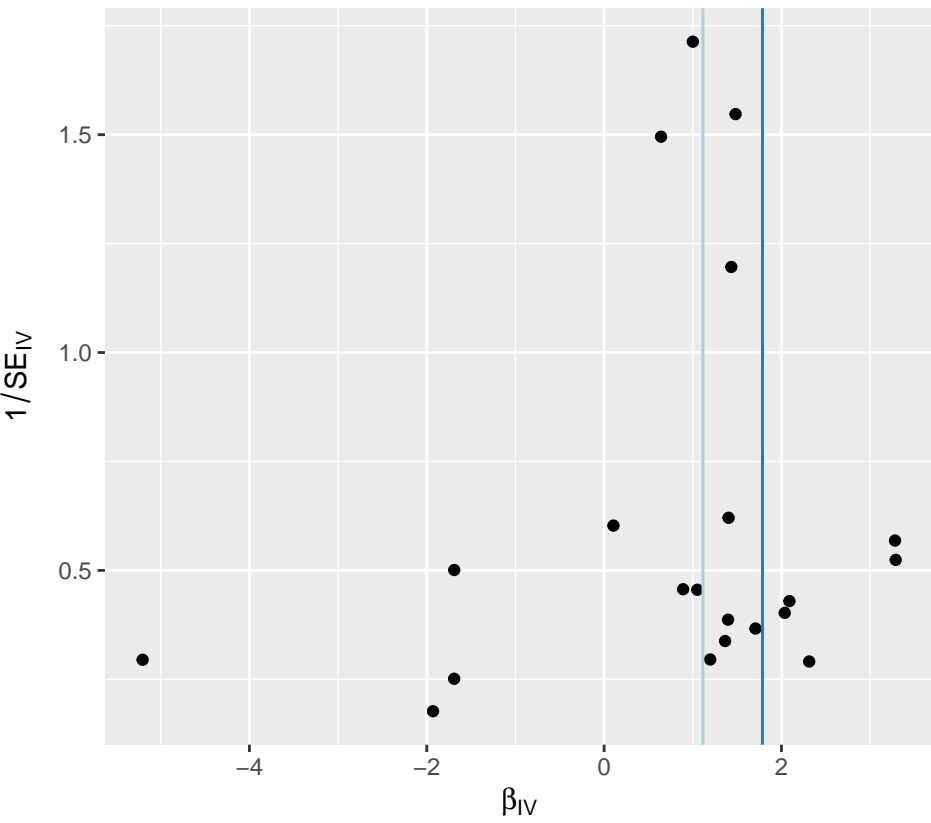

Funnel plot for HMGCR on PD

MR Method  
Inverse variance weighted  
MR Egger

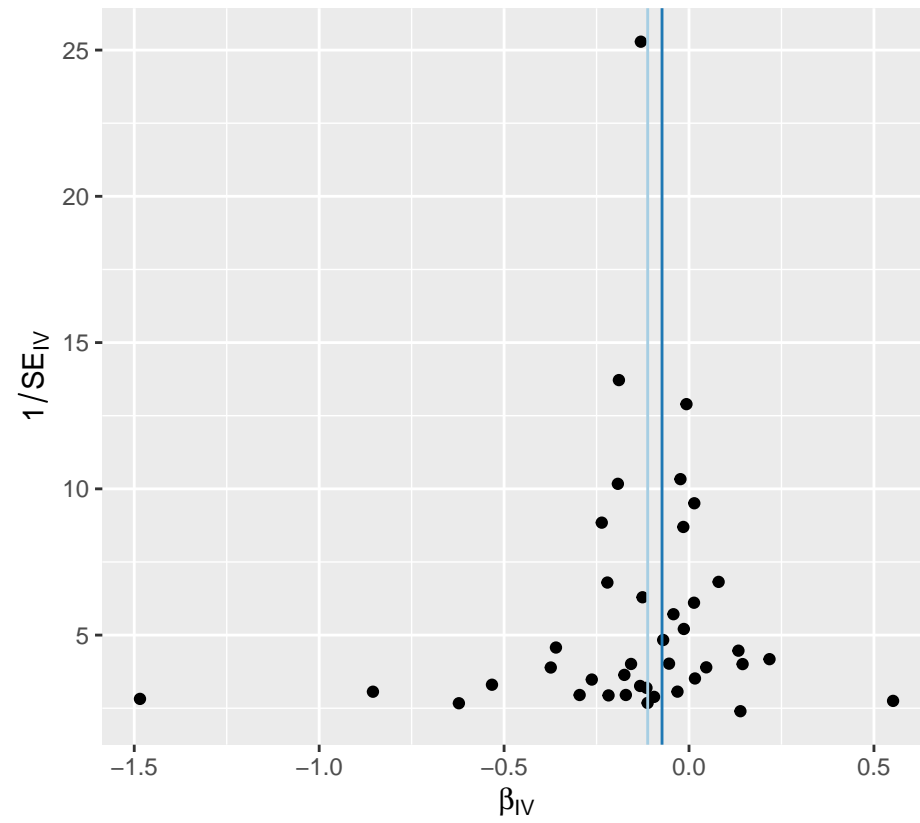

Funnel plot for PCSK9 on MDD

MR Method  
Inverse variance weighted  
MR Egger

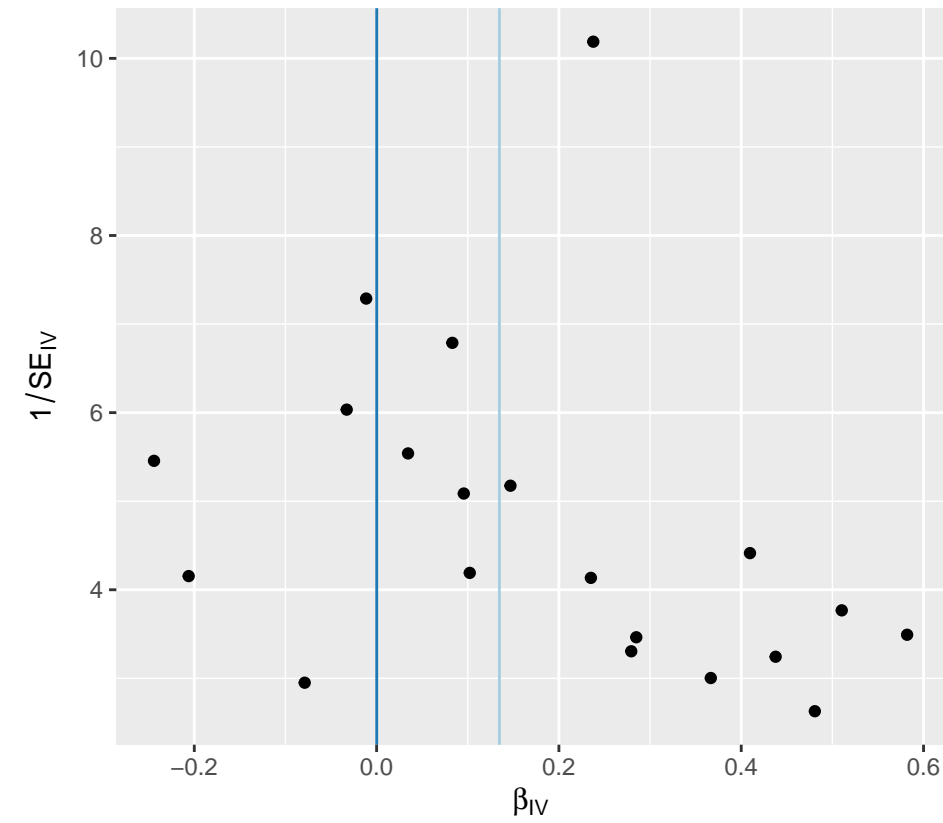

Funnel plot for F10 on BD I

MR Method  
Inverse variance weighted  
MR Egger

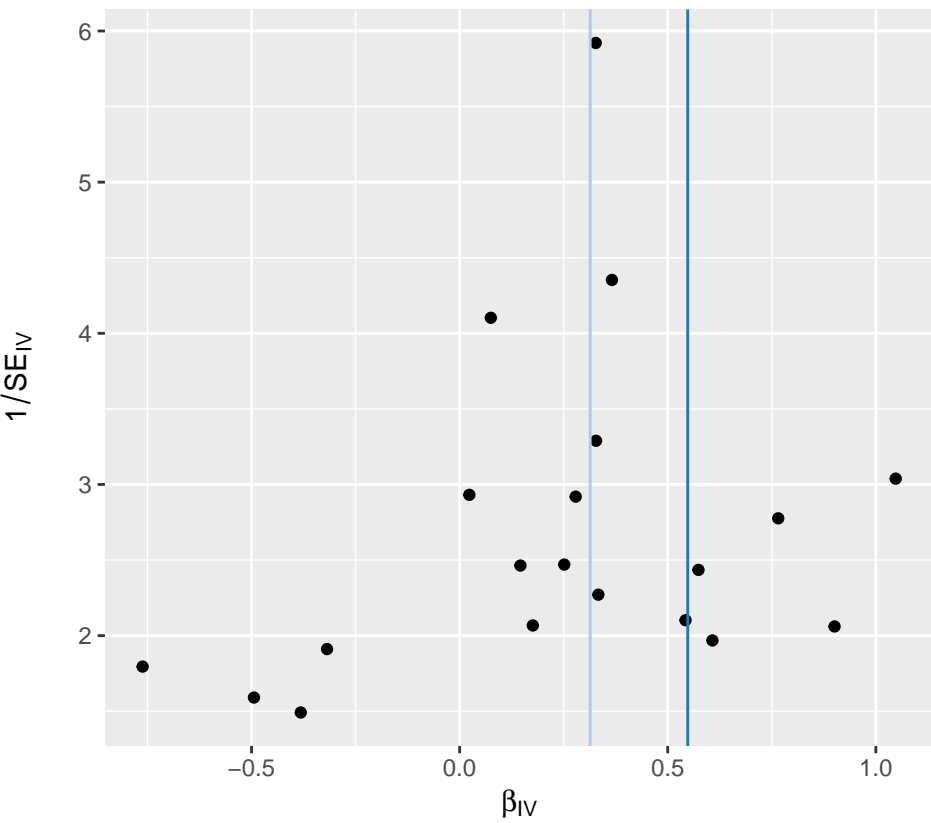

Funnel plot for F10 on BD II
