# Supplementary material for: A comprehensive assessment of the association between common drugs and psychiatric disorders using Mendelian randomization and real-world pharmacovigilance database
Source: PubMed Central journal article supplement — eBioMedicine. 2024 Aug 26;107:105314. doi: 10.1016/j.ebiom.2024.105314 (PMC11400609; doi:10.1016/j.ebiom.2024.105314), 2024-08-26
Supplement: mmc11.pdf [file mmc11.pdf]

MR Method  
Inverse variance weighted  
MR Egger

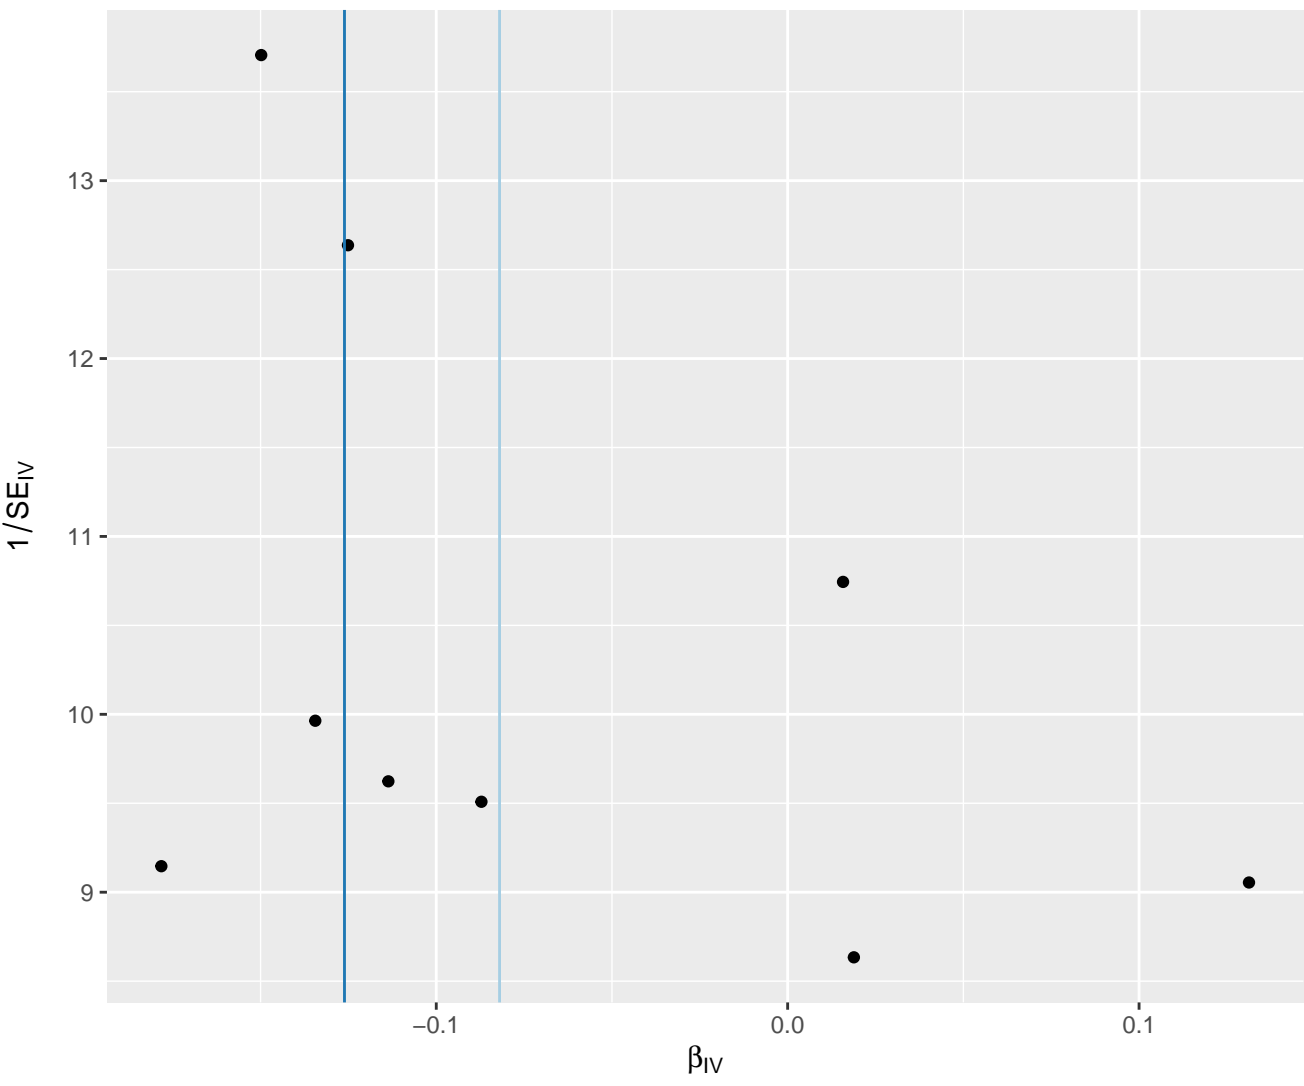

Funnel plot for genus.Haemophilus on ThalamNuclei\_rh\_volume\_MDI

MR Method  
Inverse variance weighted  
MR Egger

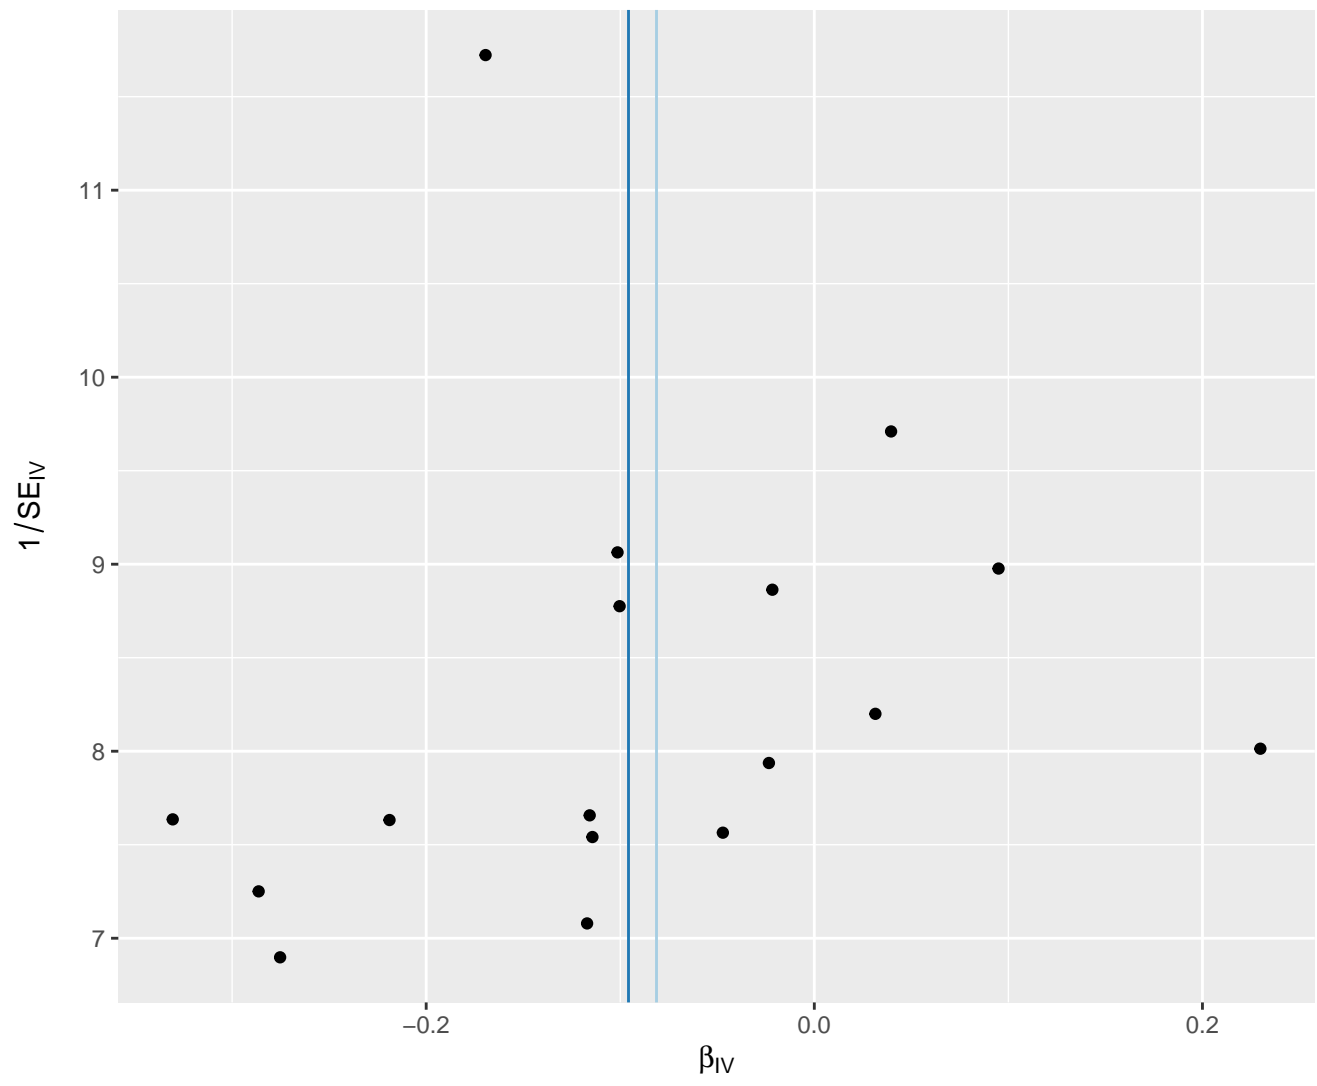

Funnel plot for genus.Intestinimonas on aparc-Desikan\_rh\_thickness\_parsopercularis

MR Method  
Inverse variance weighted  
MR Egger

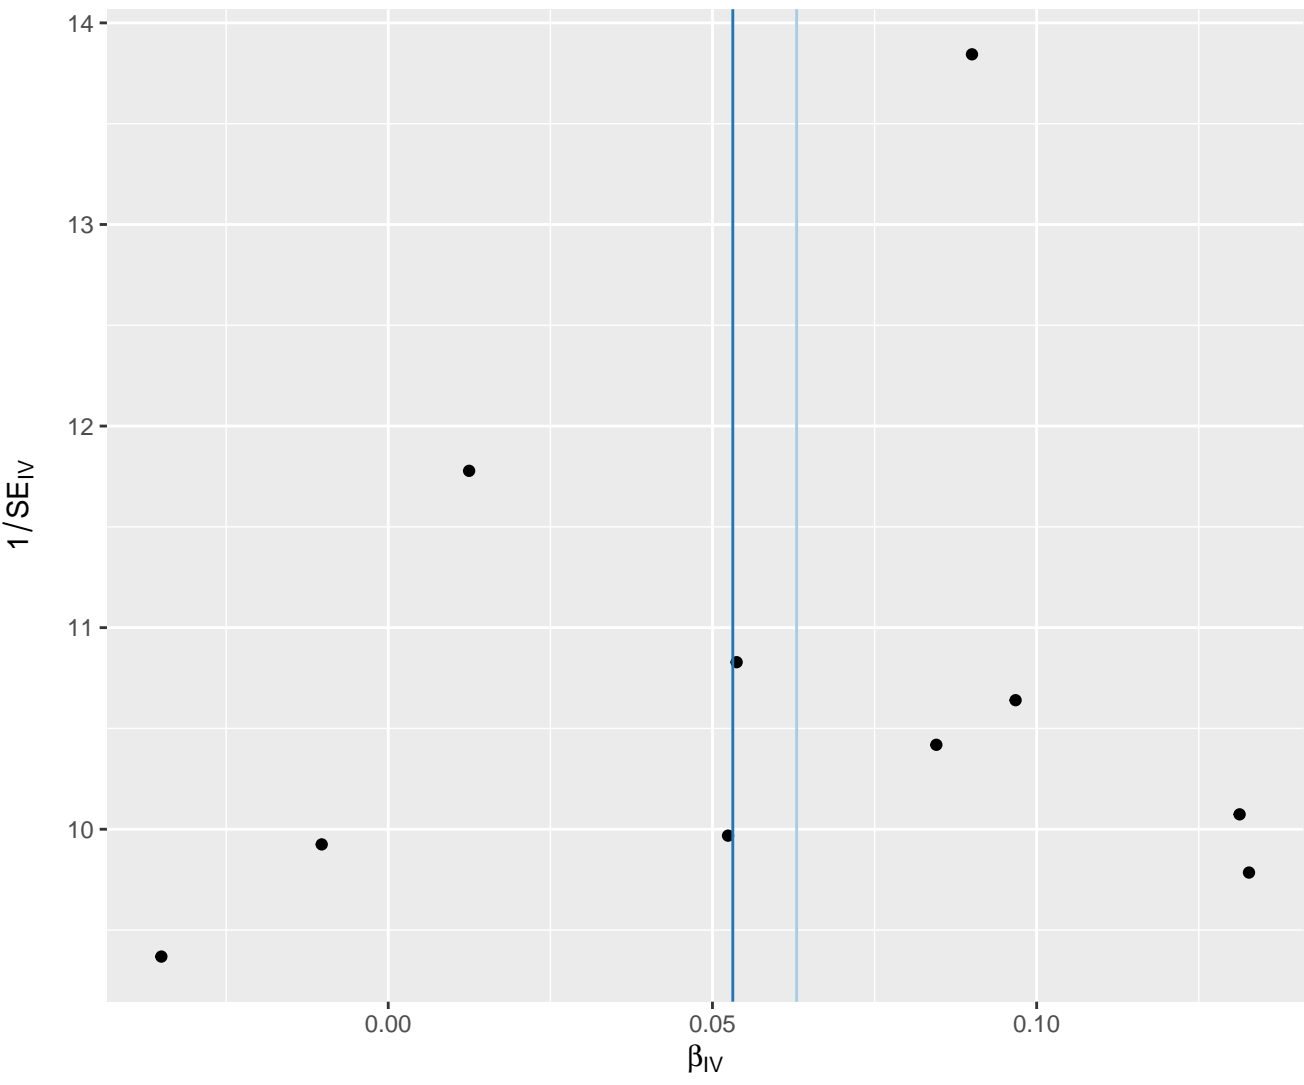

Funnel plot for genus.Lactobacillus on ThalamNuclei\_rh\_volume\_LGN

MR Method  
Inverse variance weighted  
MR Egger

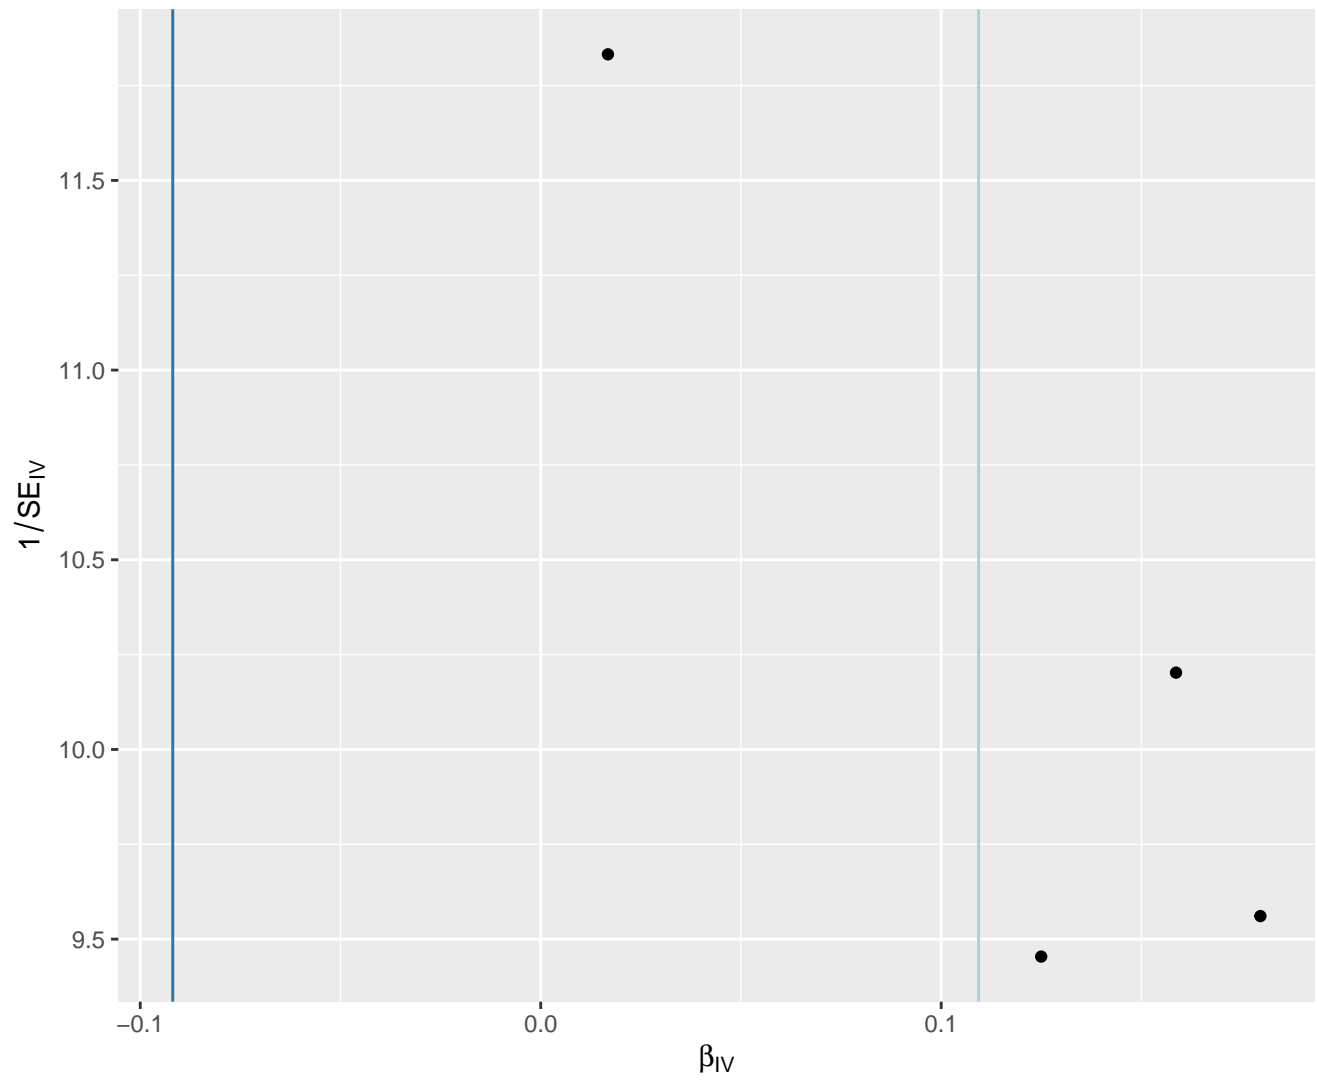

Funnel plot for genus.Senegalimassilia on aparc-Desikan\_lh\_area\_inferiorparietal

MR Method  
Inverse variance weighted  
MR Egger

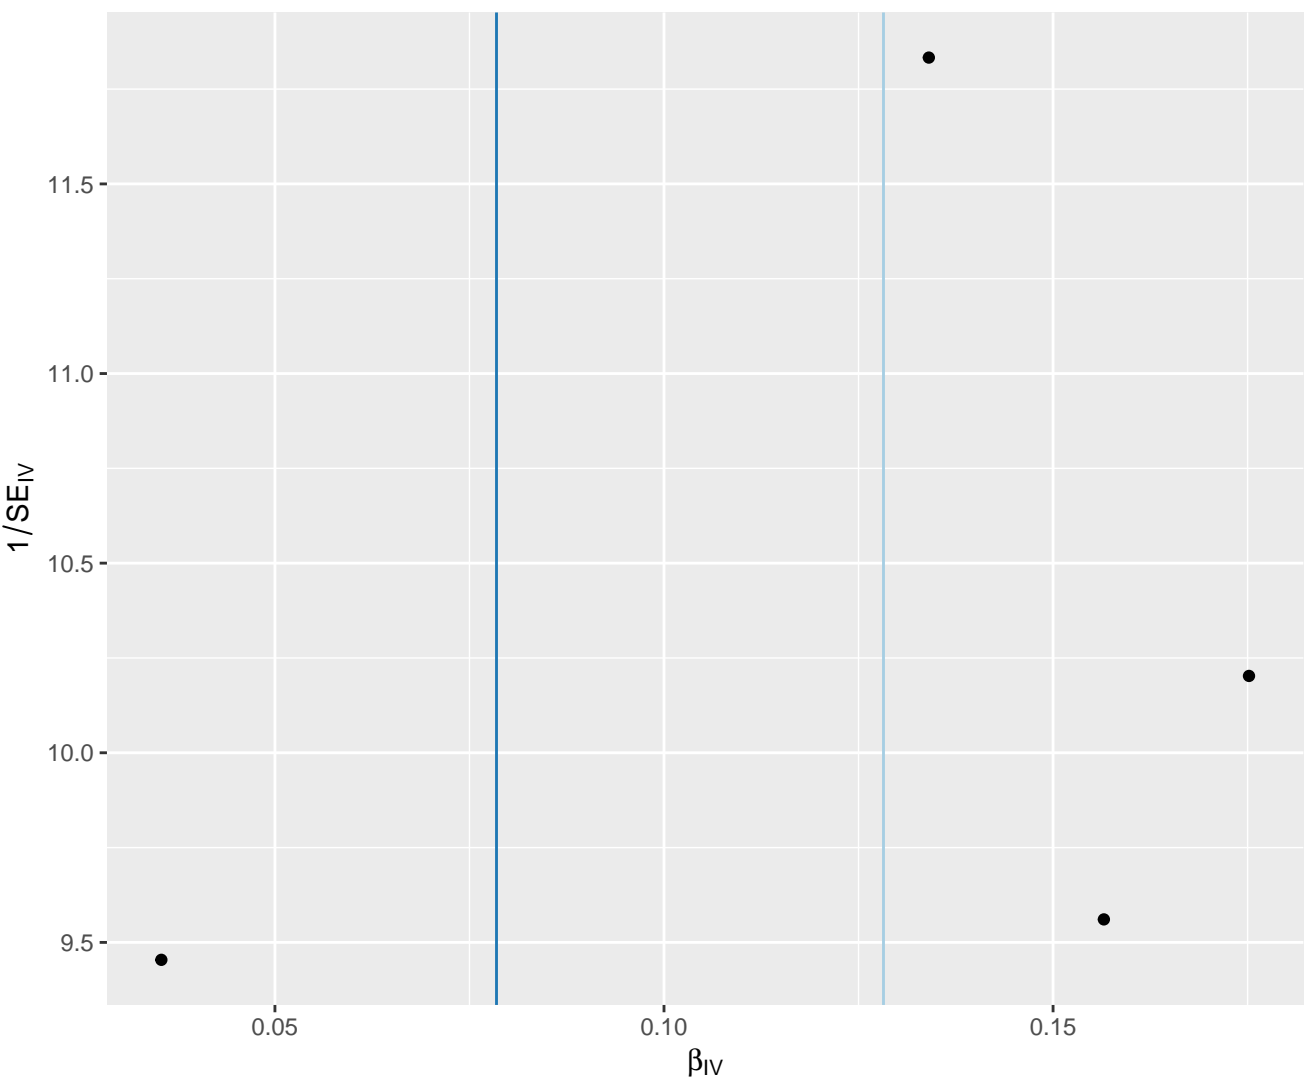

Funnel plot for genus.Senegalimassilia on aparc-Desikan\_rh\_area\_supramarginal
