# Supplementary figures and images for: A comprehensive assessment of the association between common drugs and psychiatric disorders using Mendelian randomization and real-world pharmacovigilance database
Source: PubMed Central journal article supplement — eBioMedicine. 2024 Aug 26;107:105314. doi: 10.1016/j.ebiom.2024.105314 (PMC11400609; doi:10.1016/j.ebiom.2024.105314), 2024-08-26

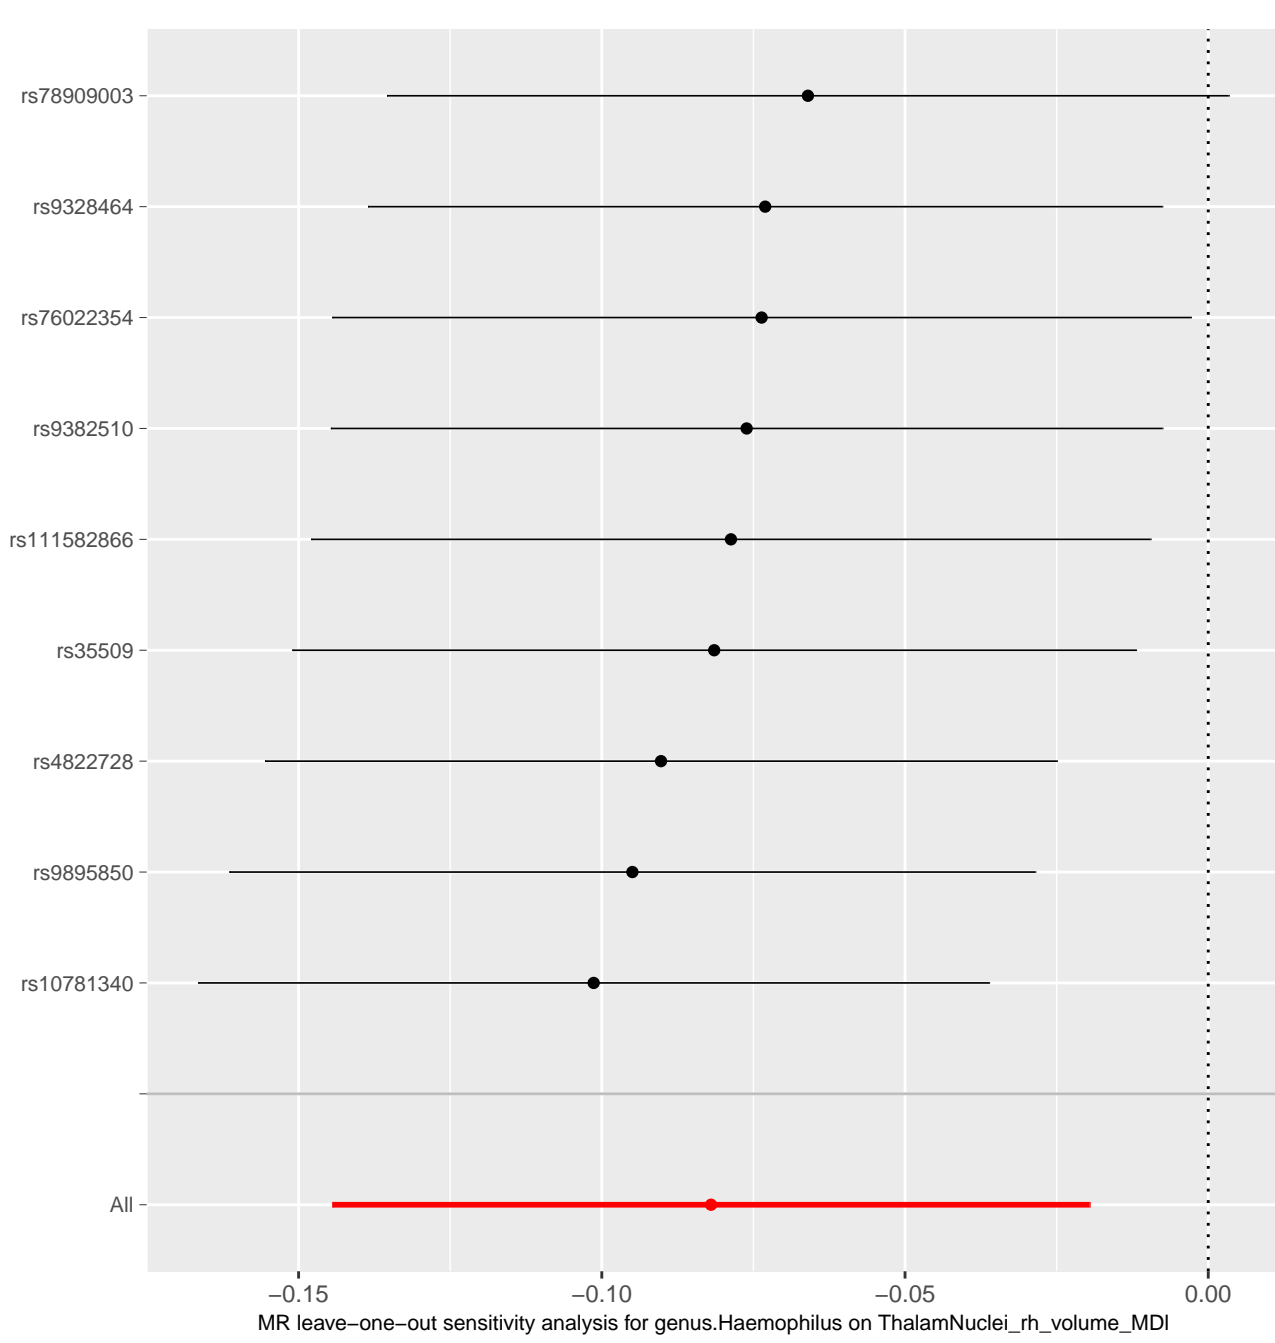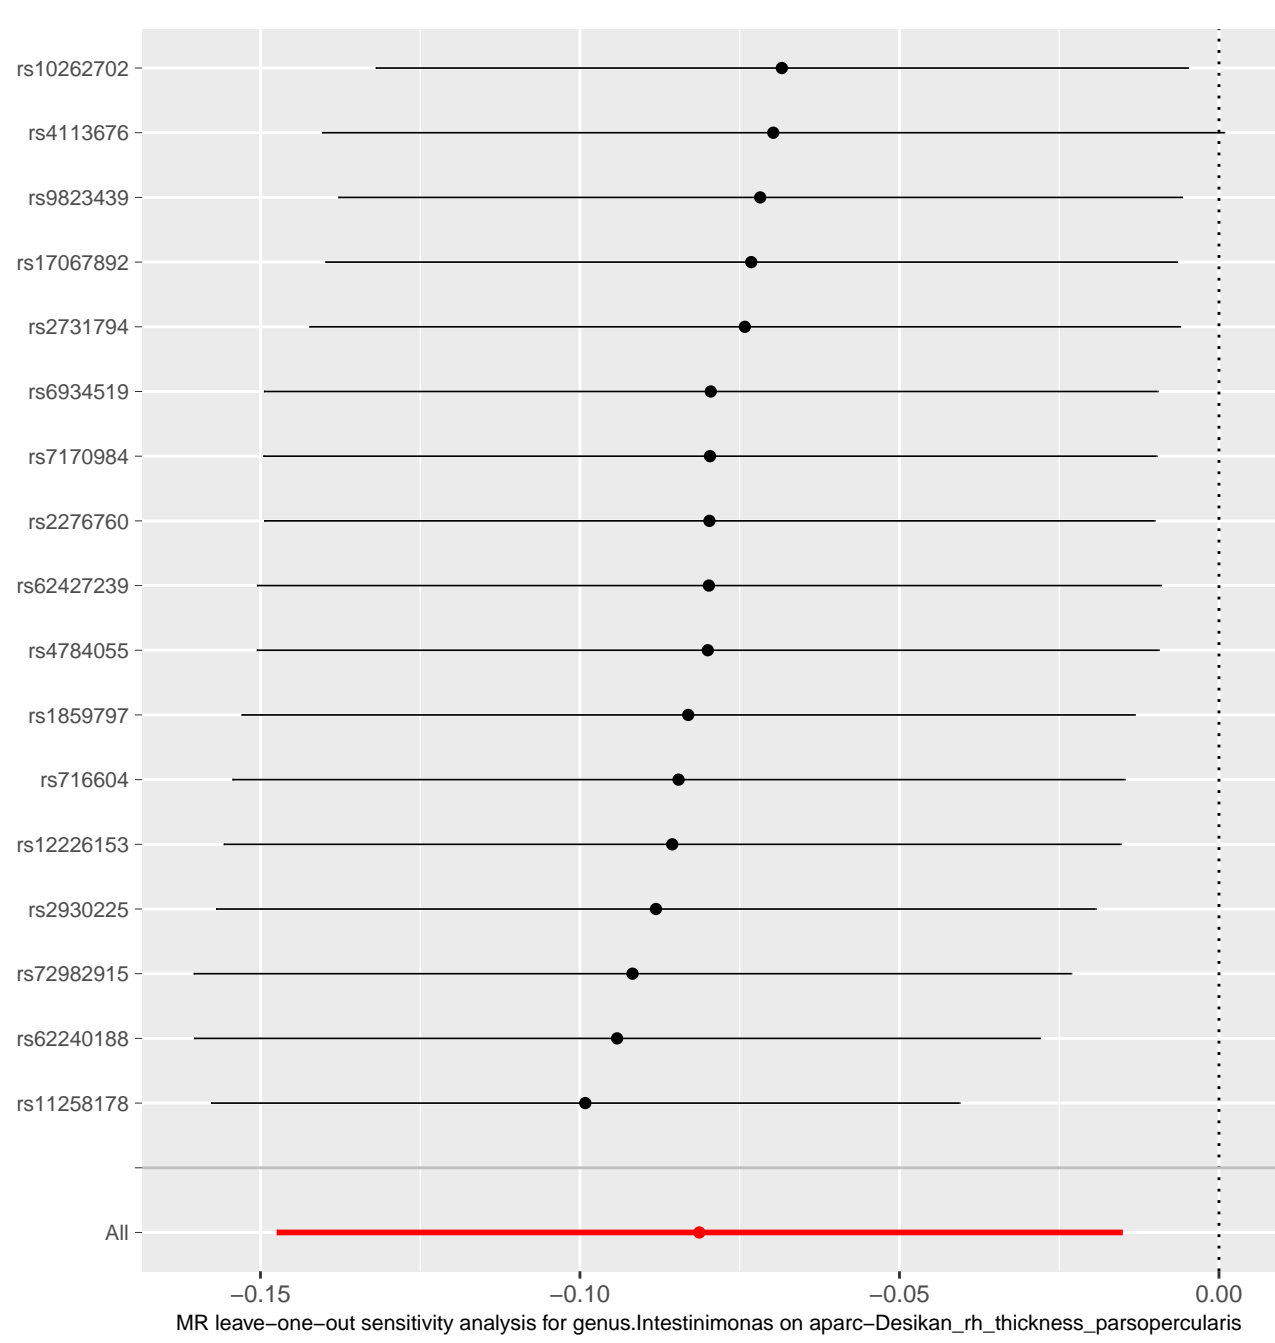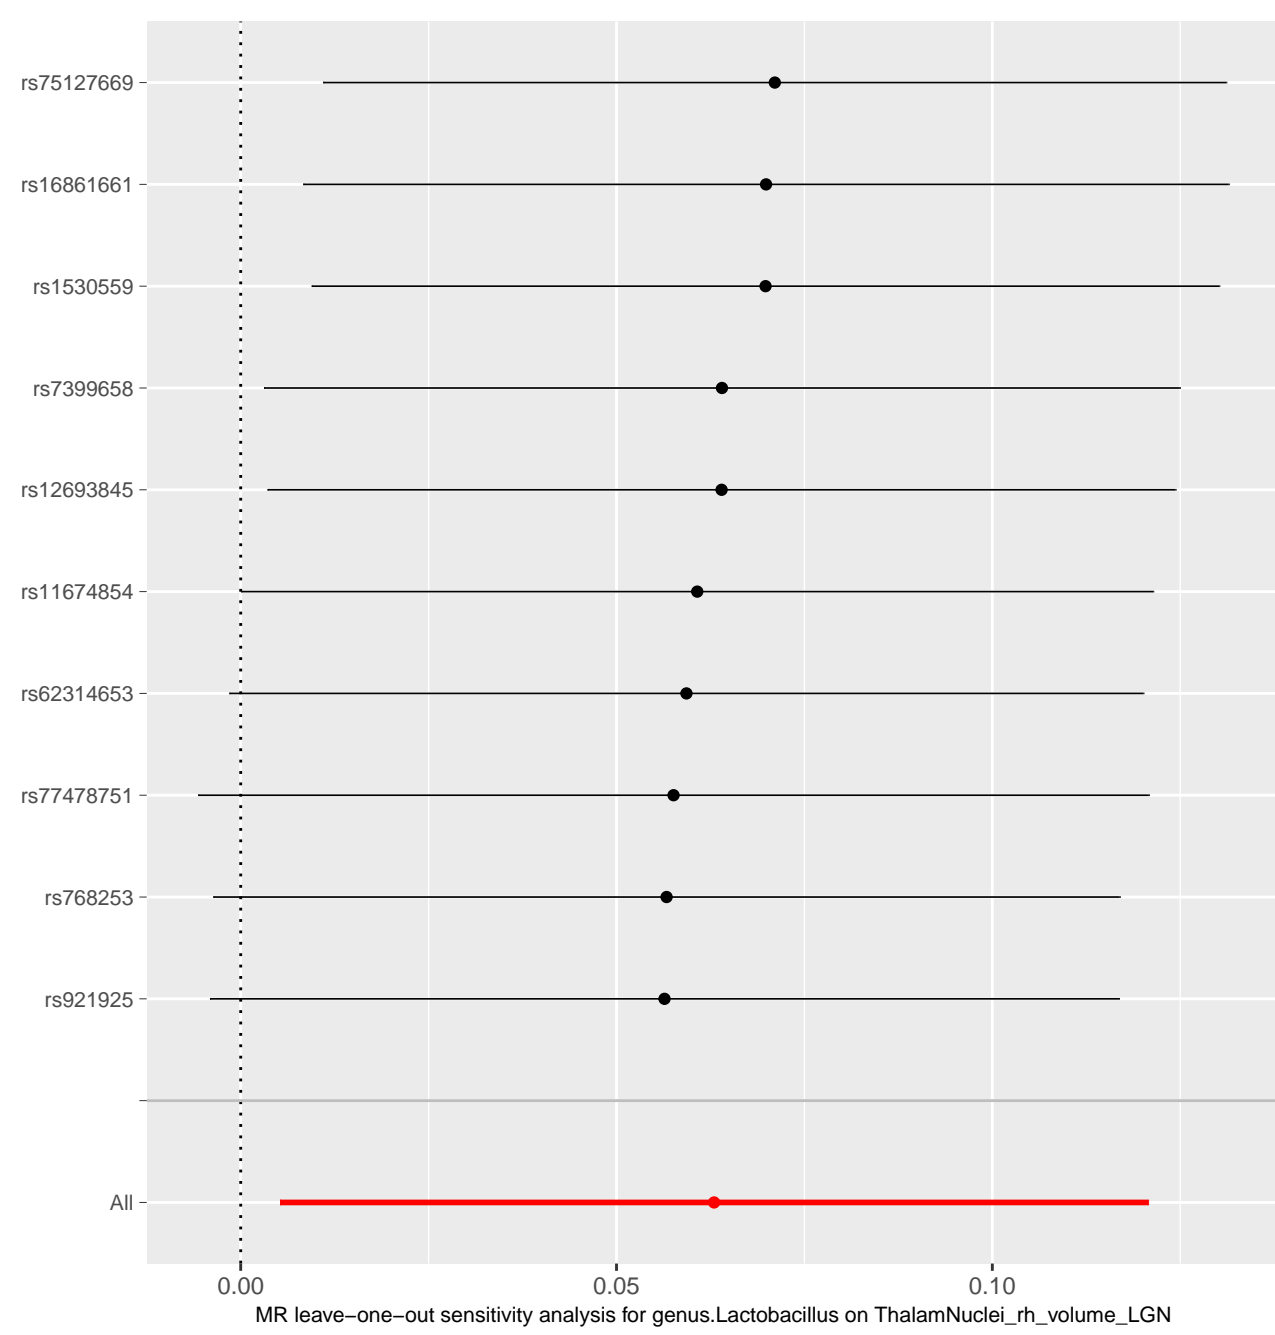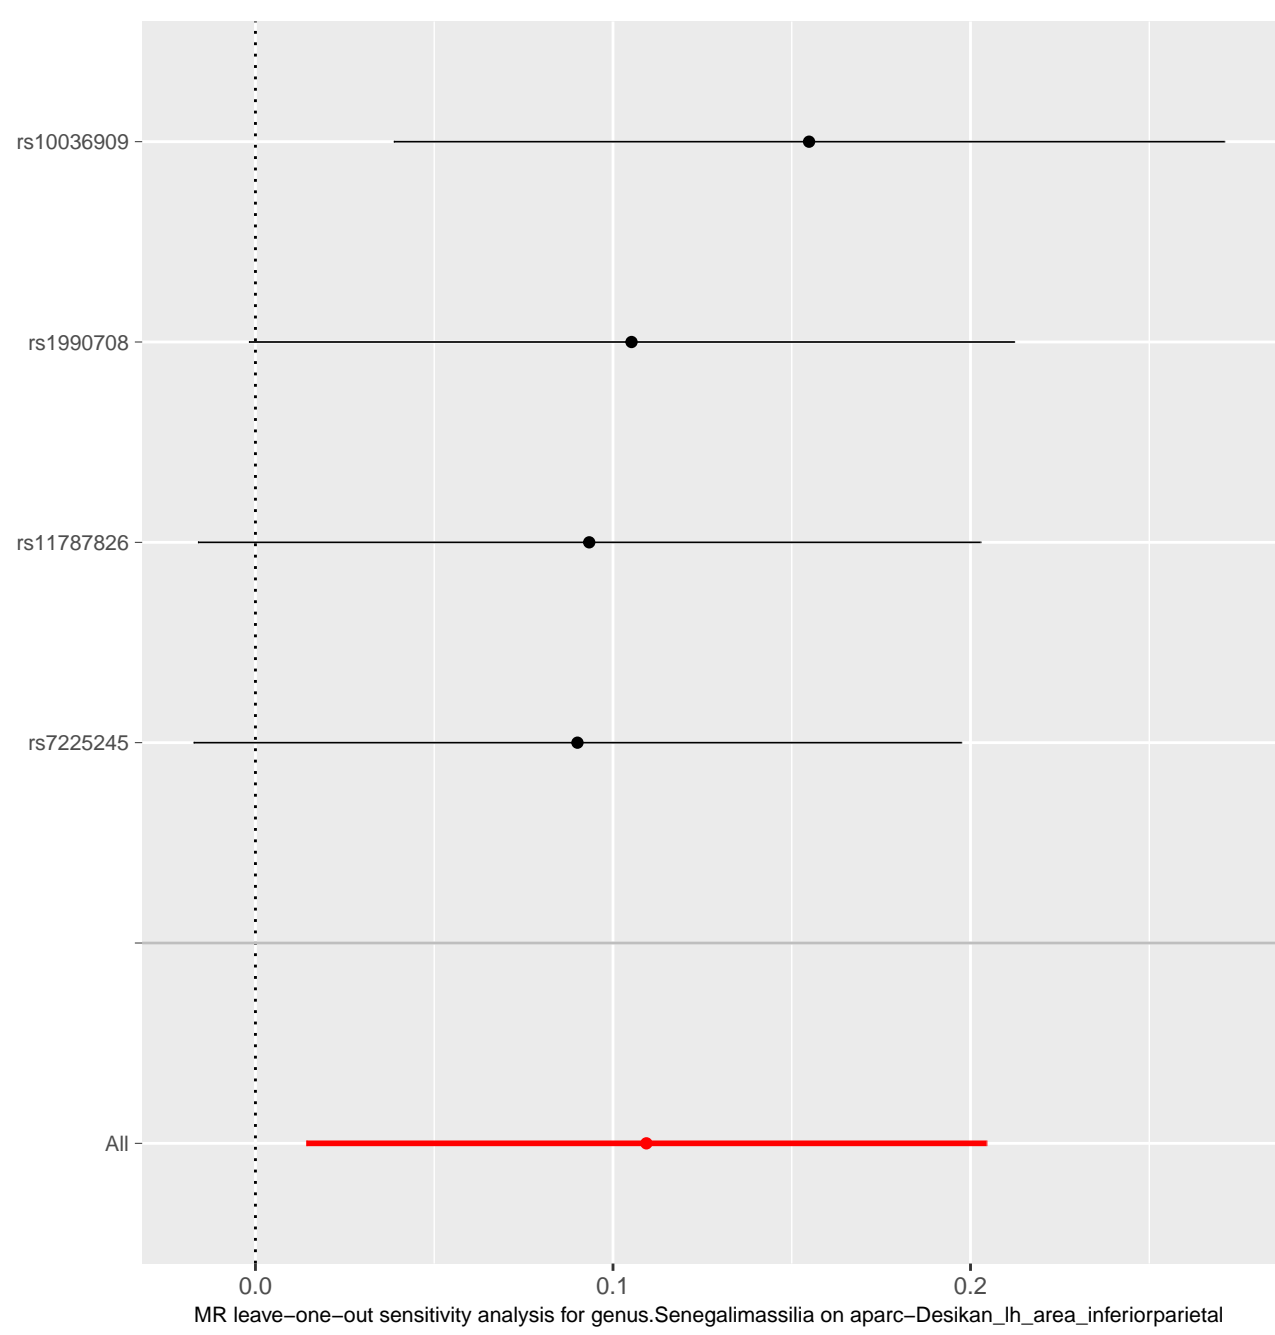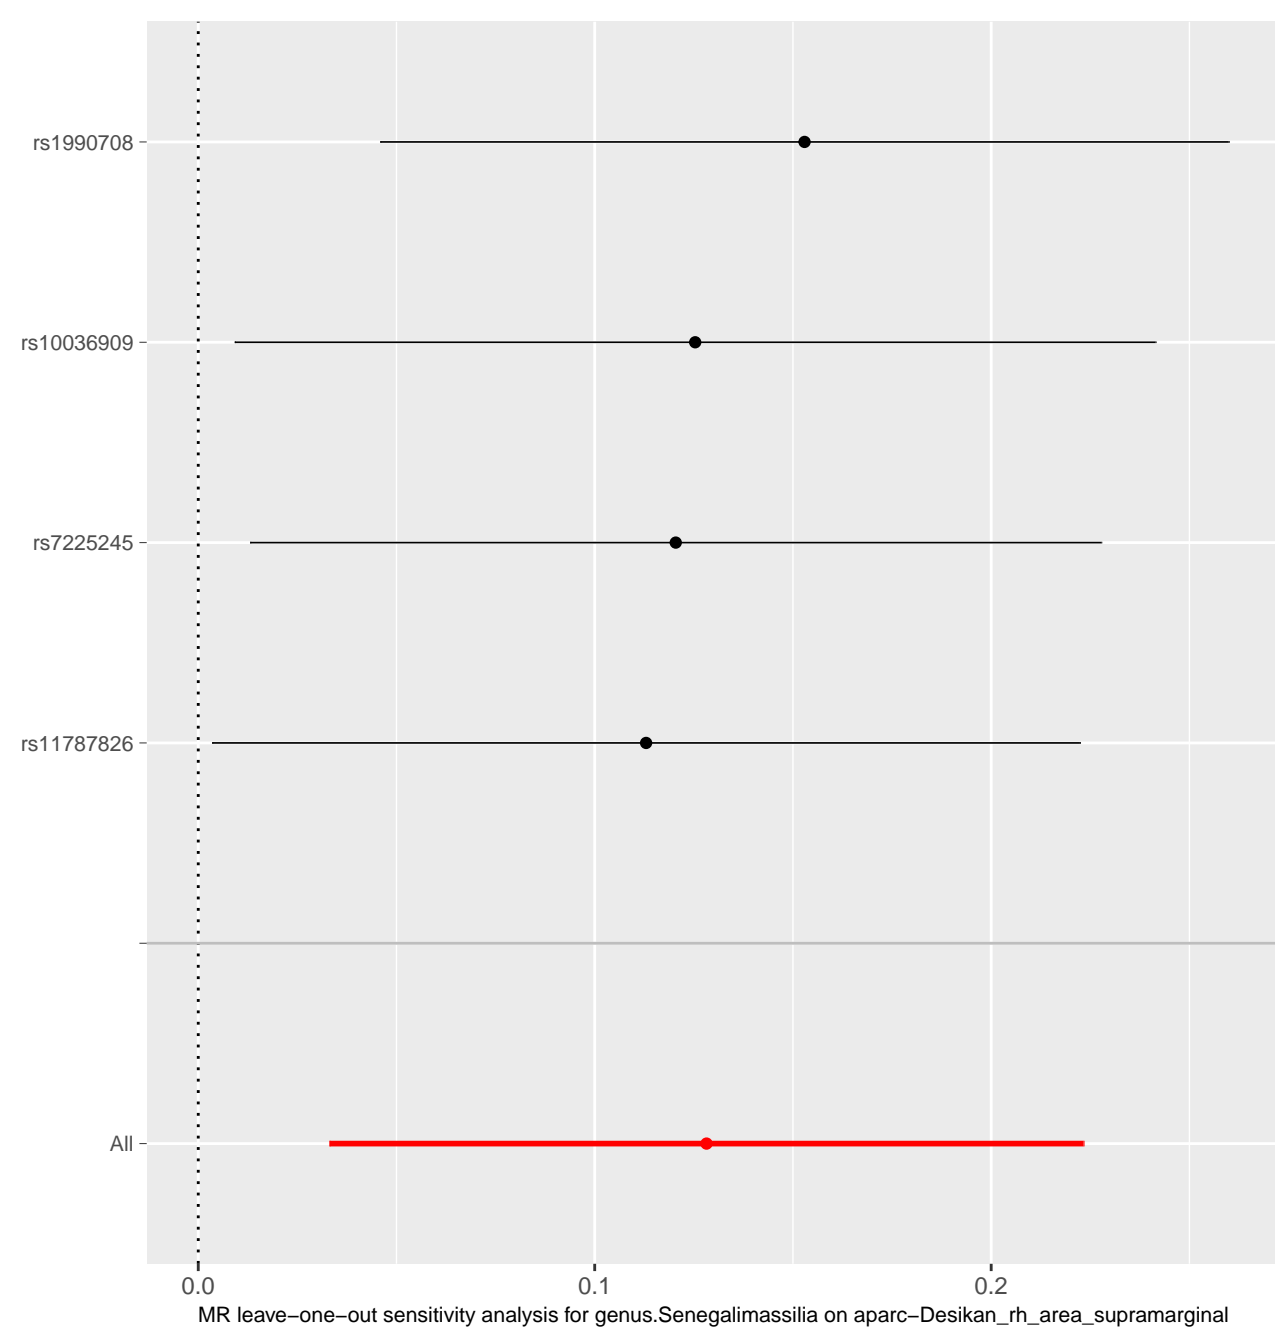

Supplement: mmc12.pdf [file mmc12.pdf]

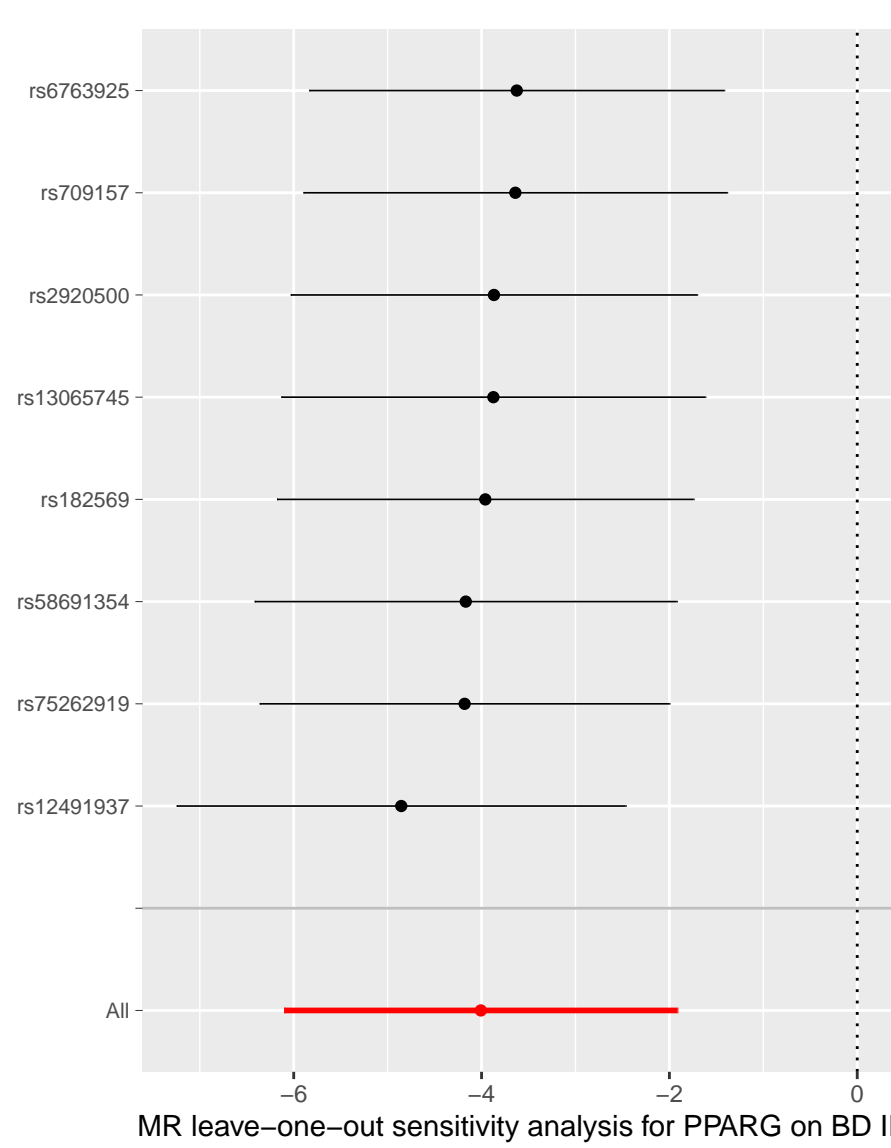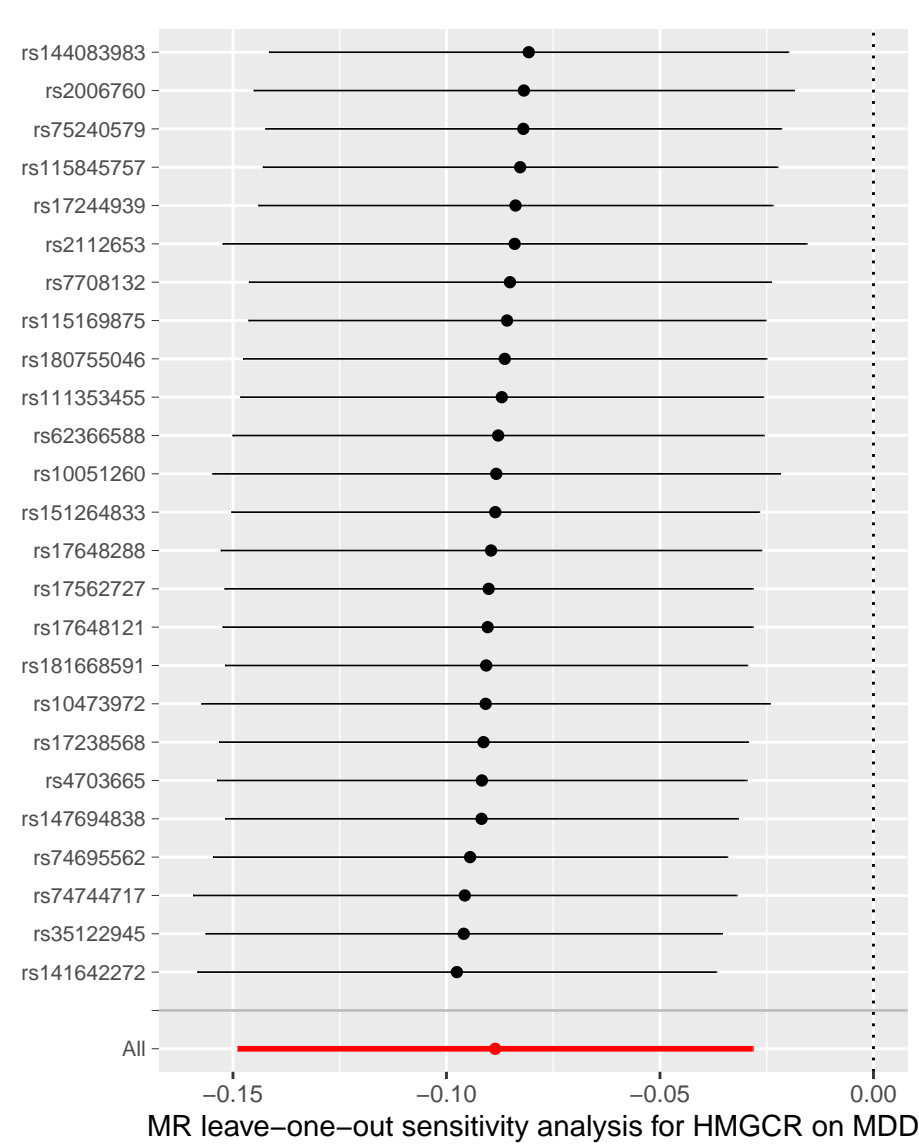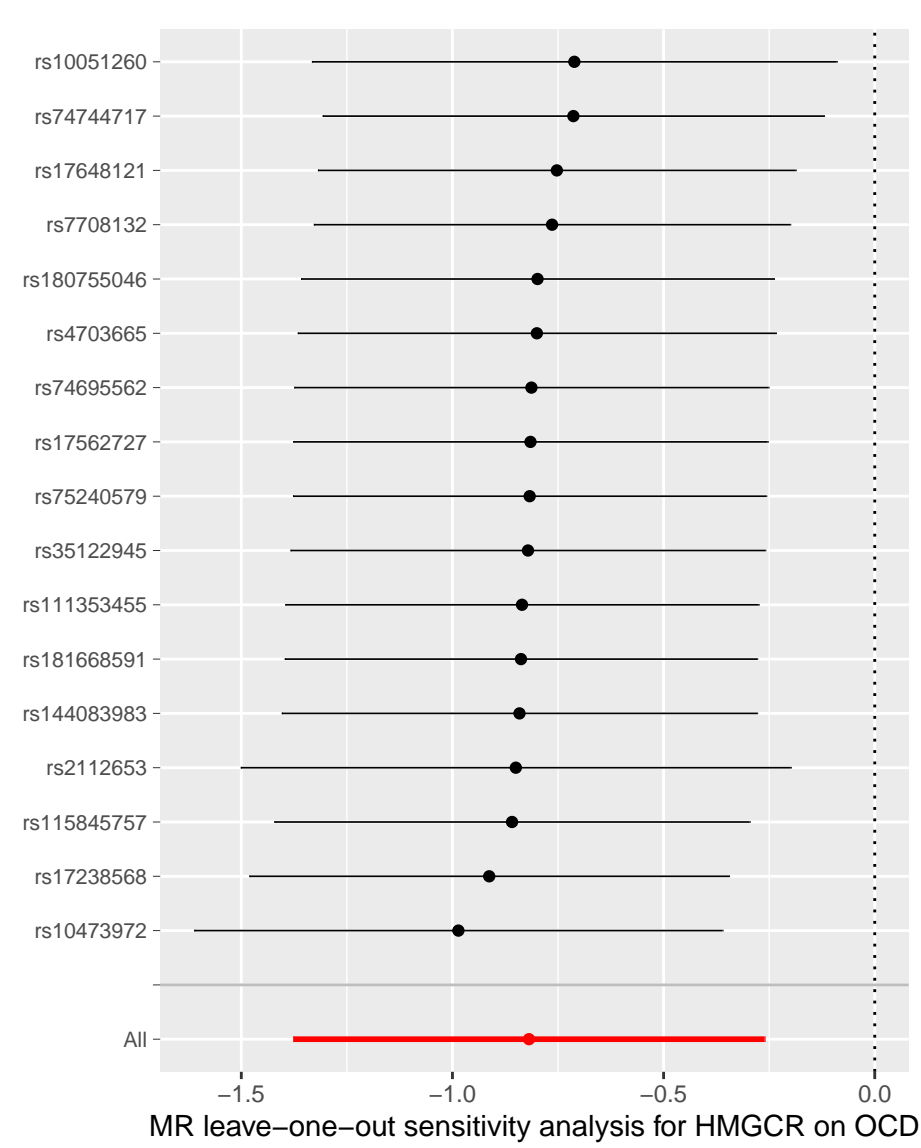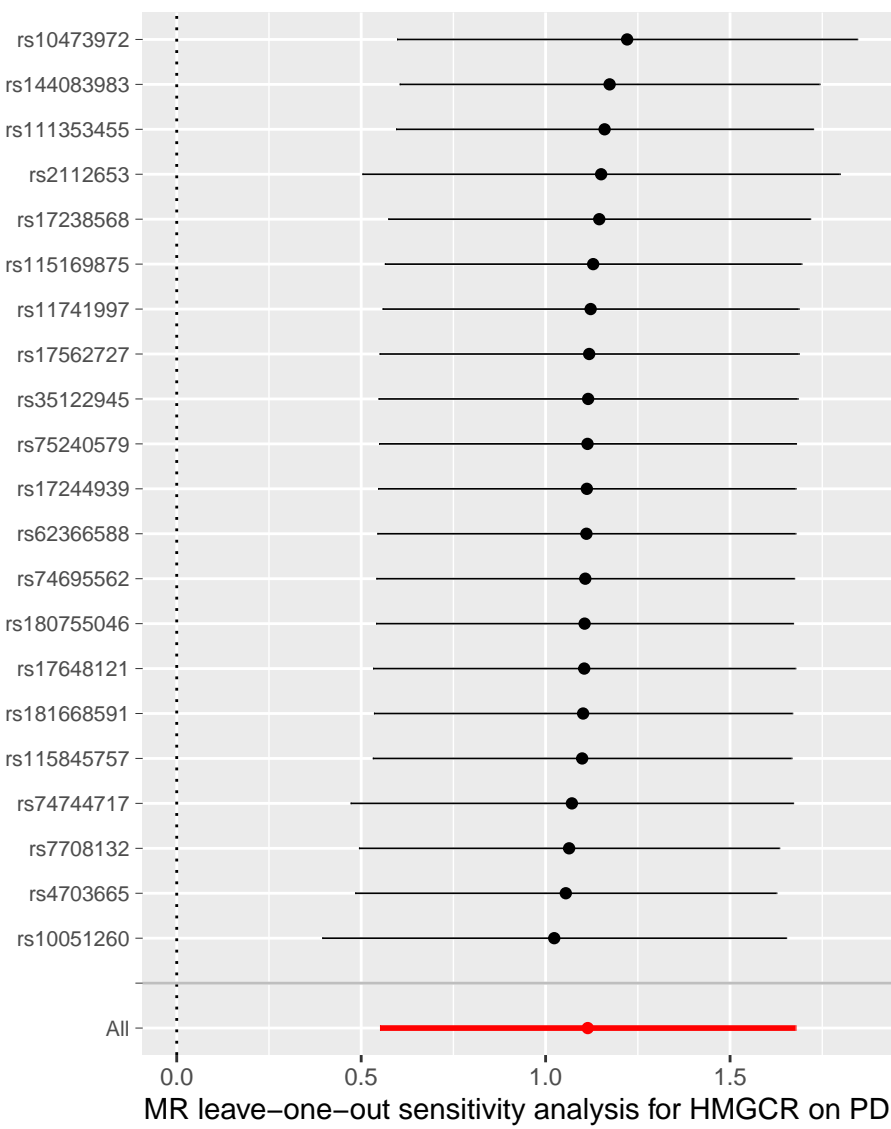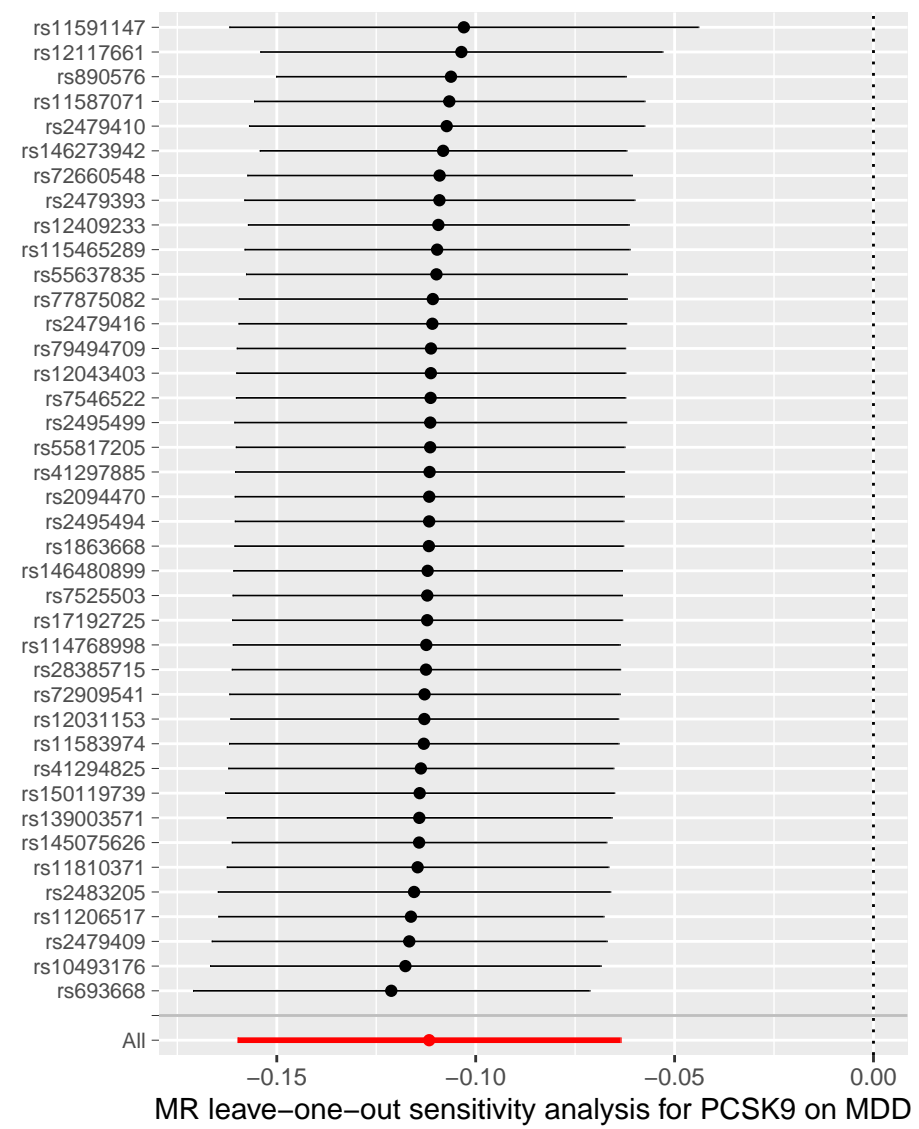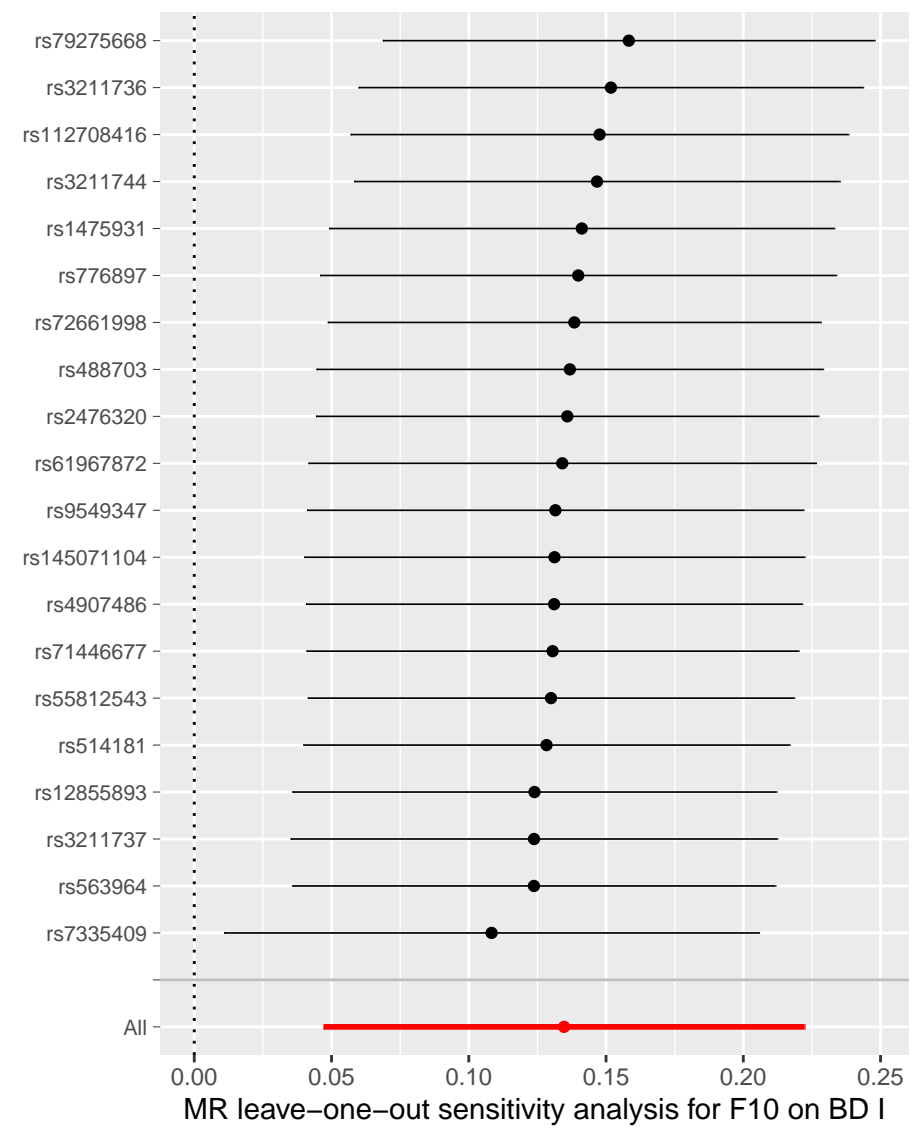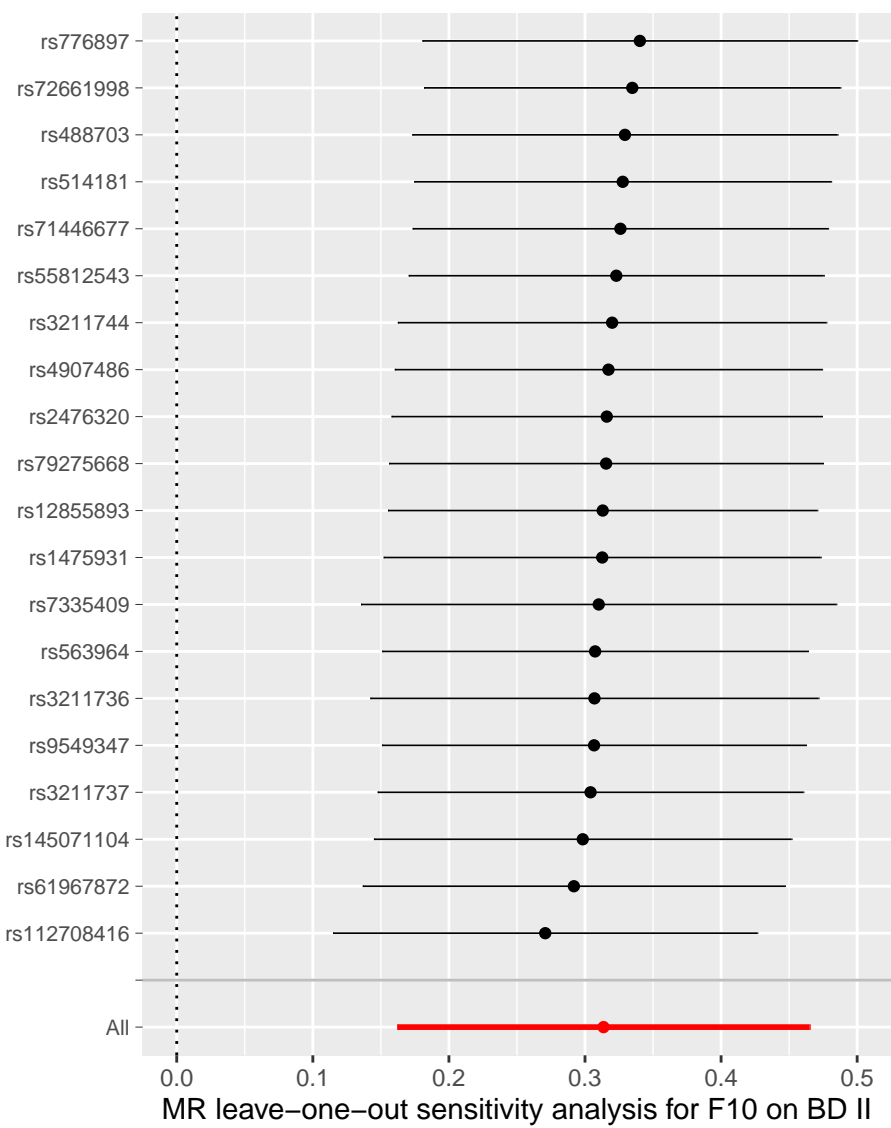

Supplement: mmc3.pdf [file mmc3.pdf]

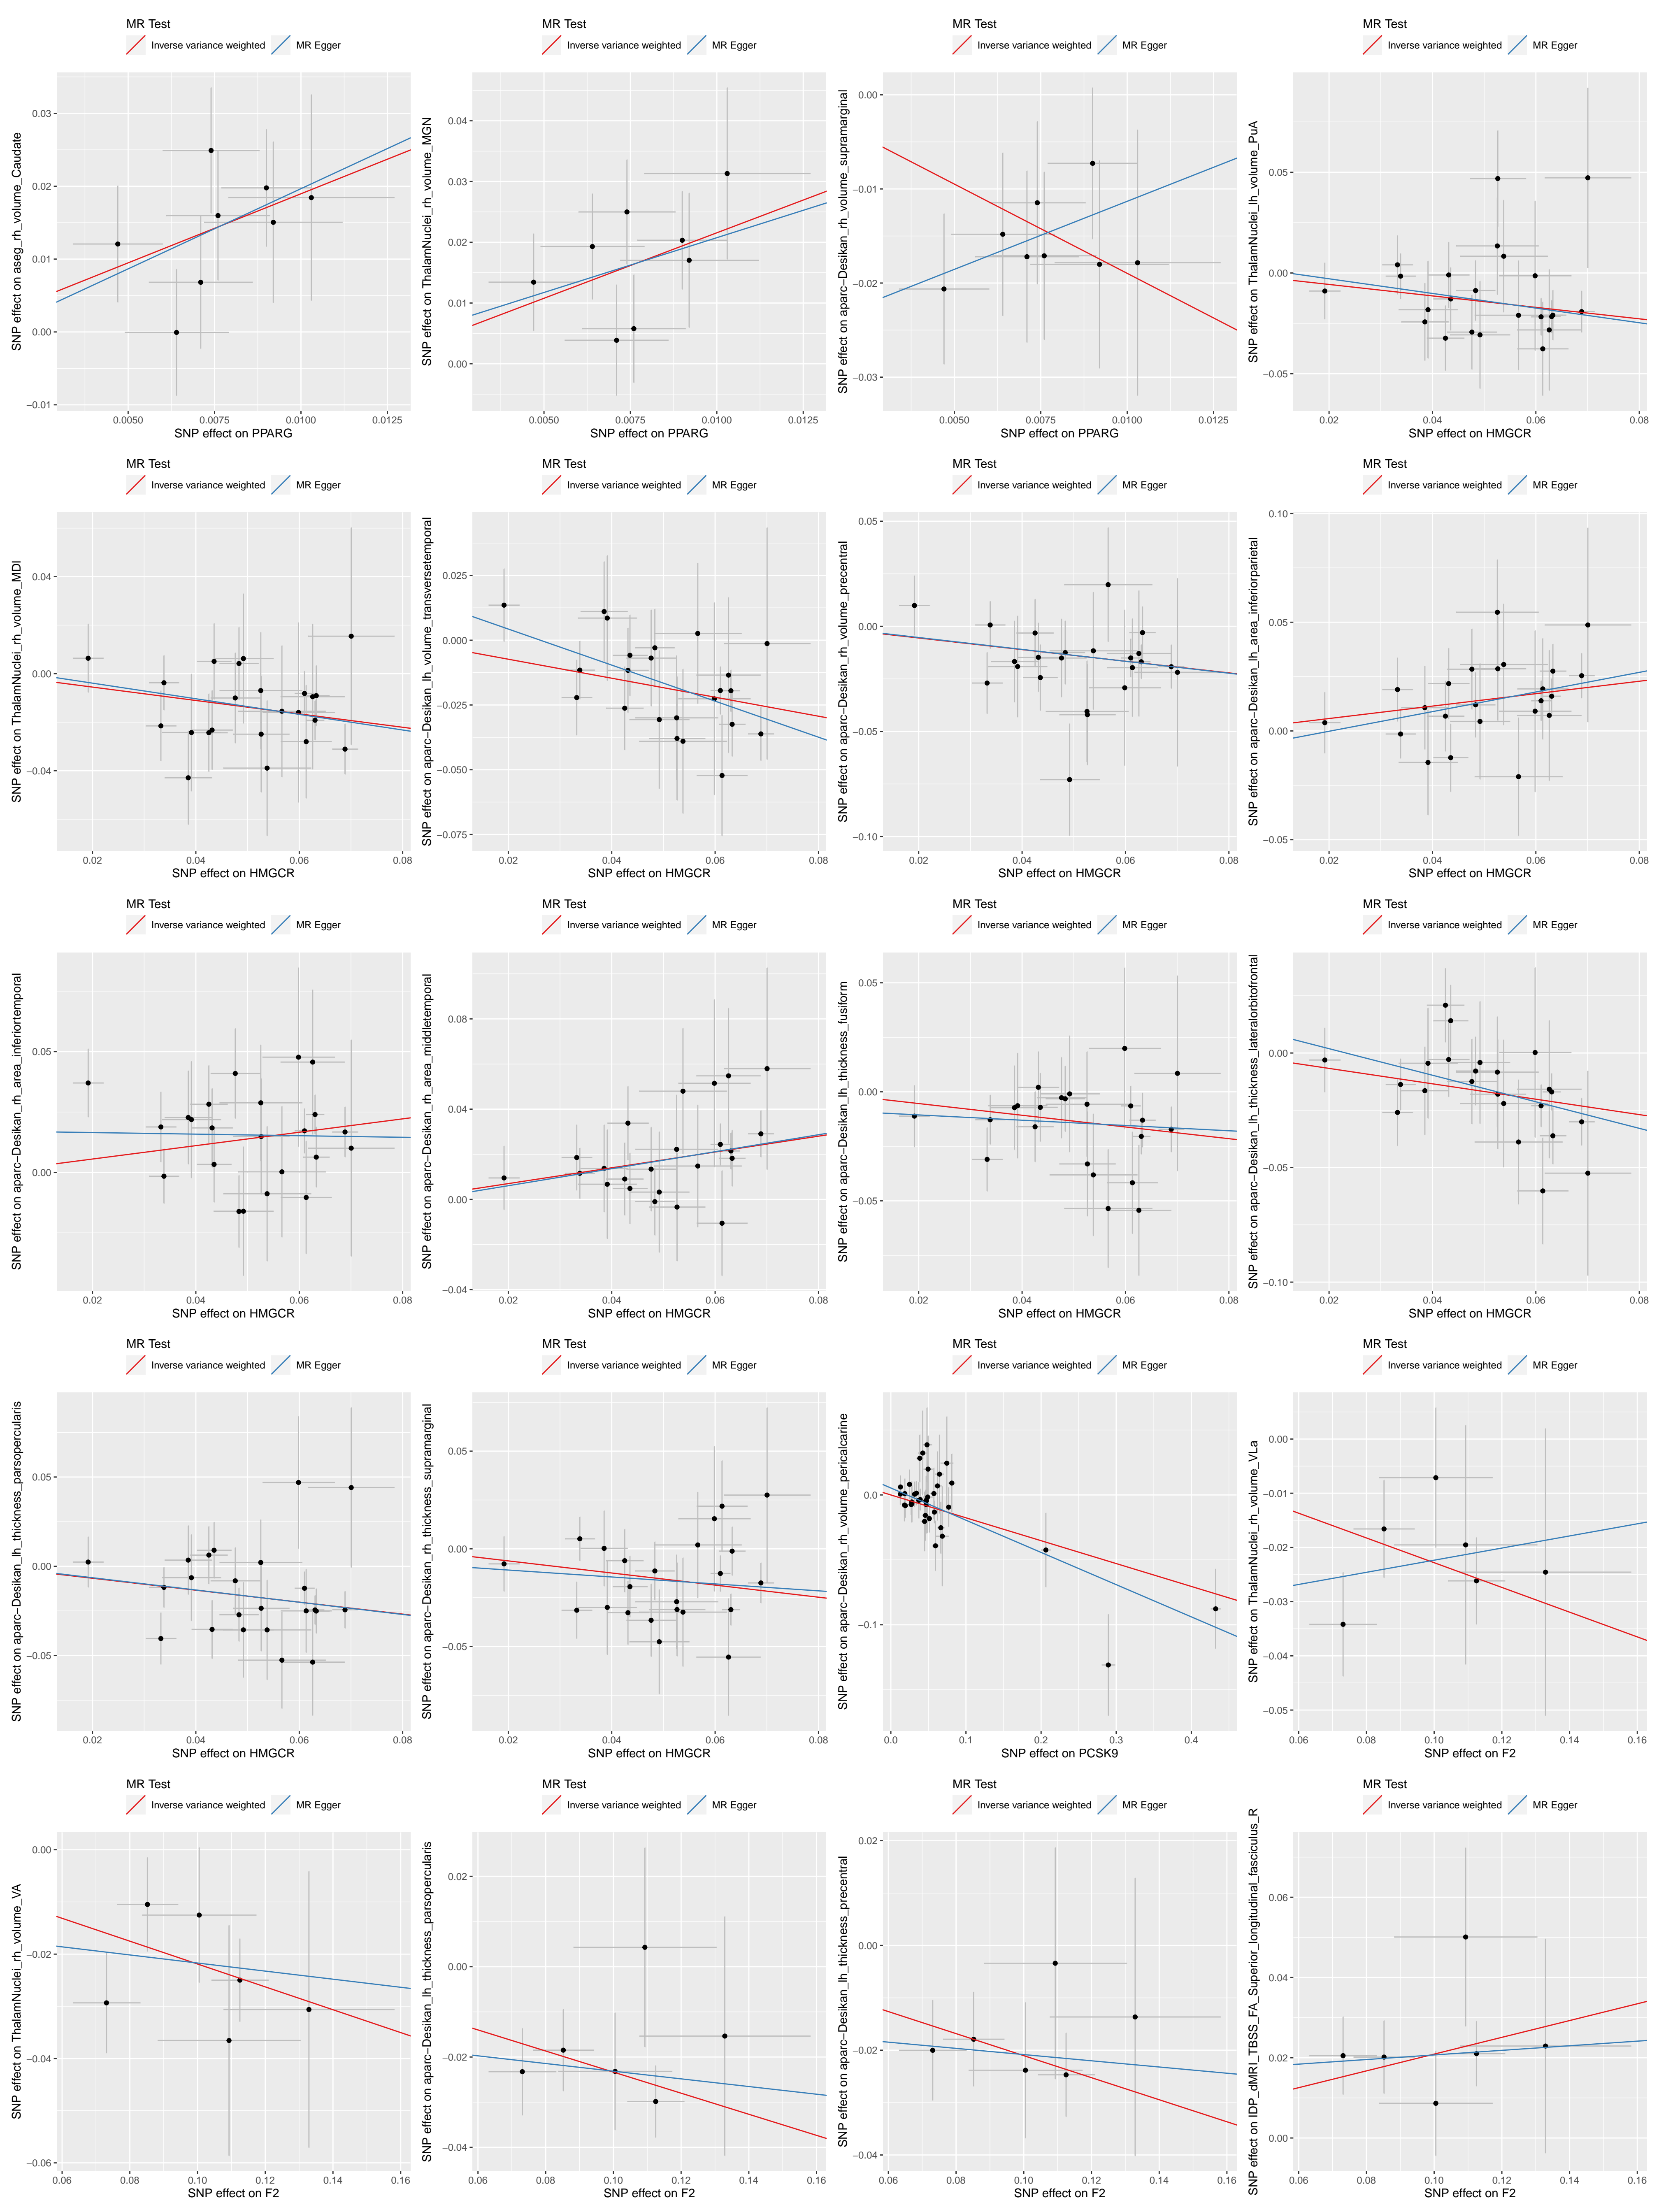

Supplement: mmc4.pdf [file mmc4.pdf]

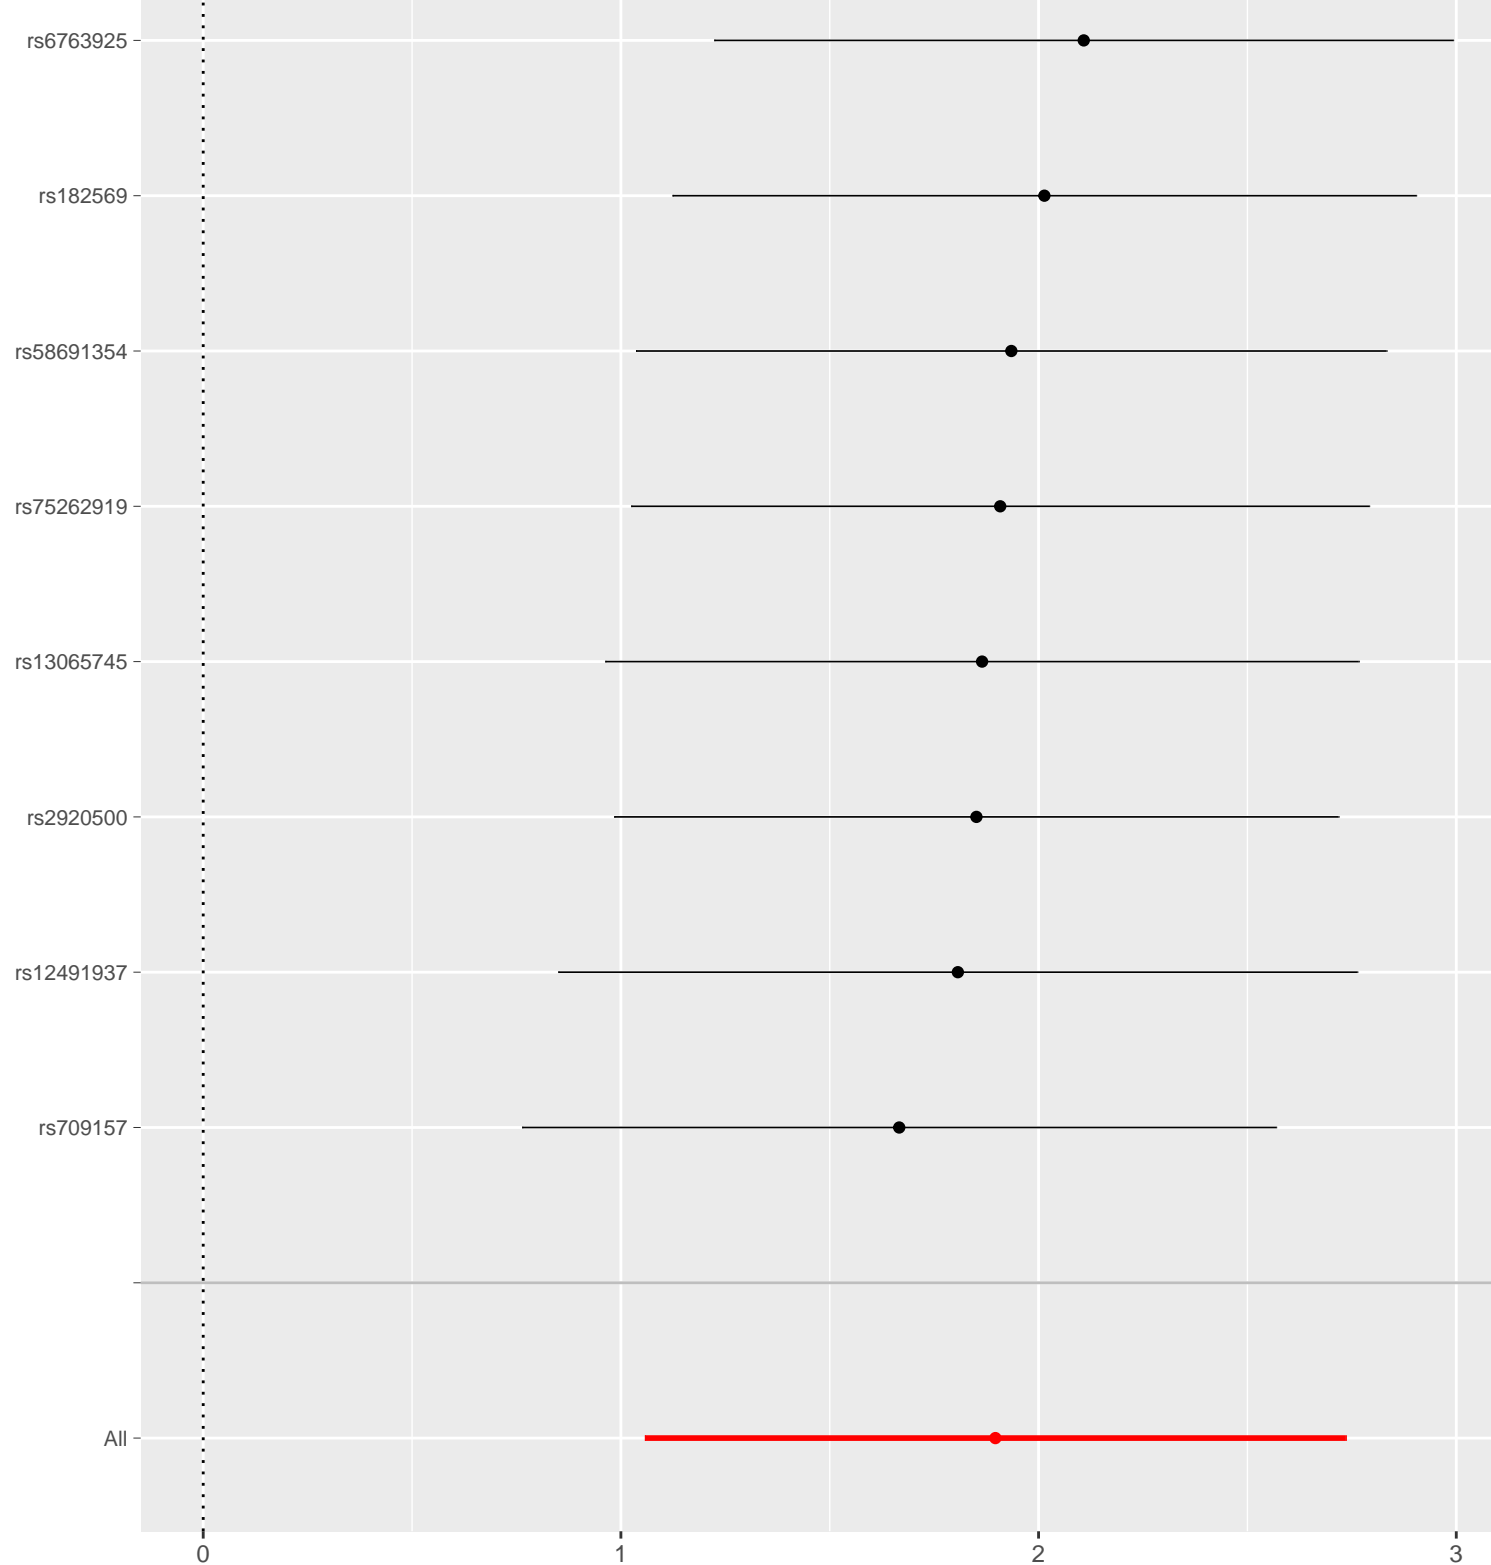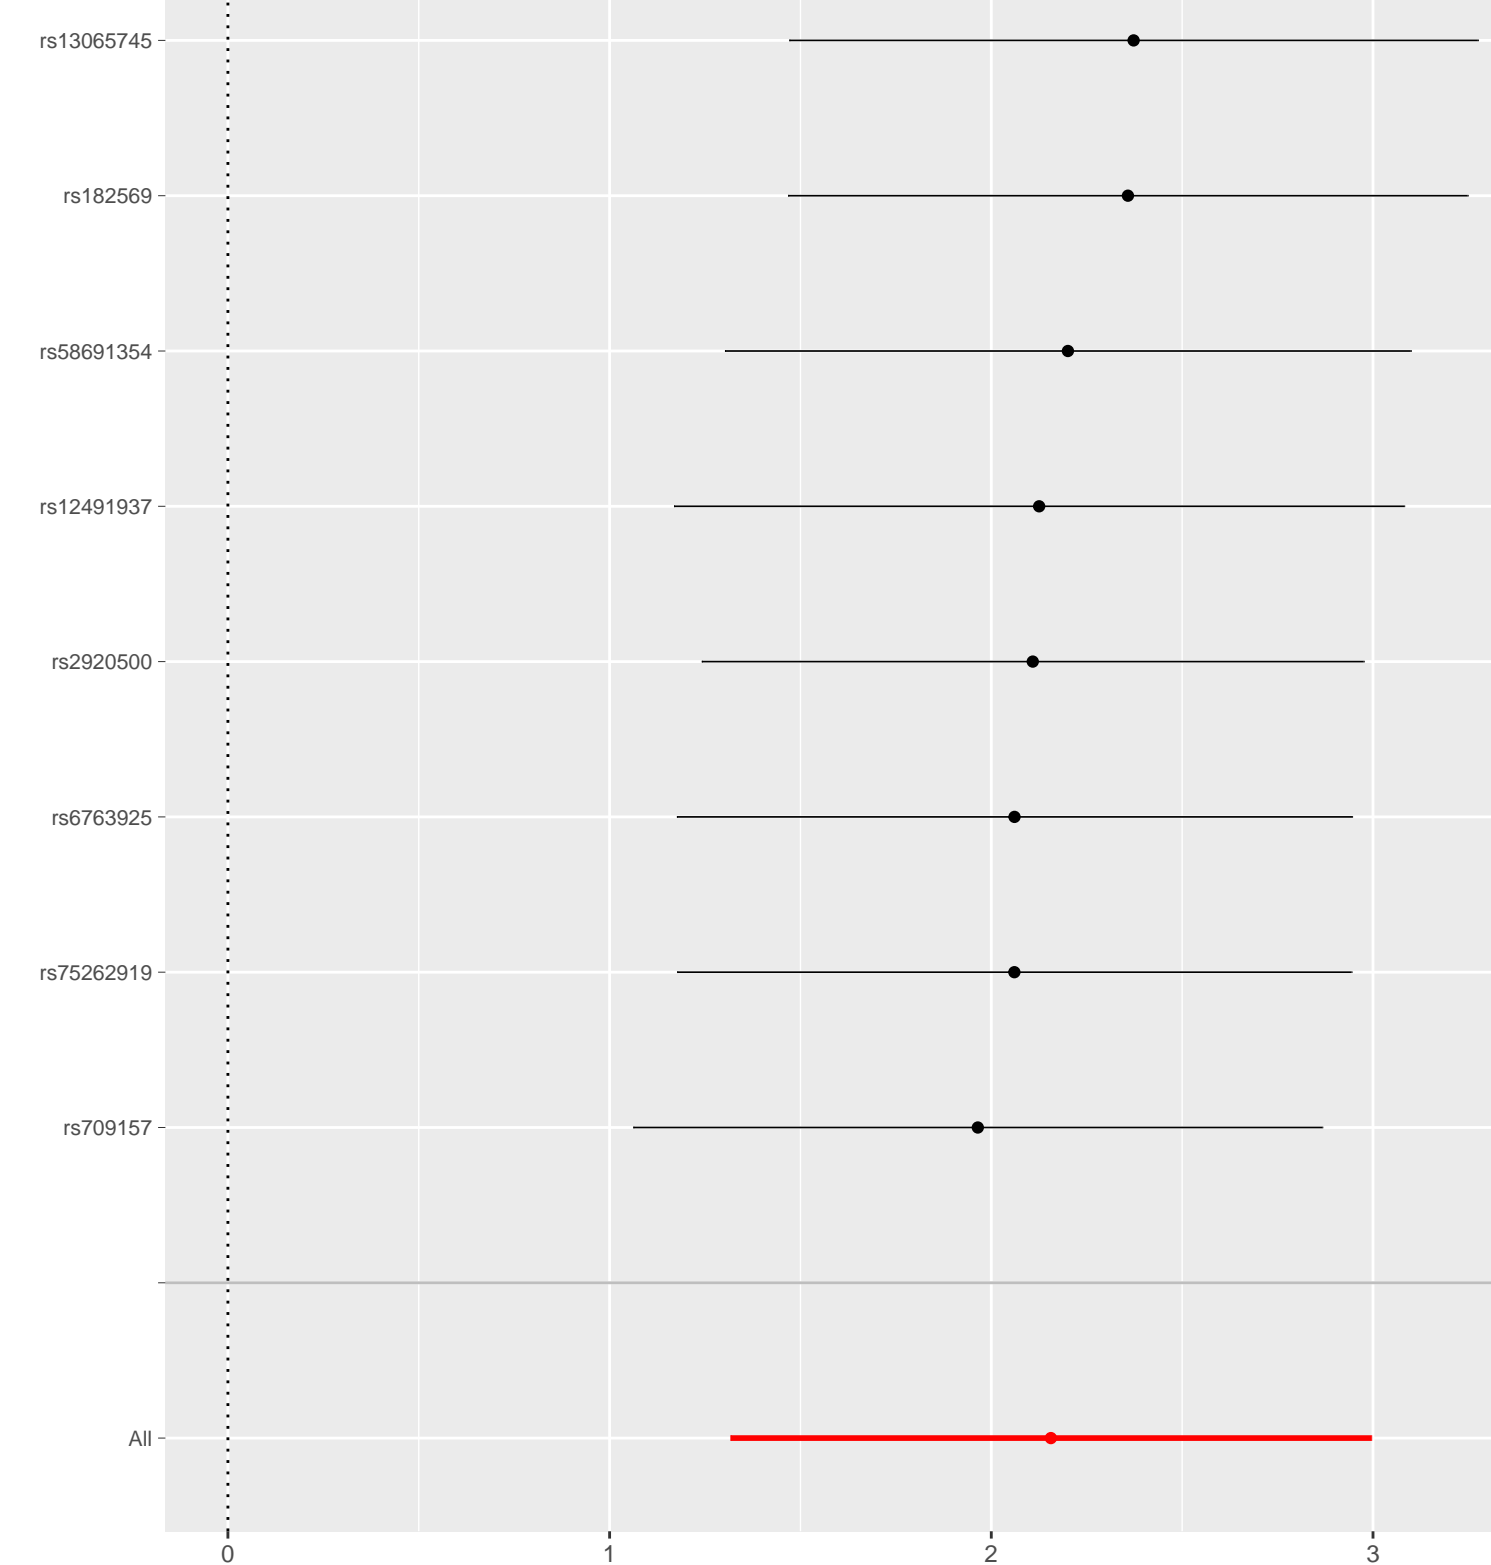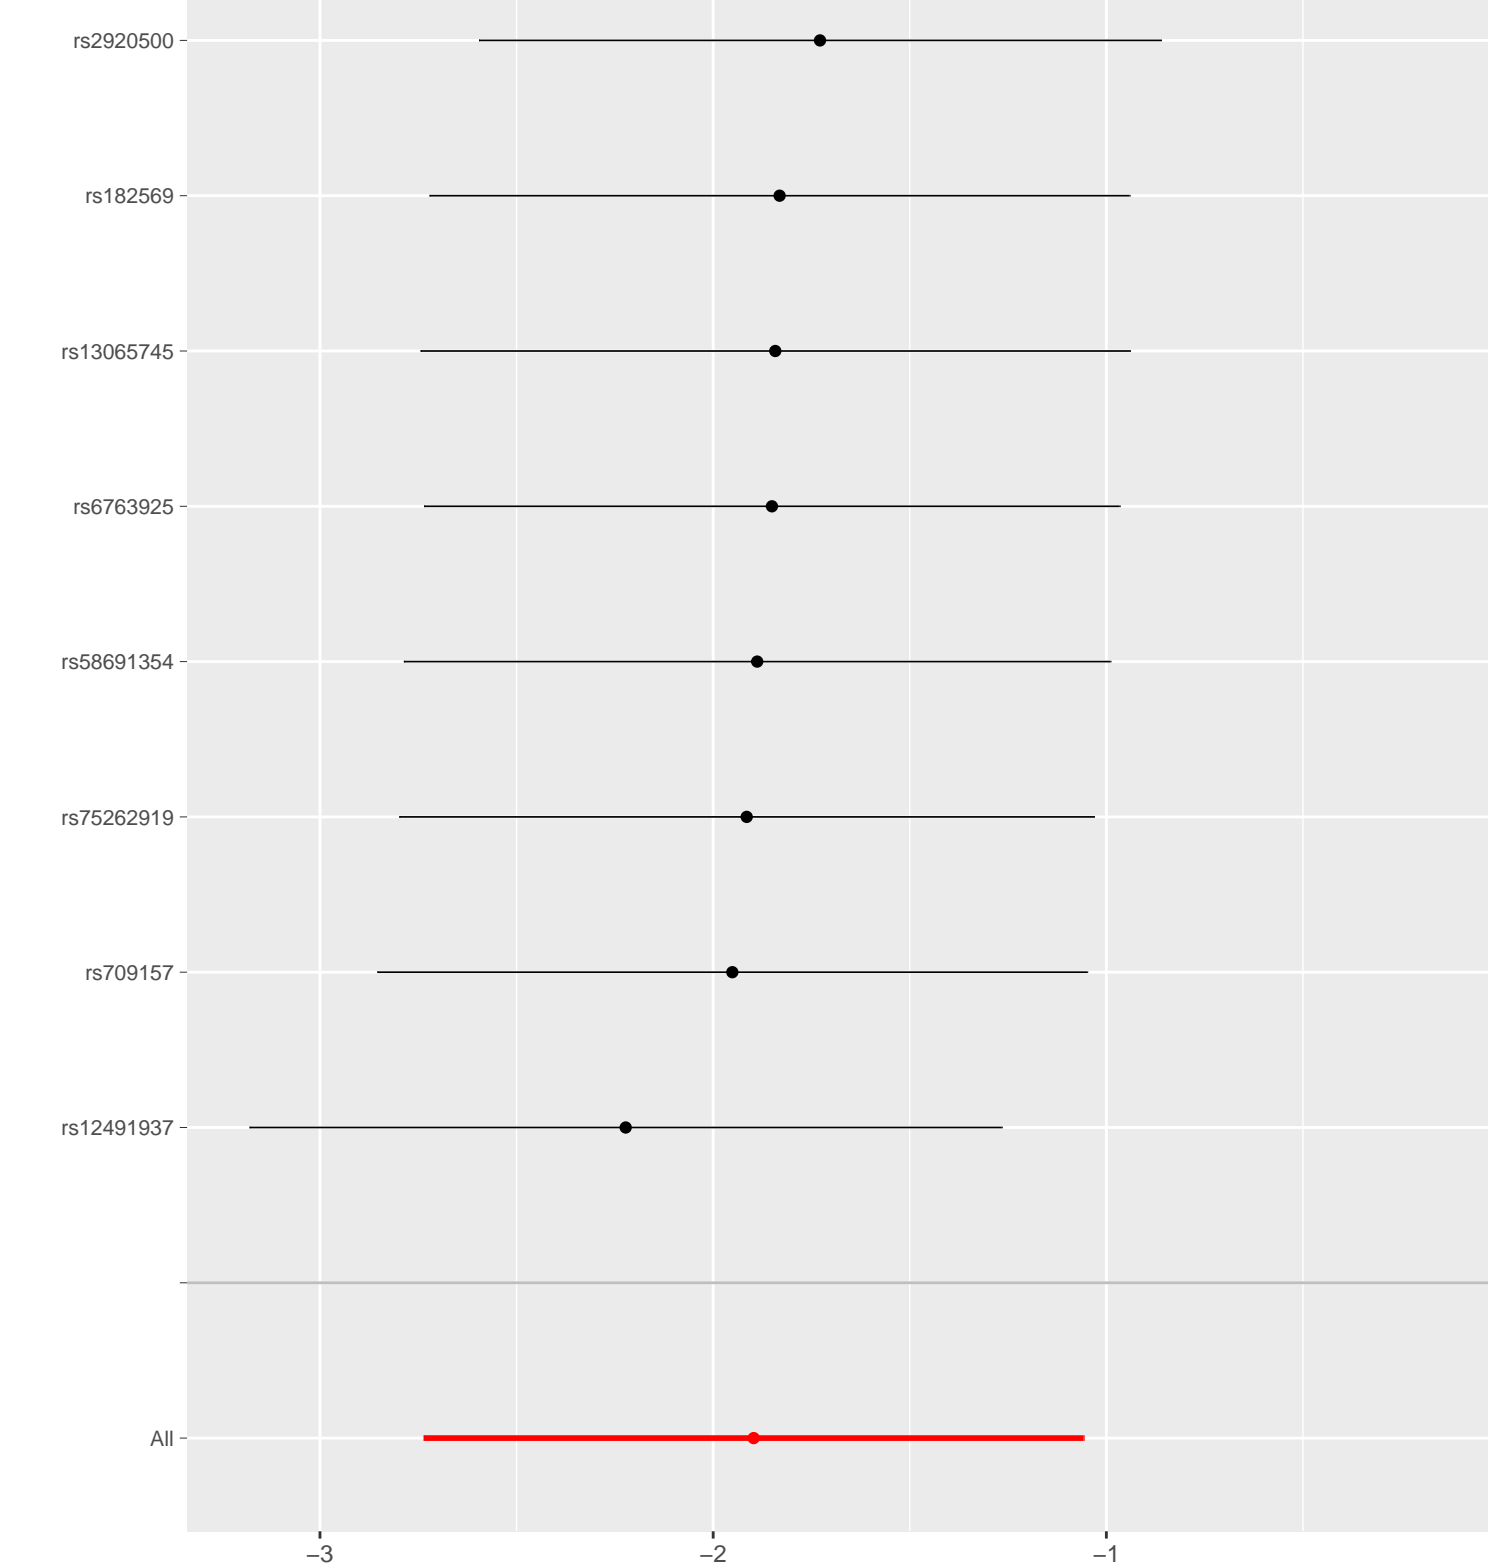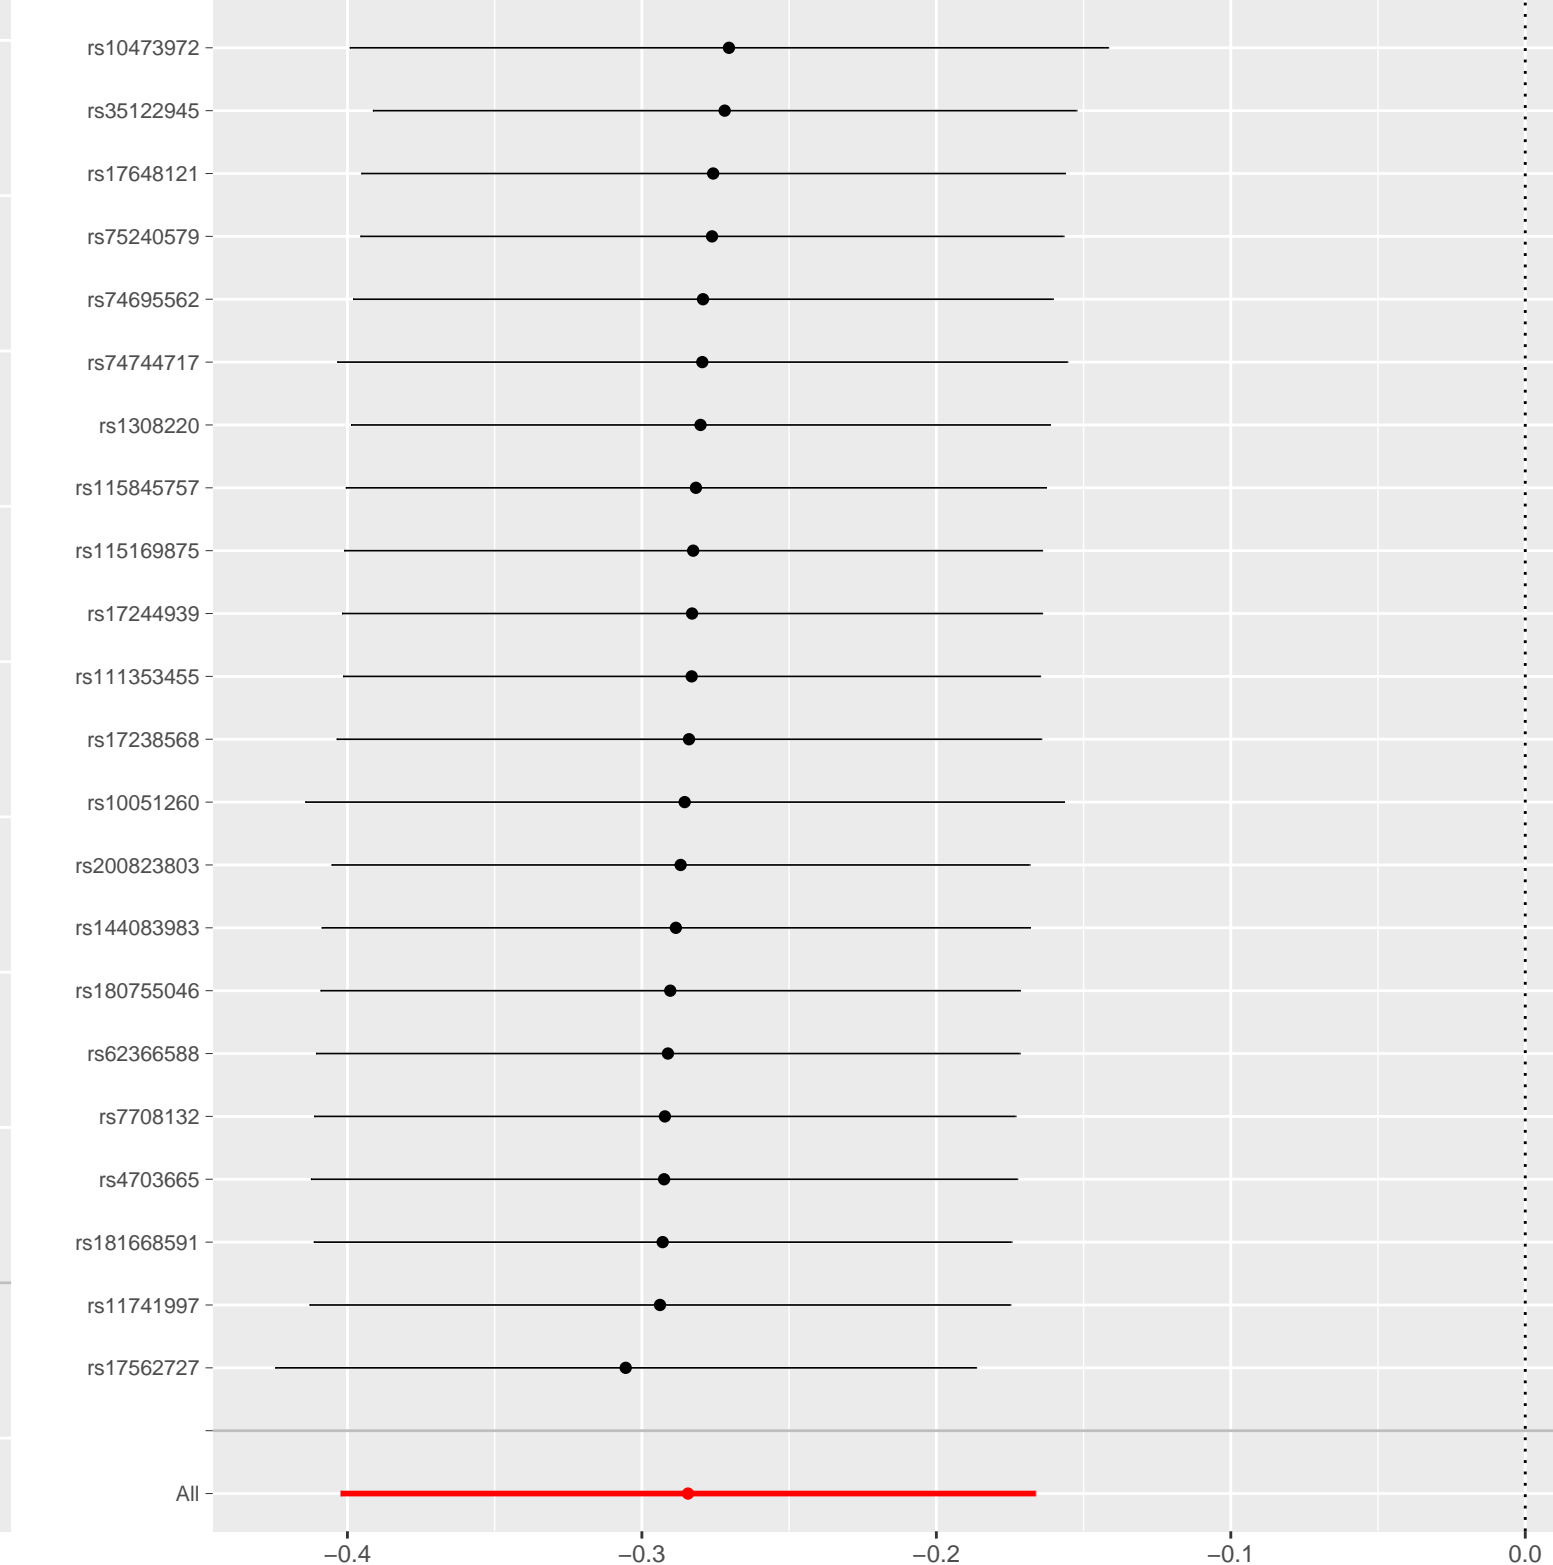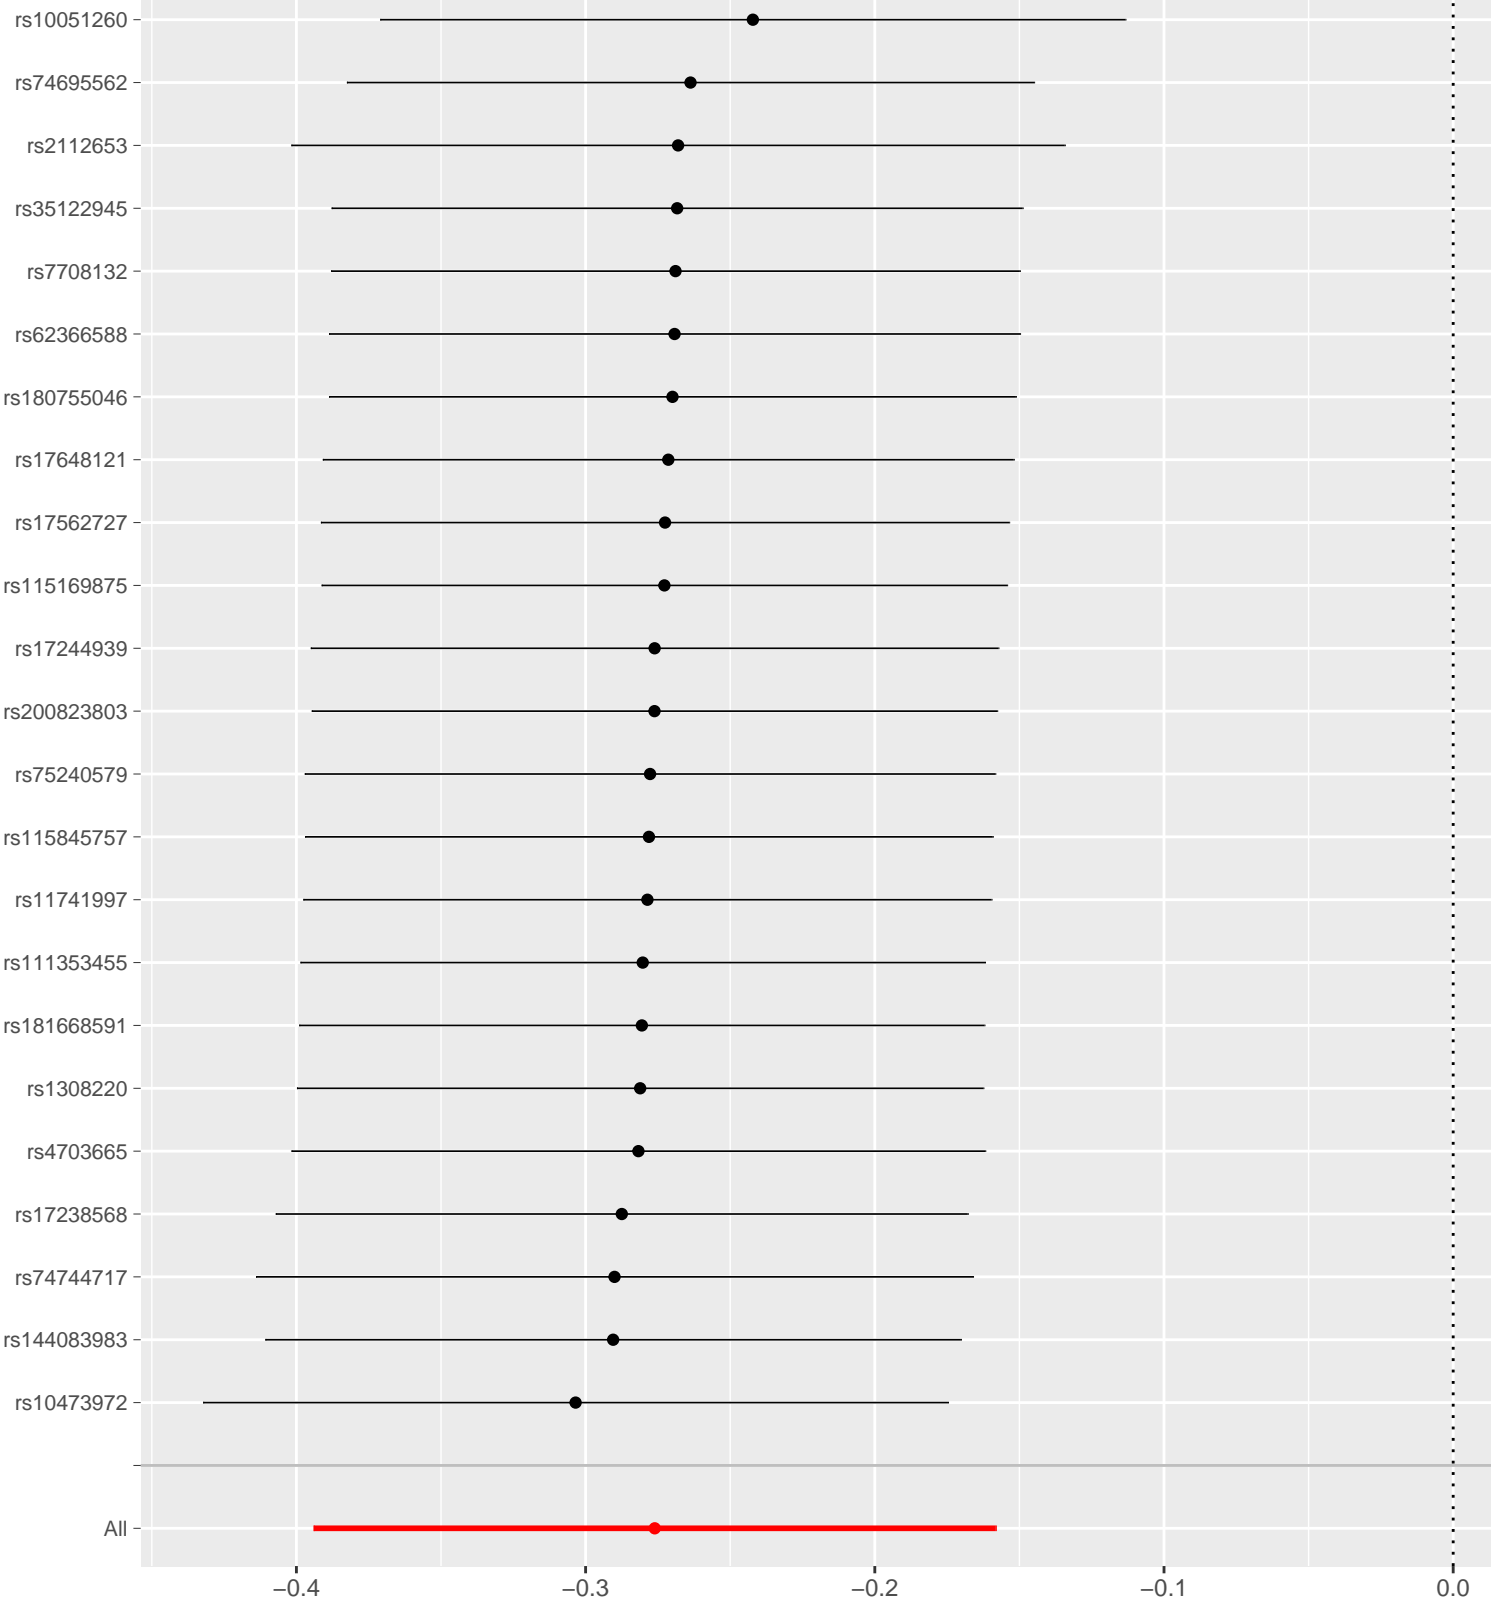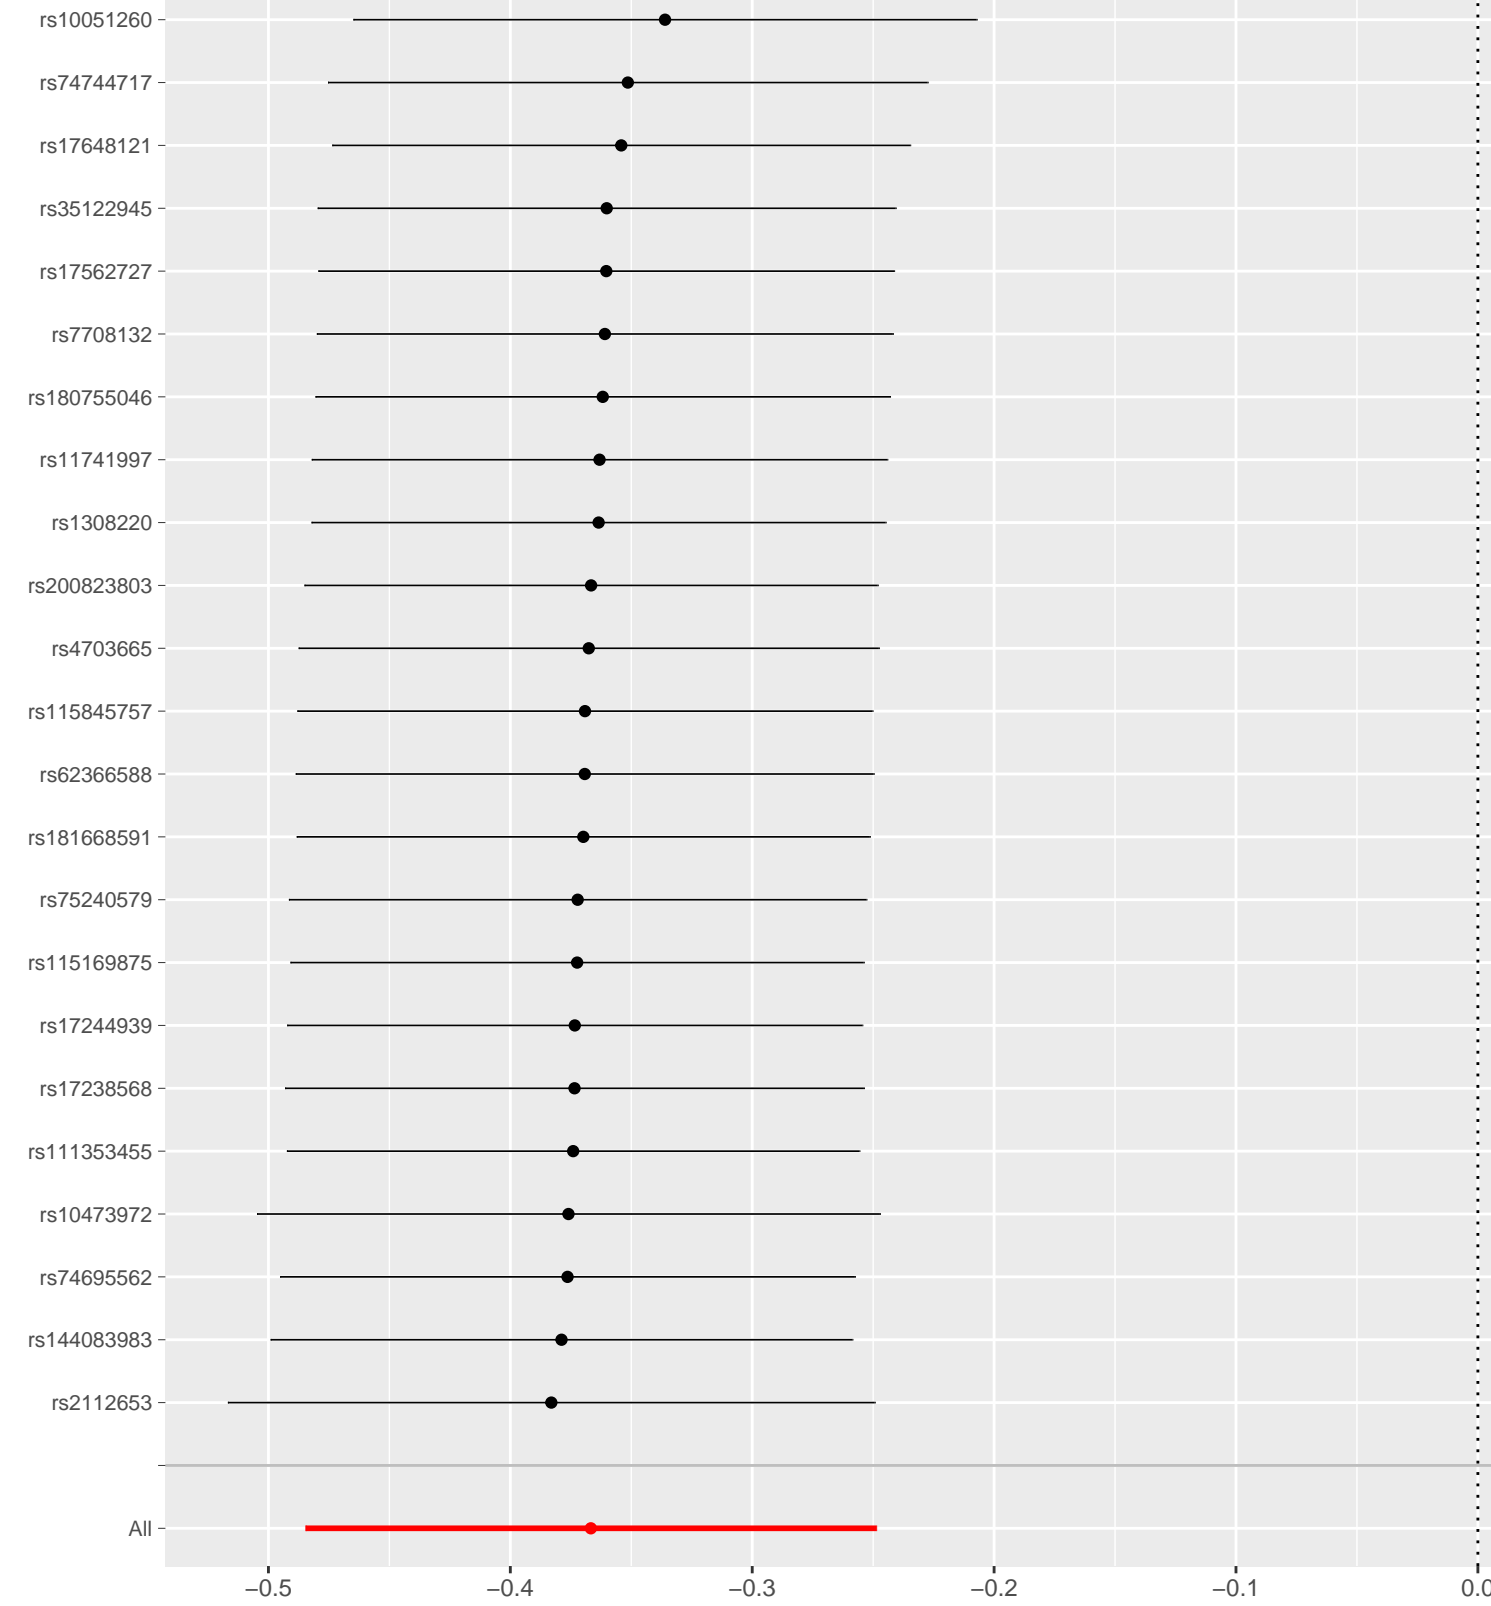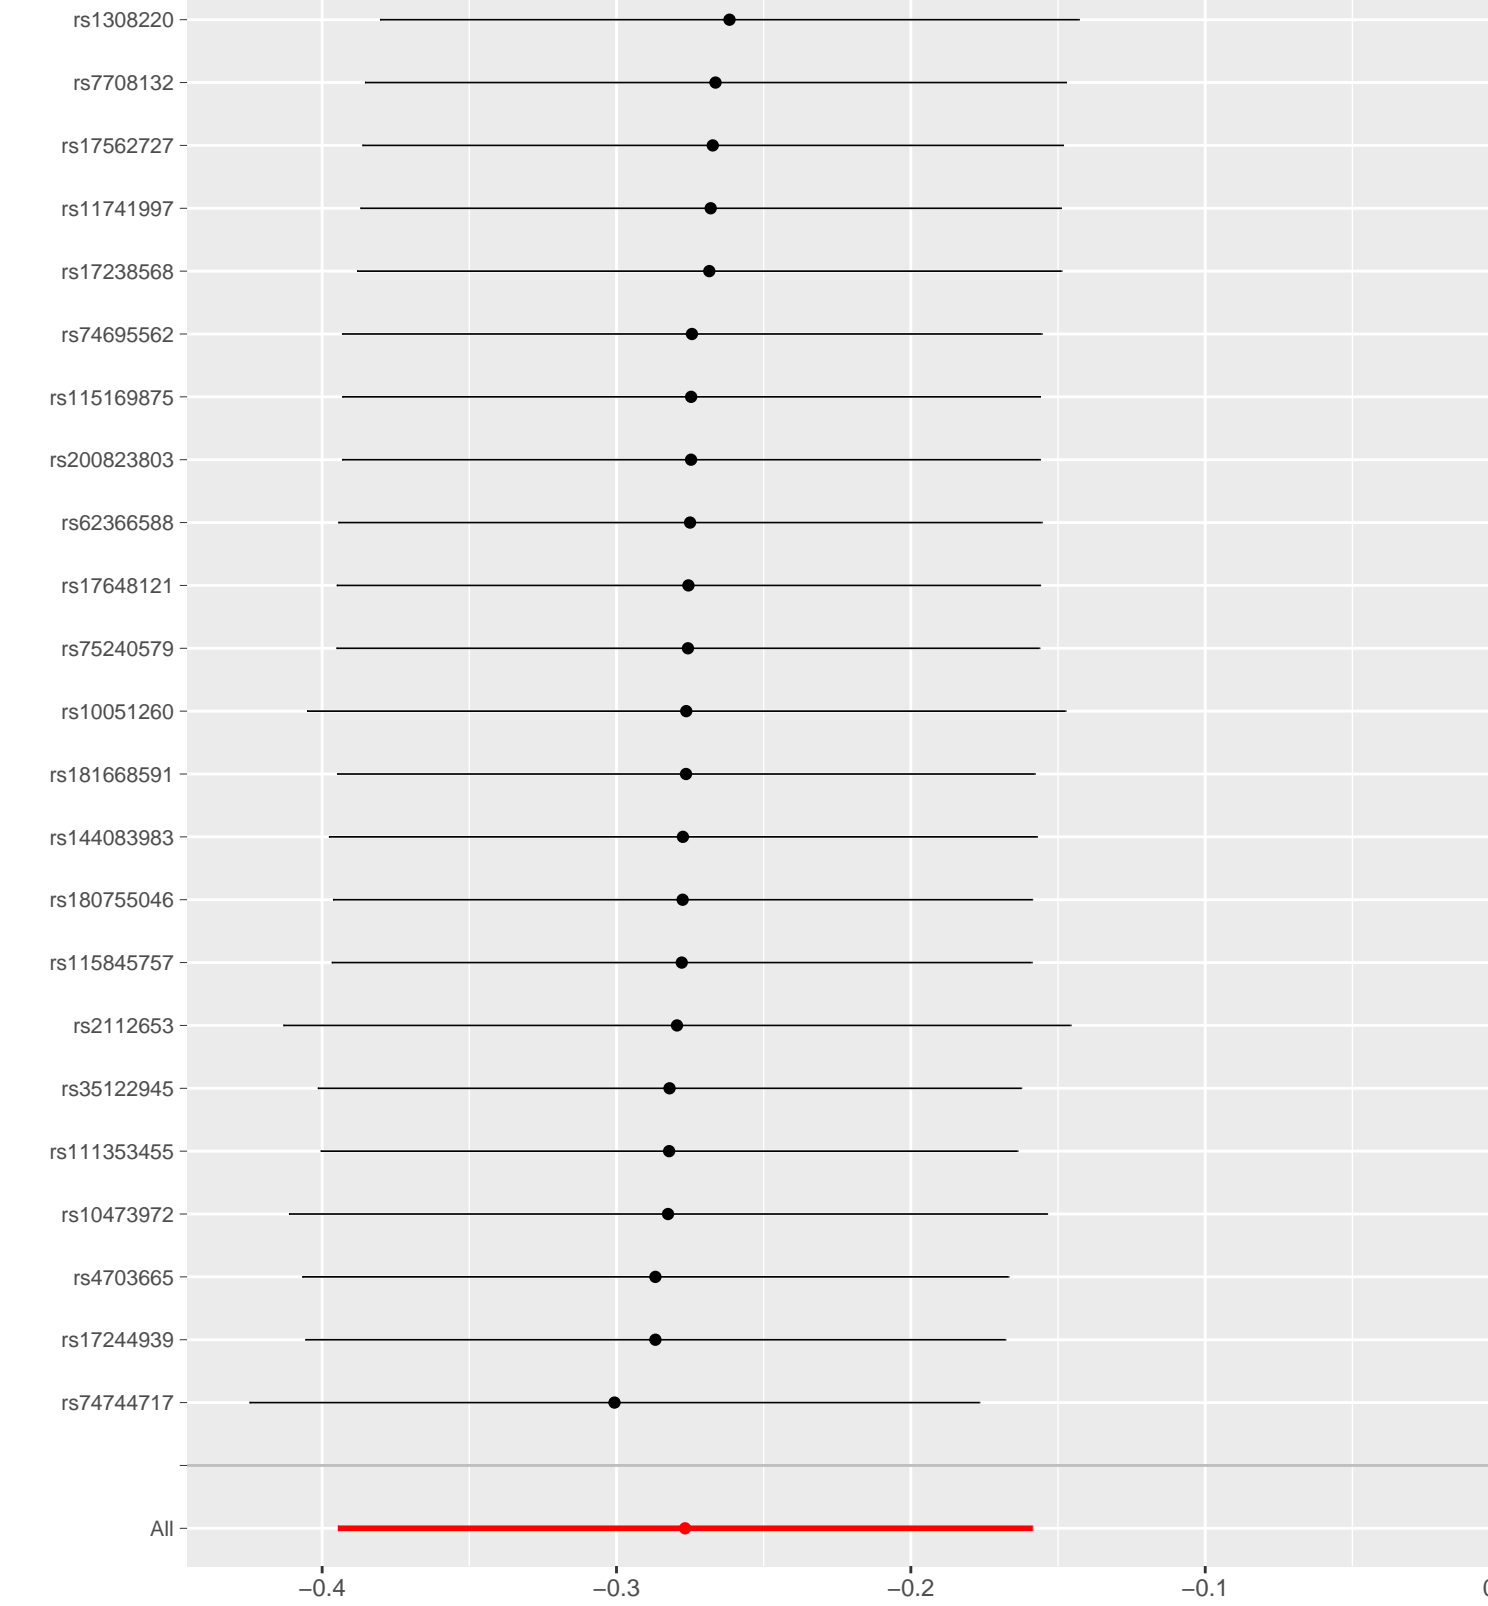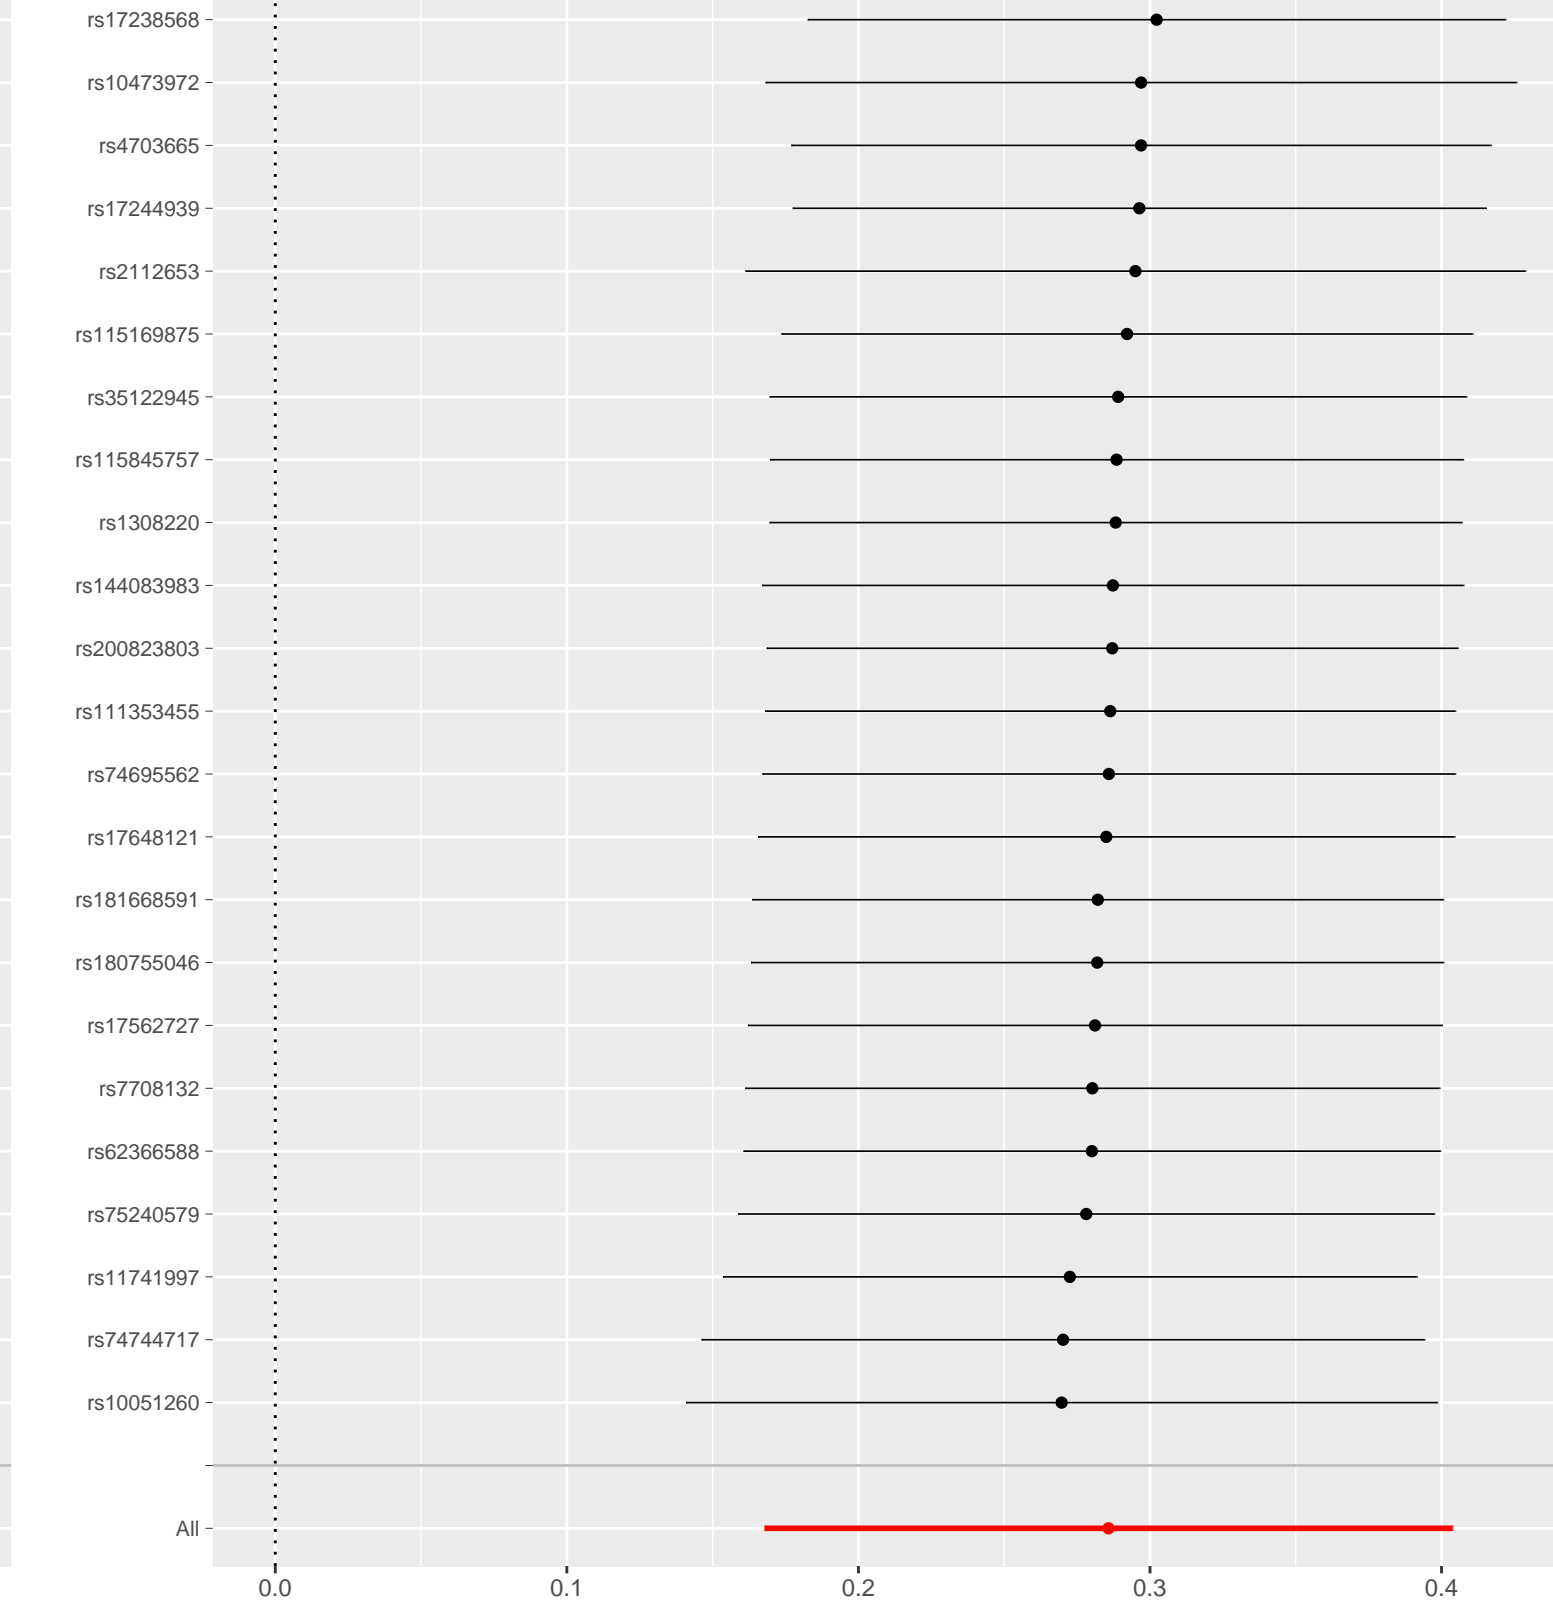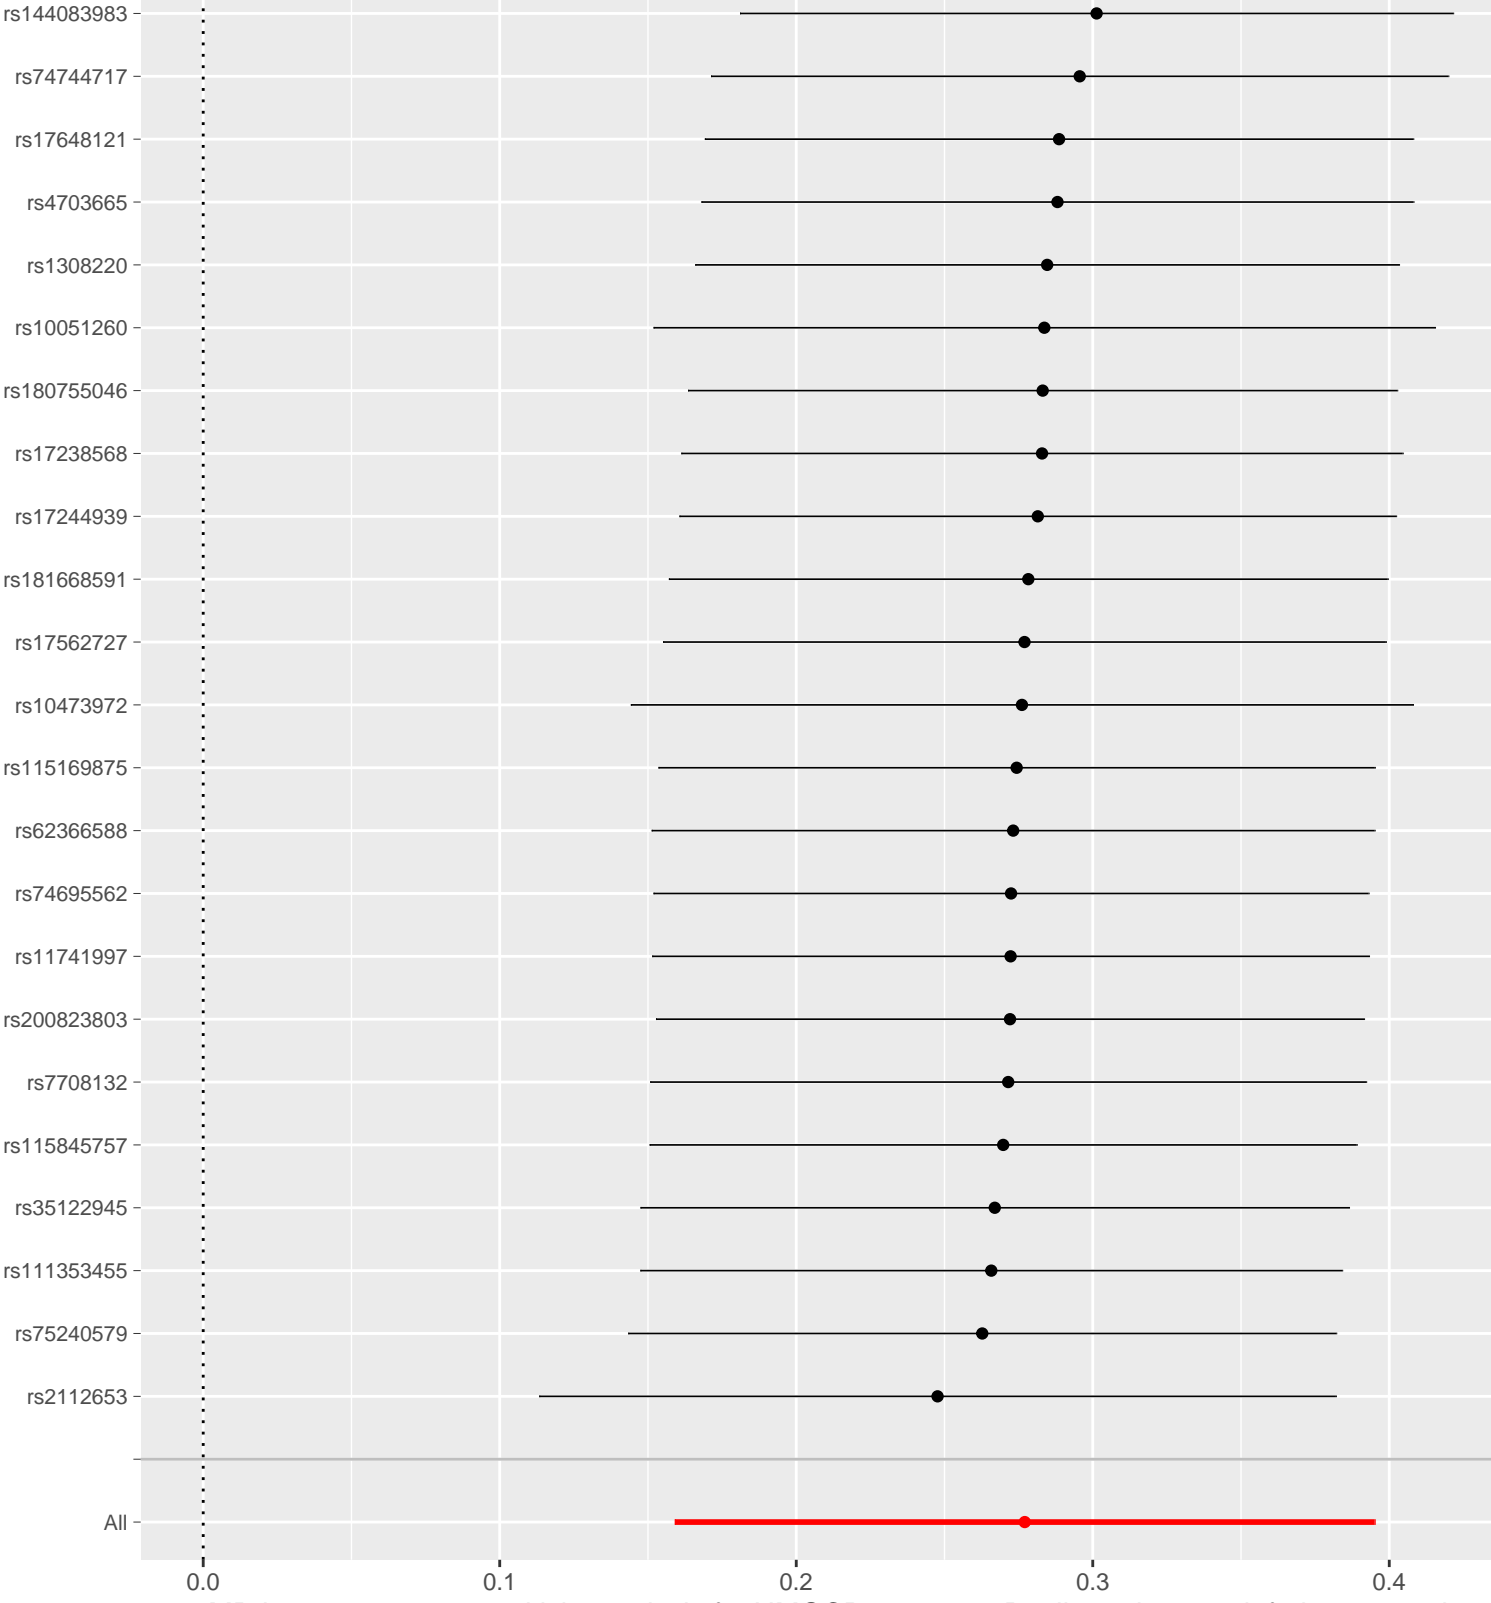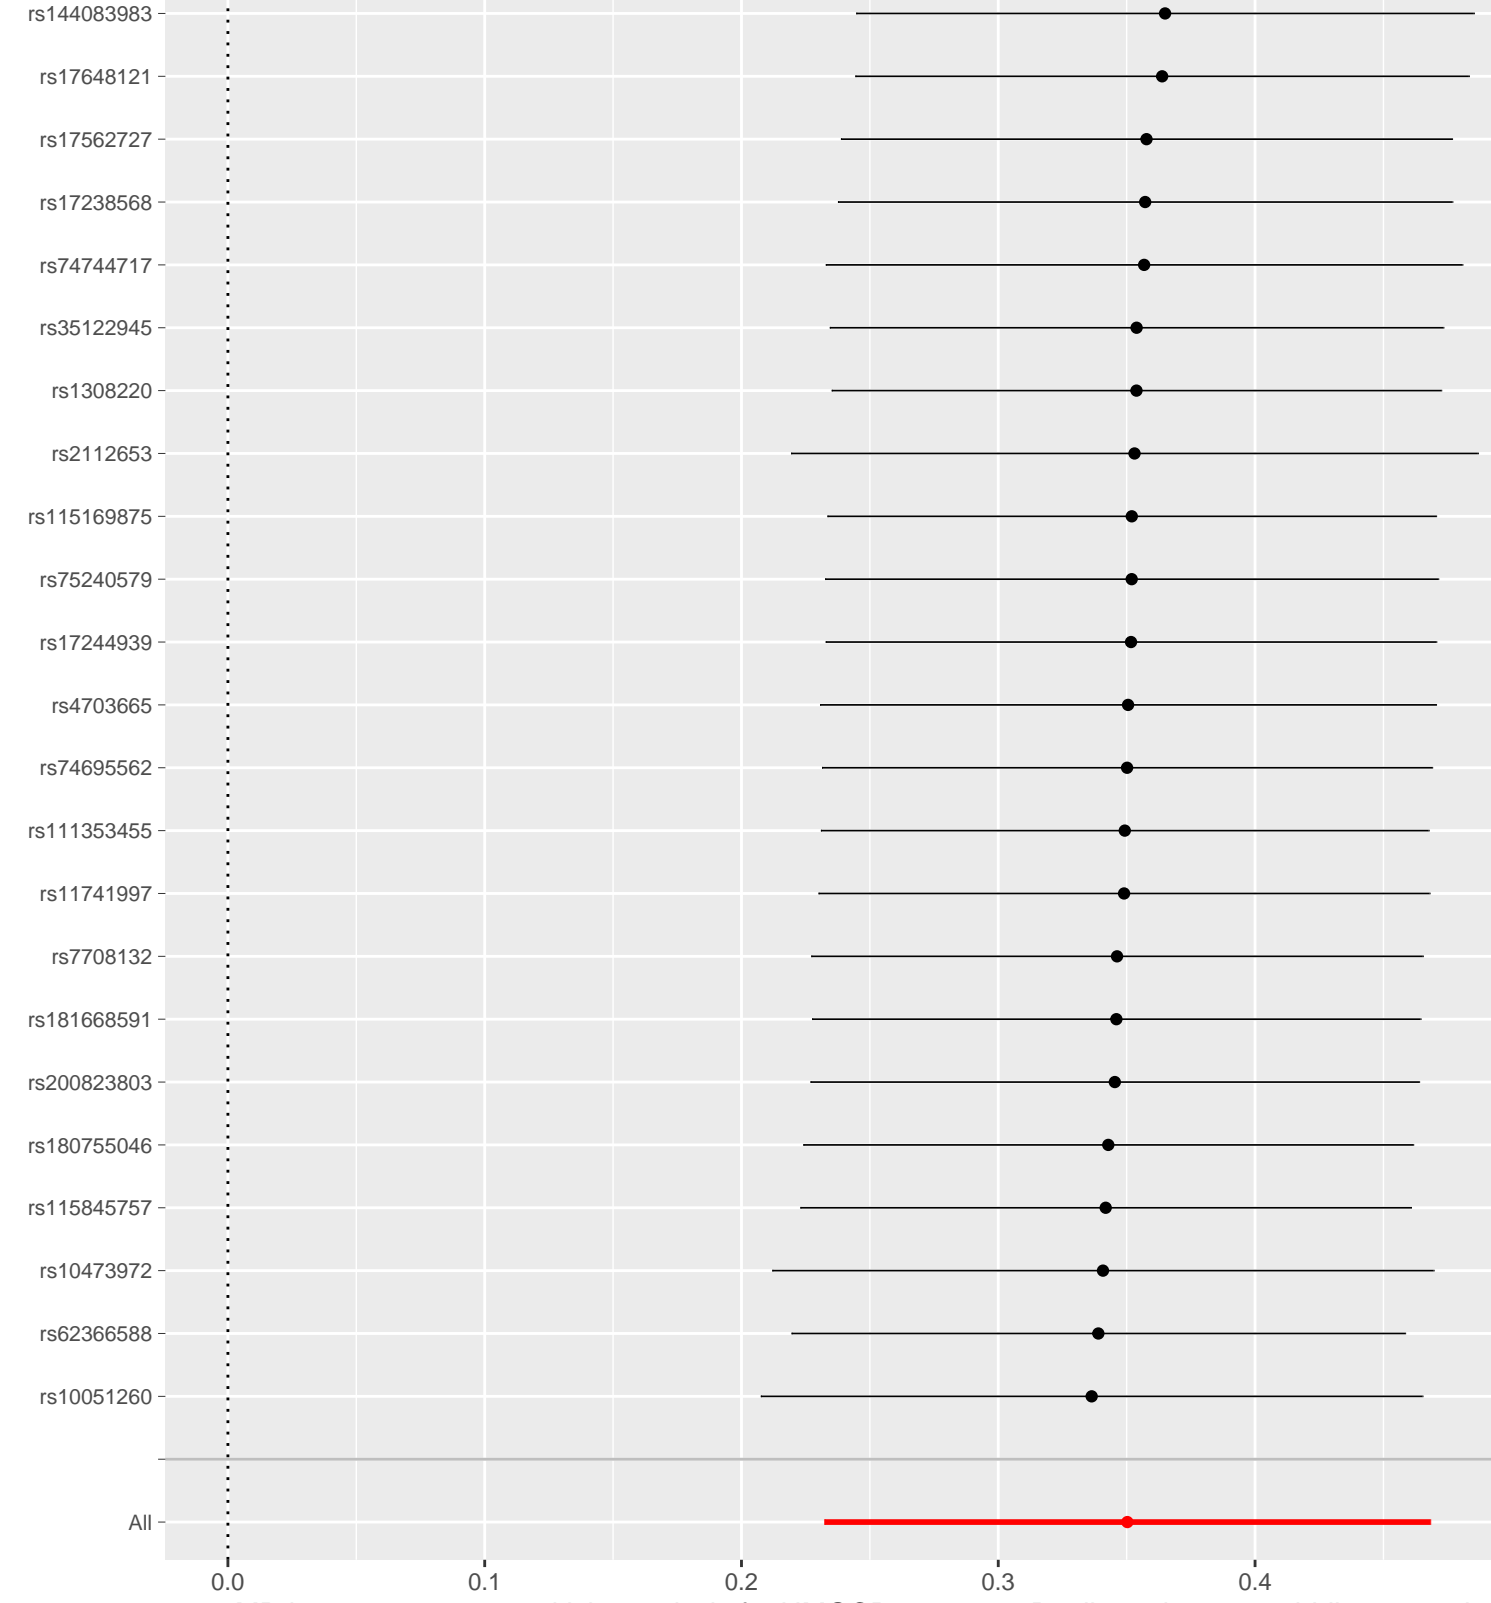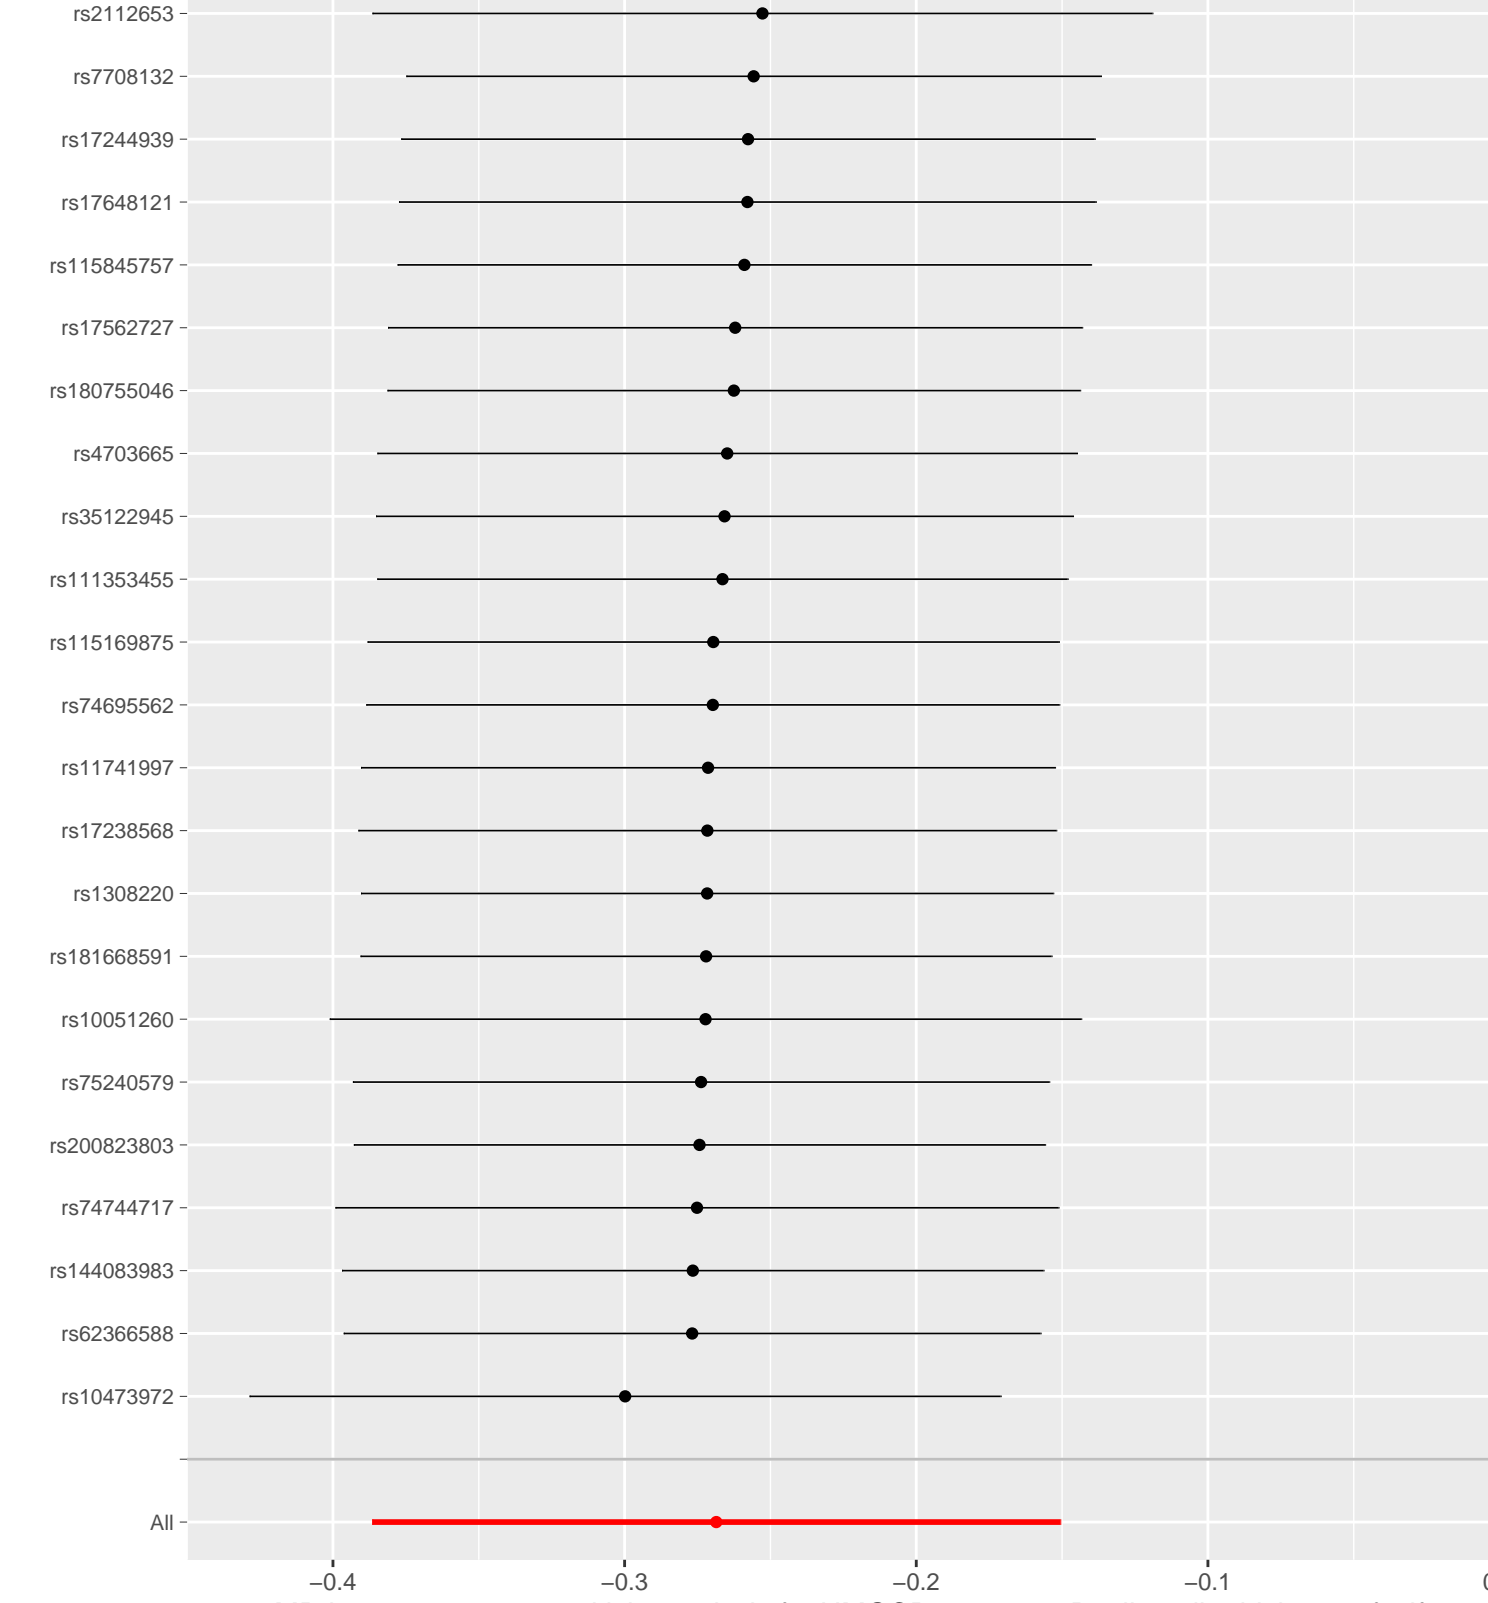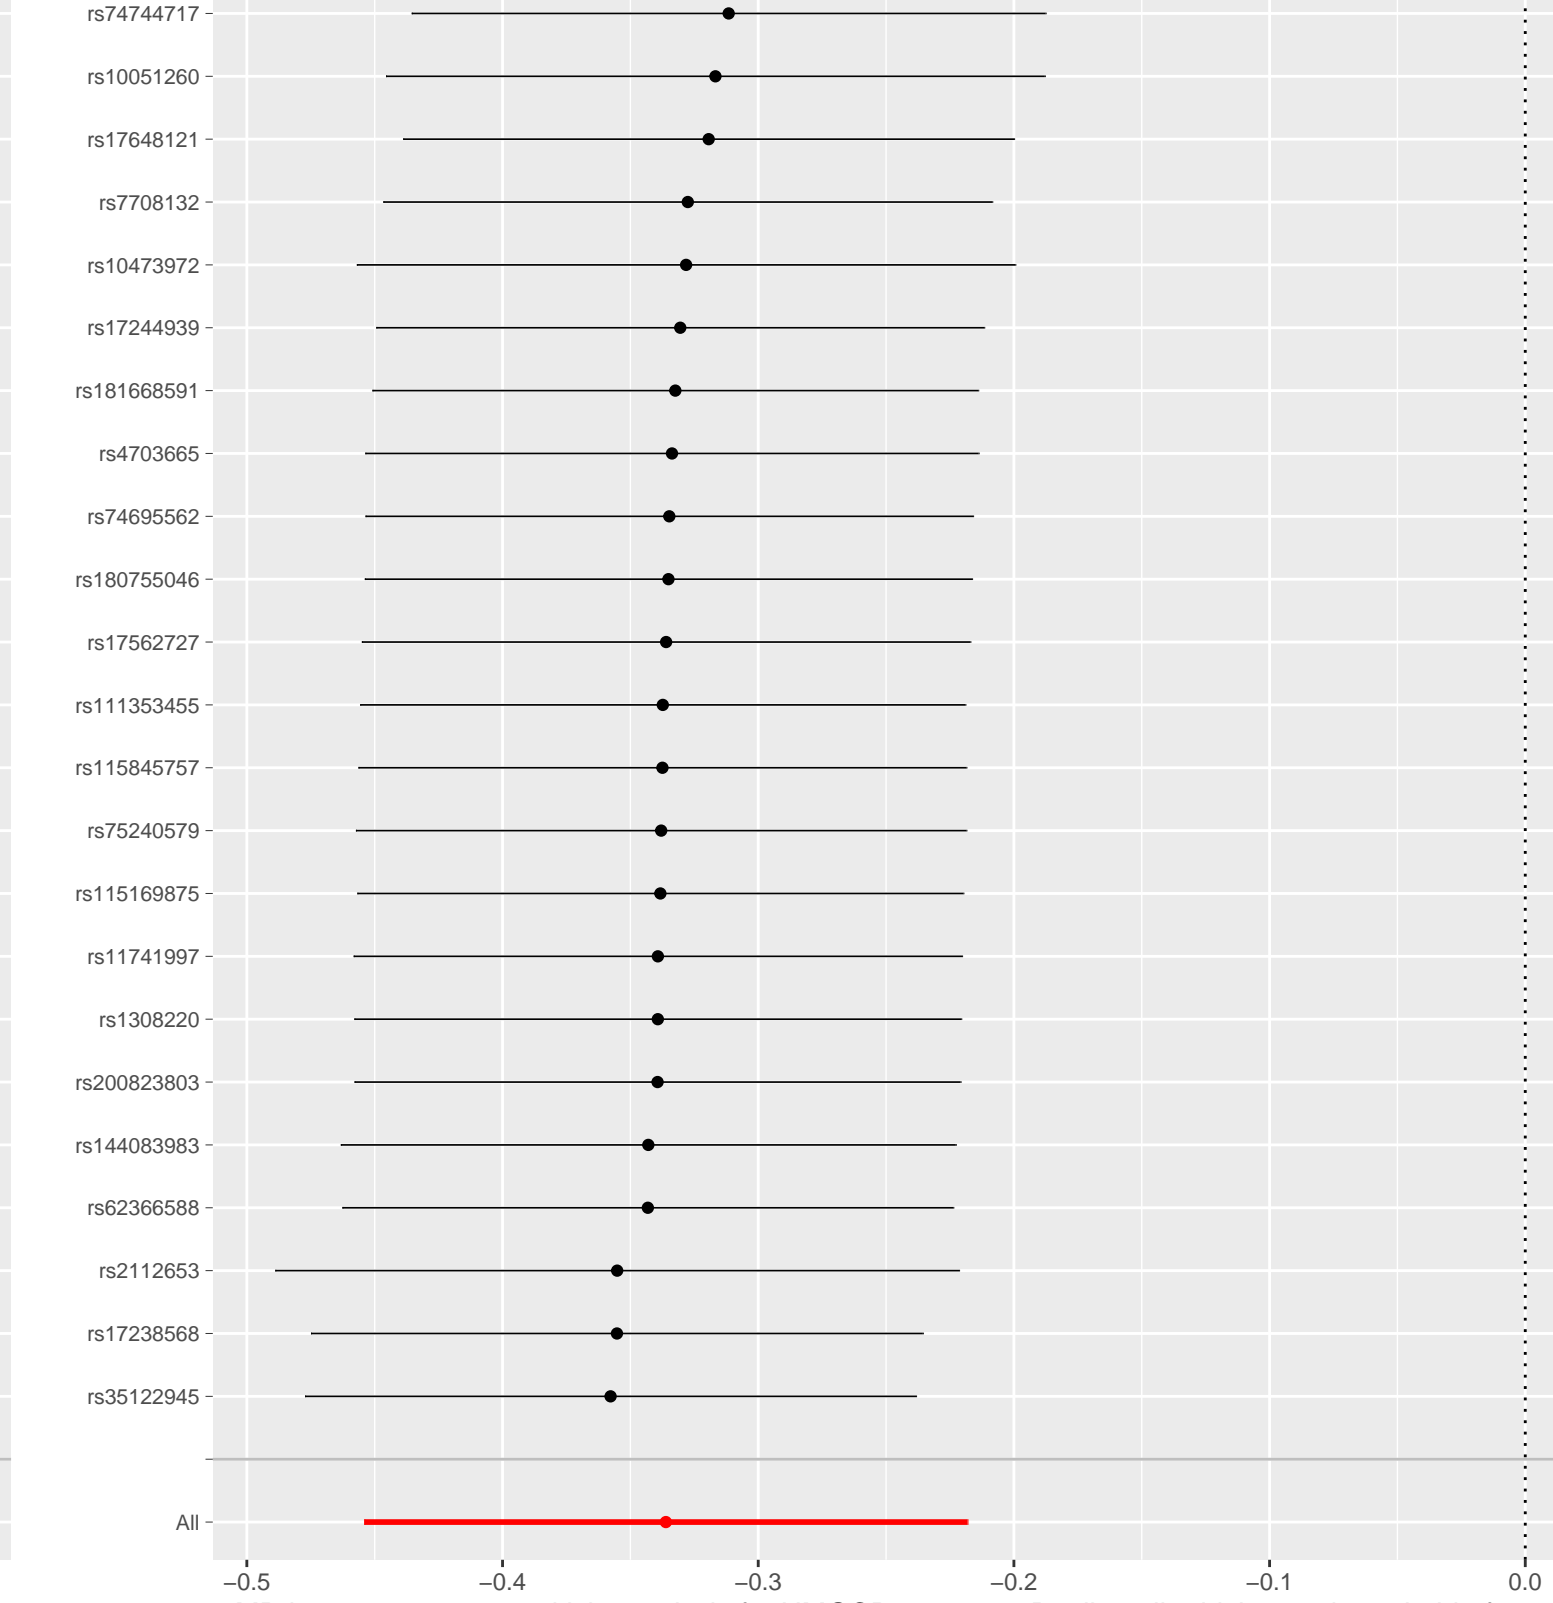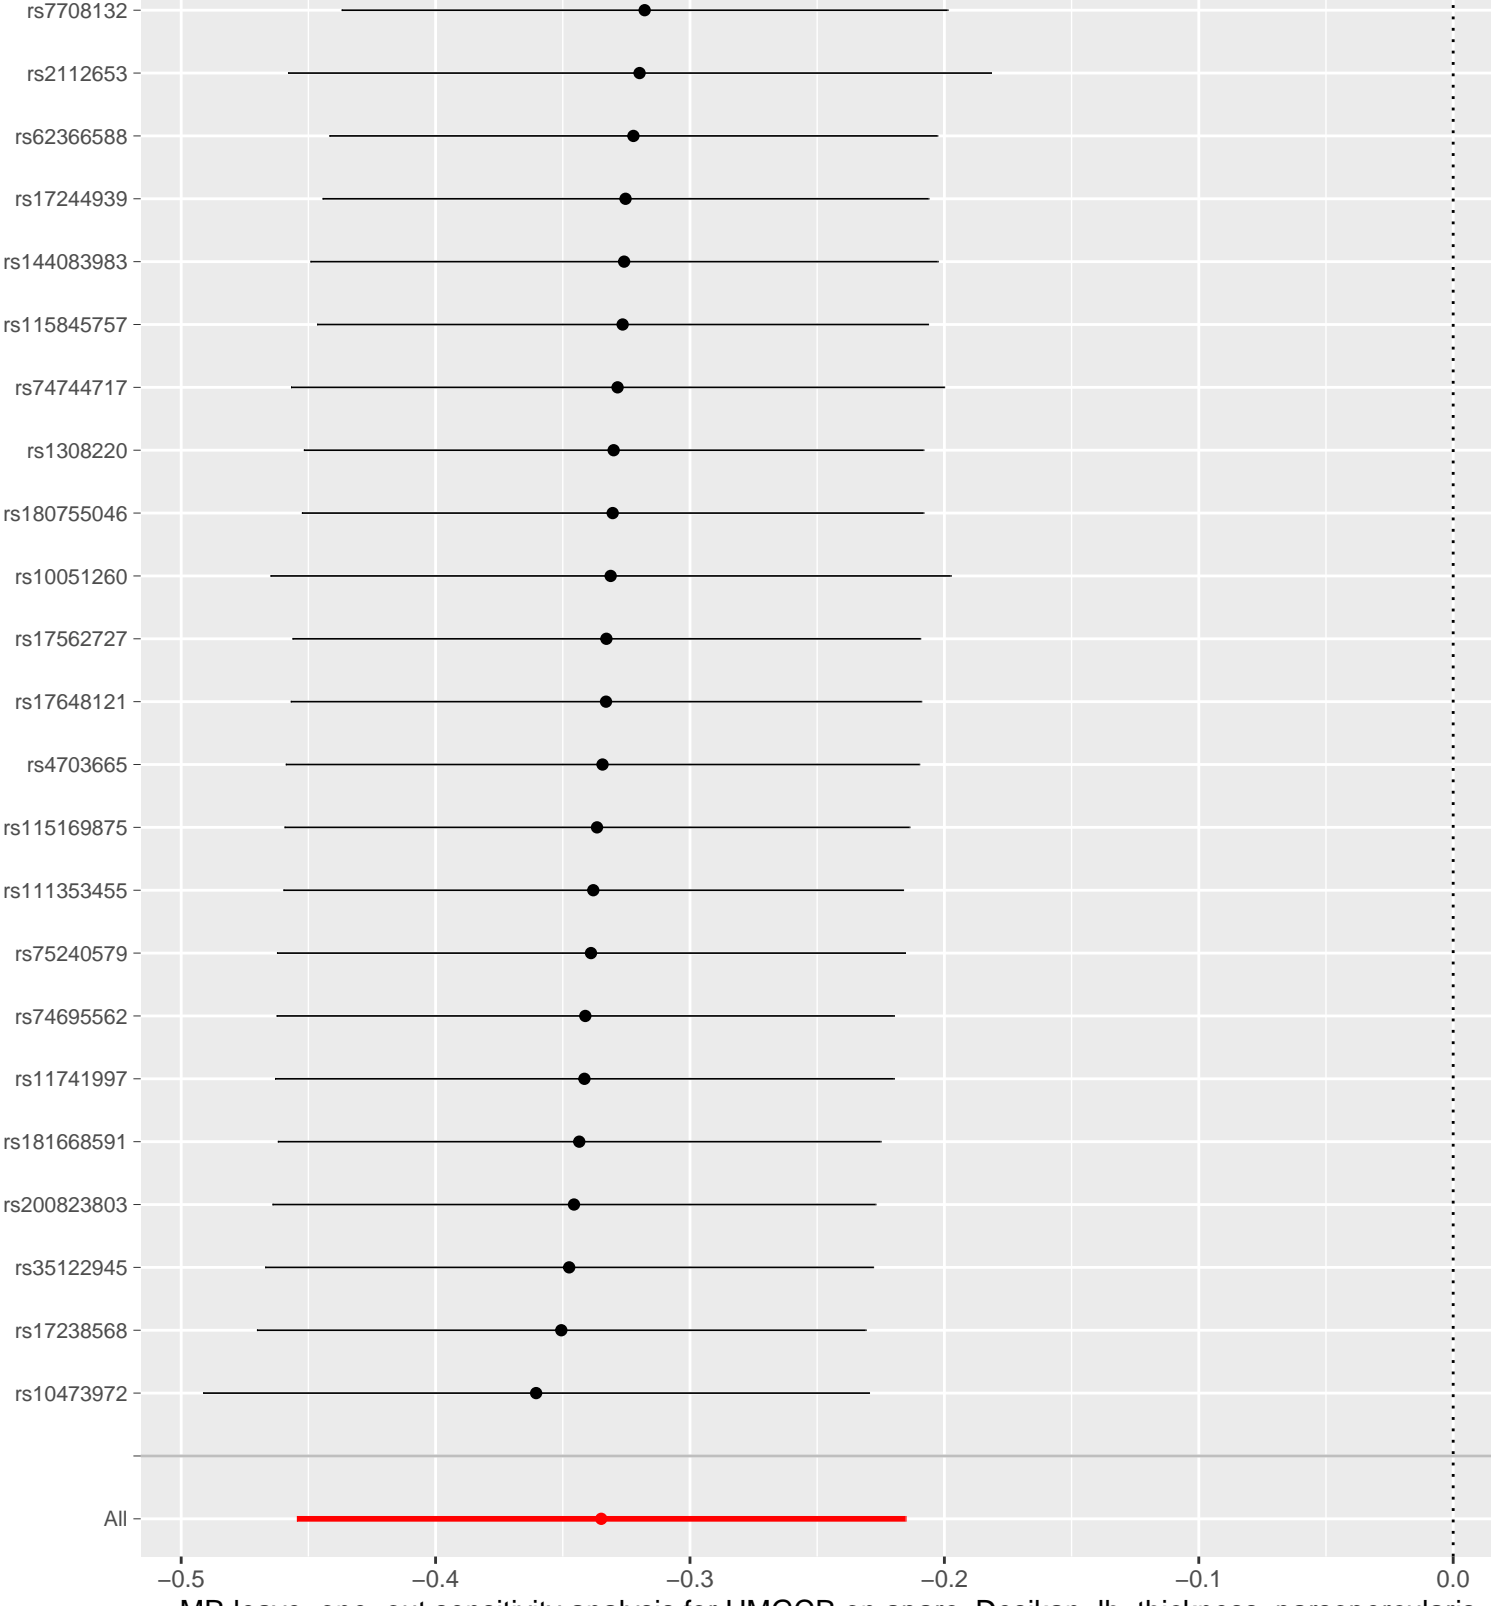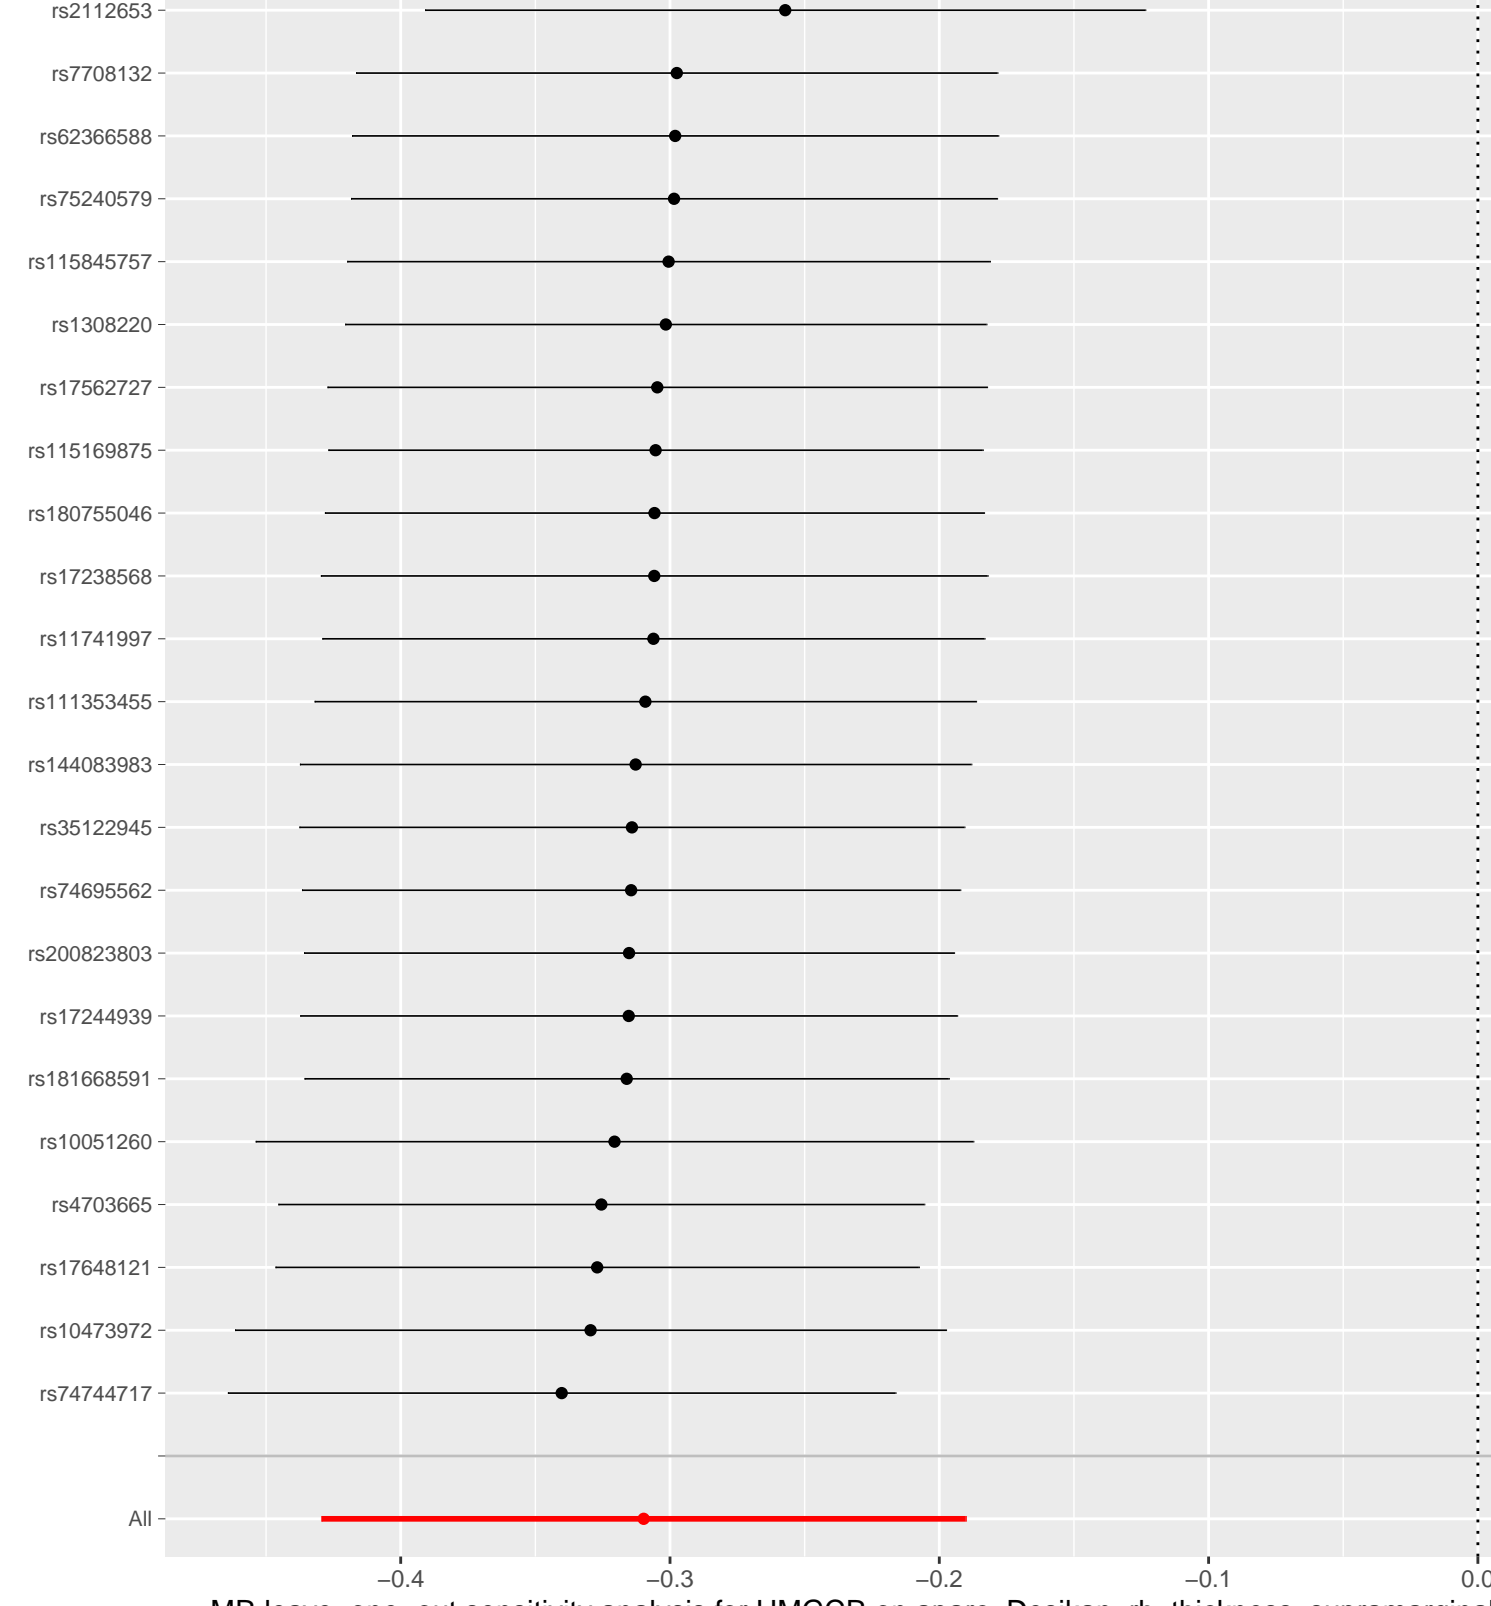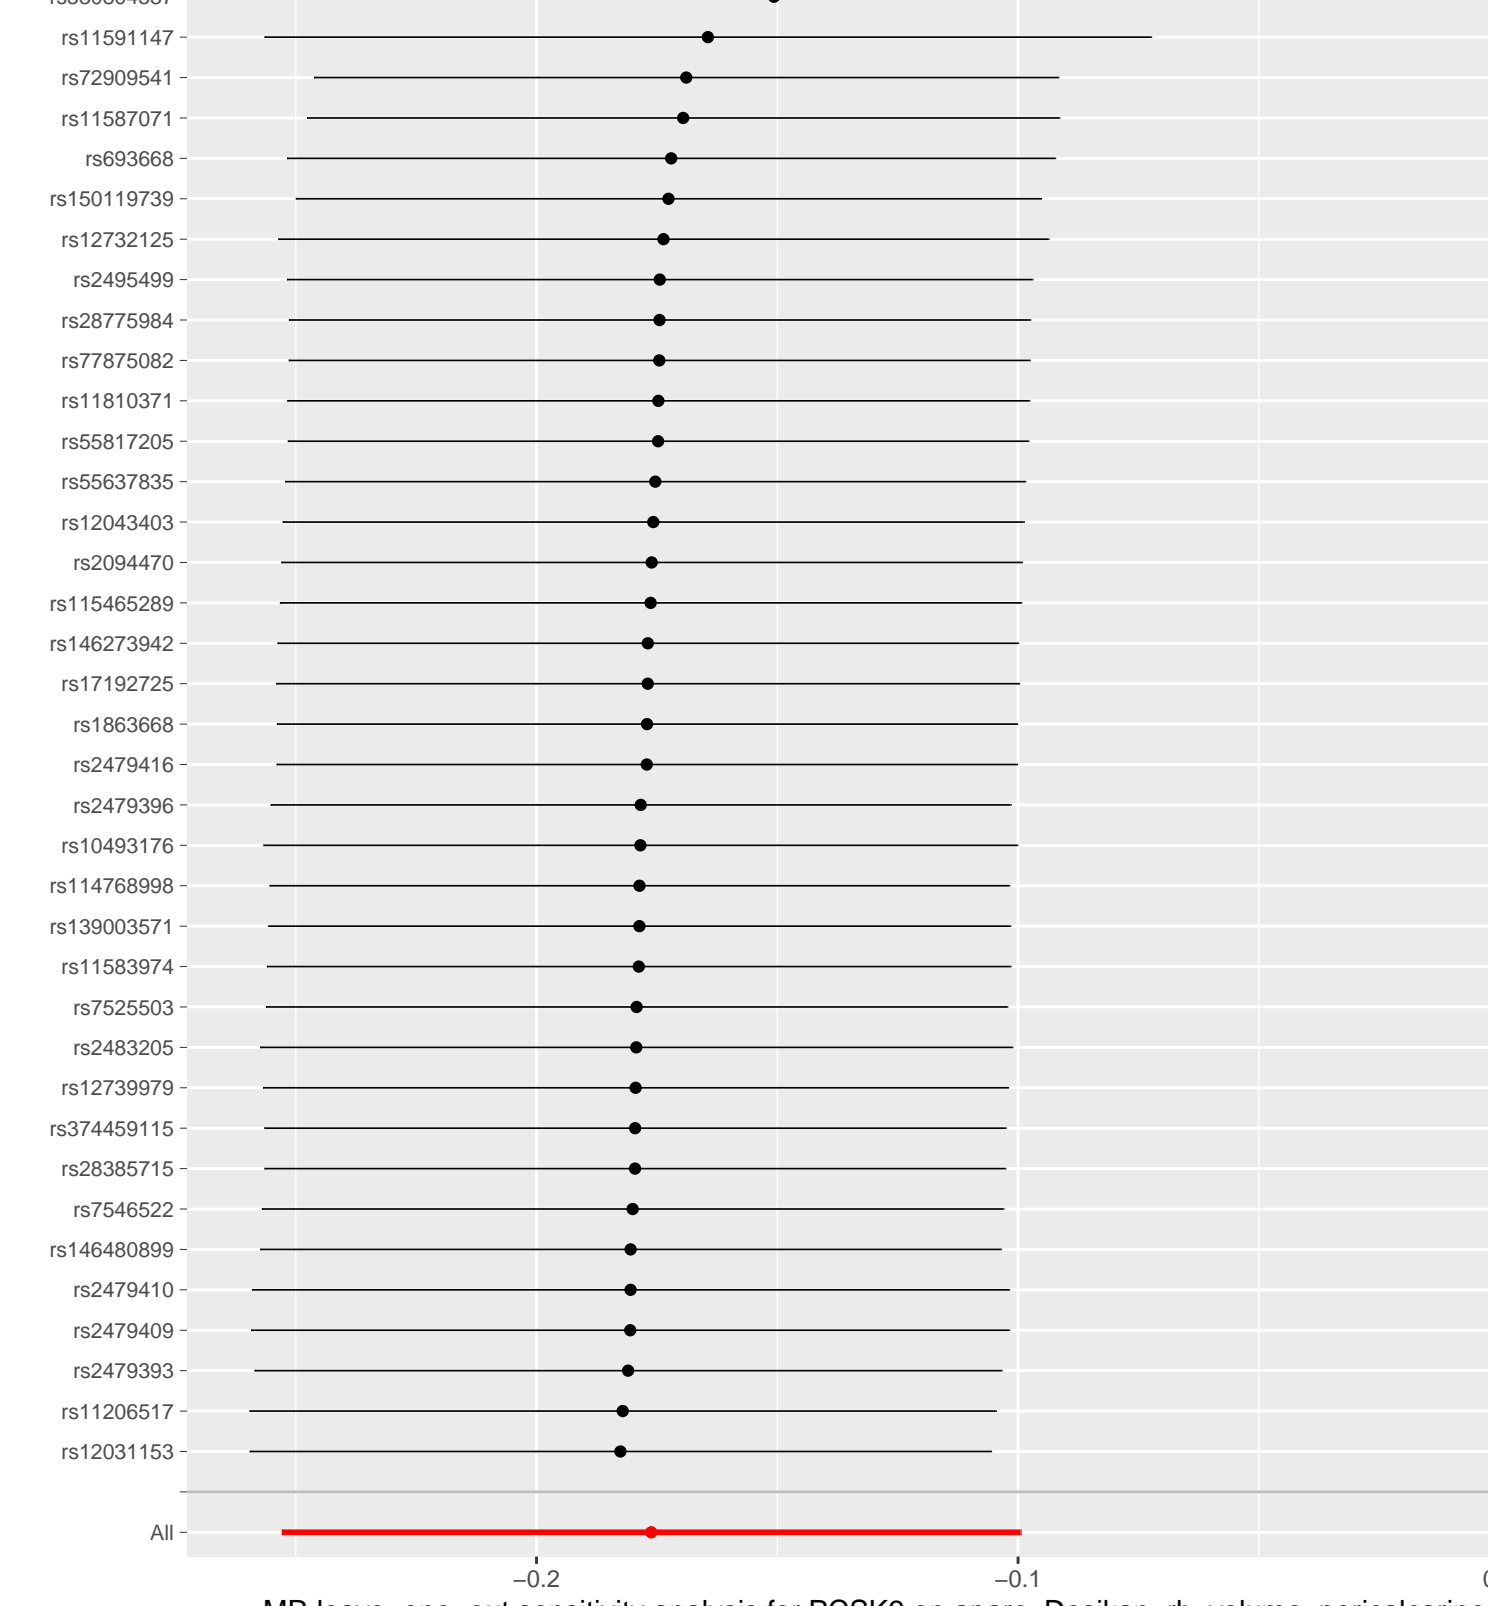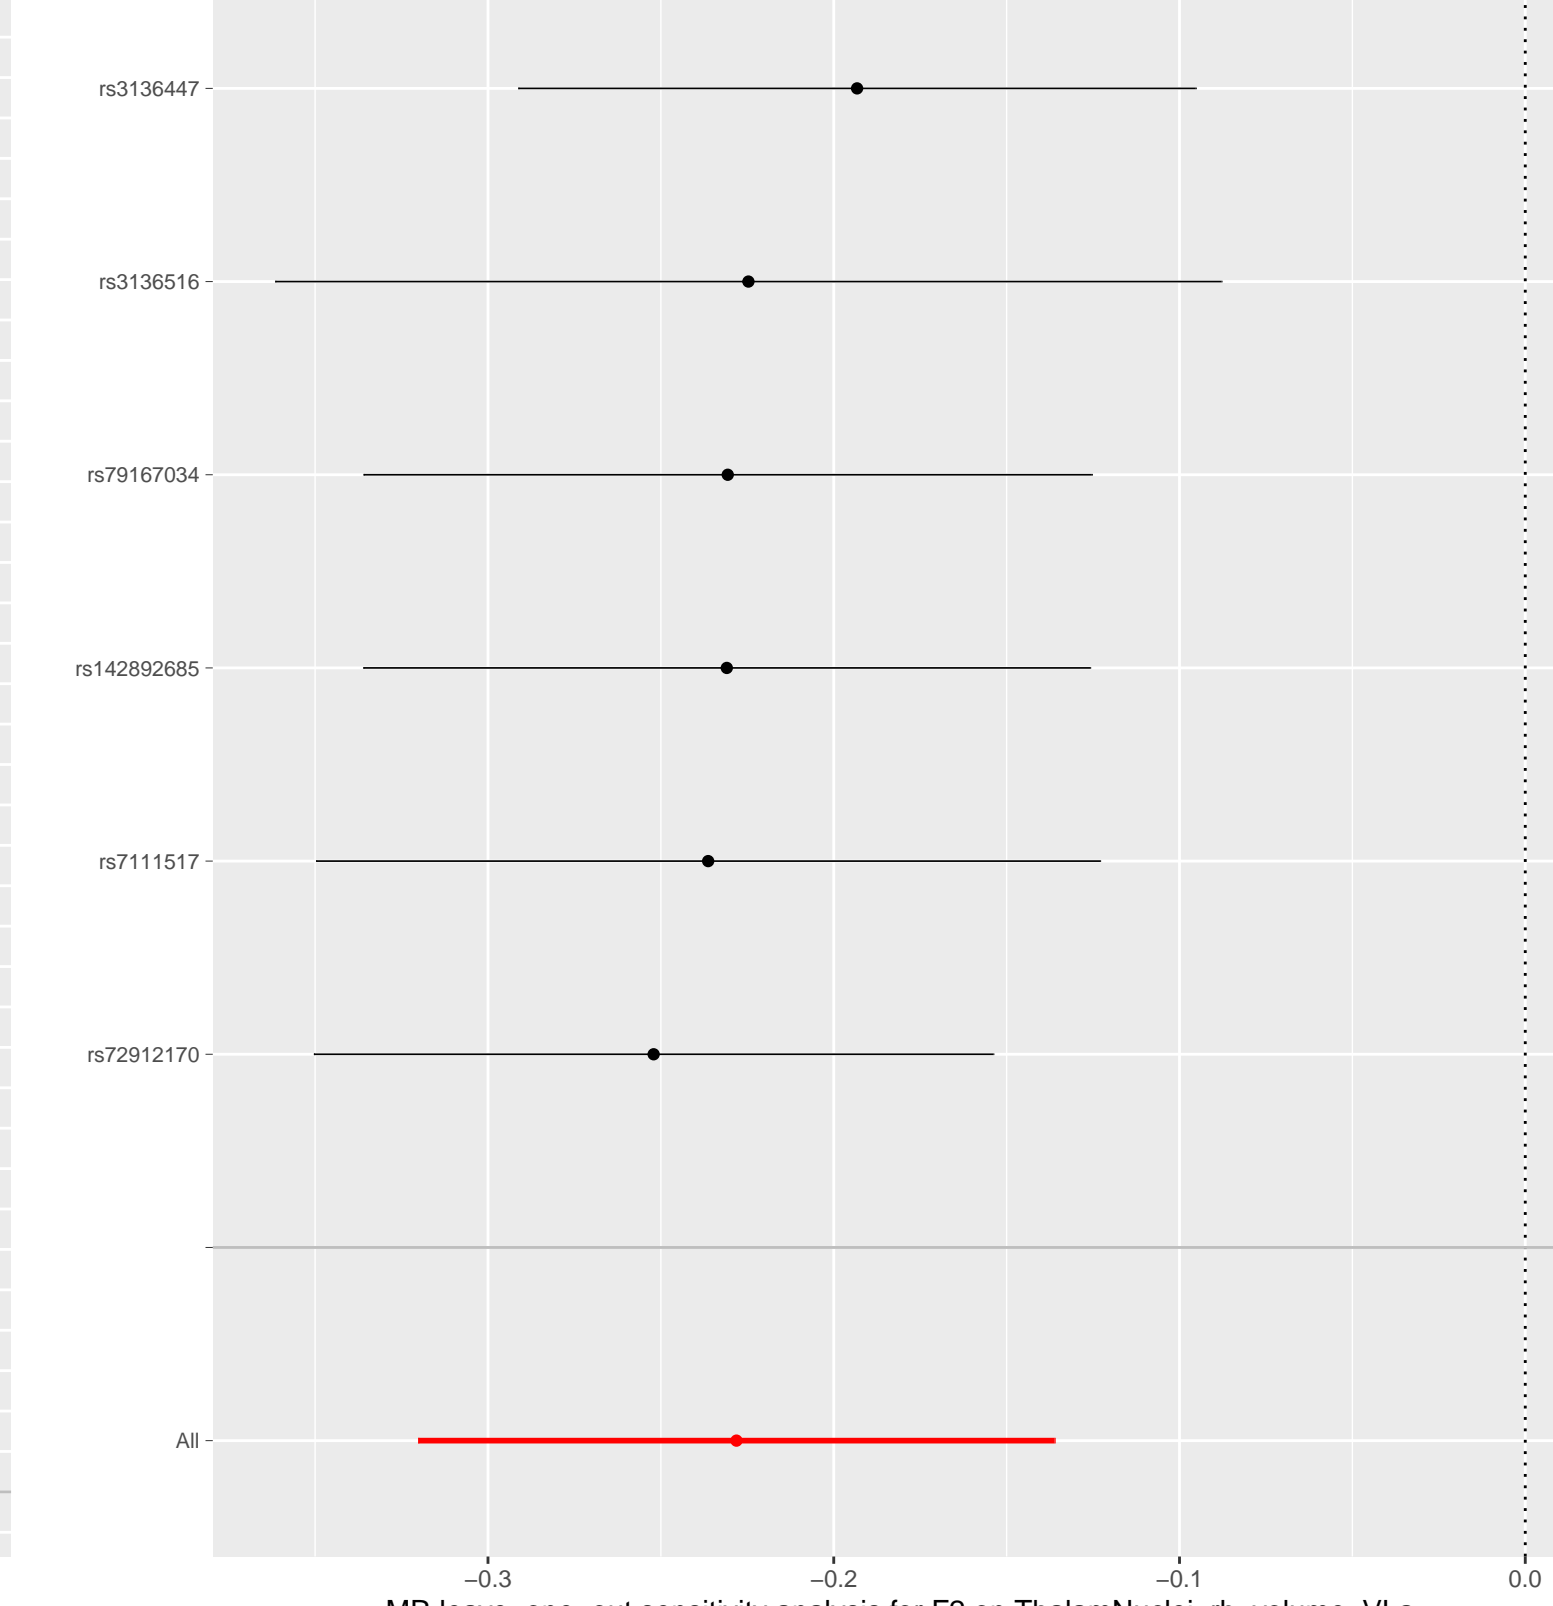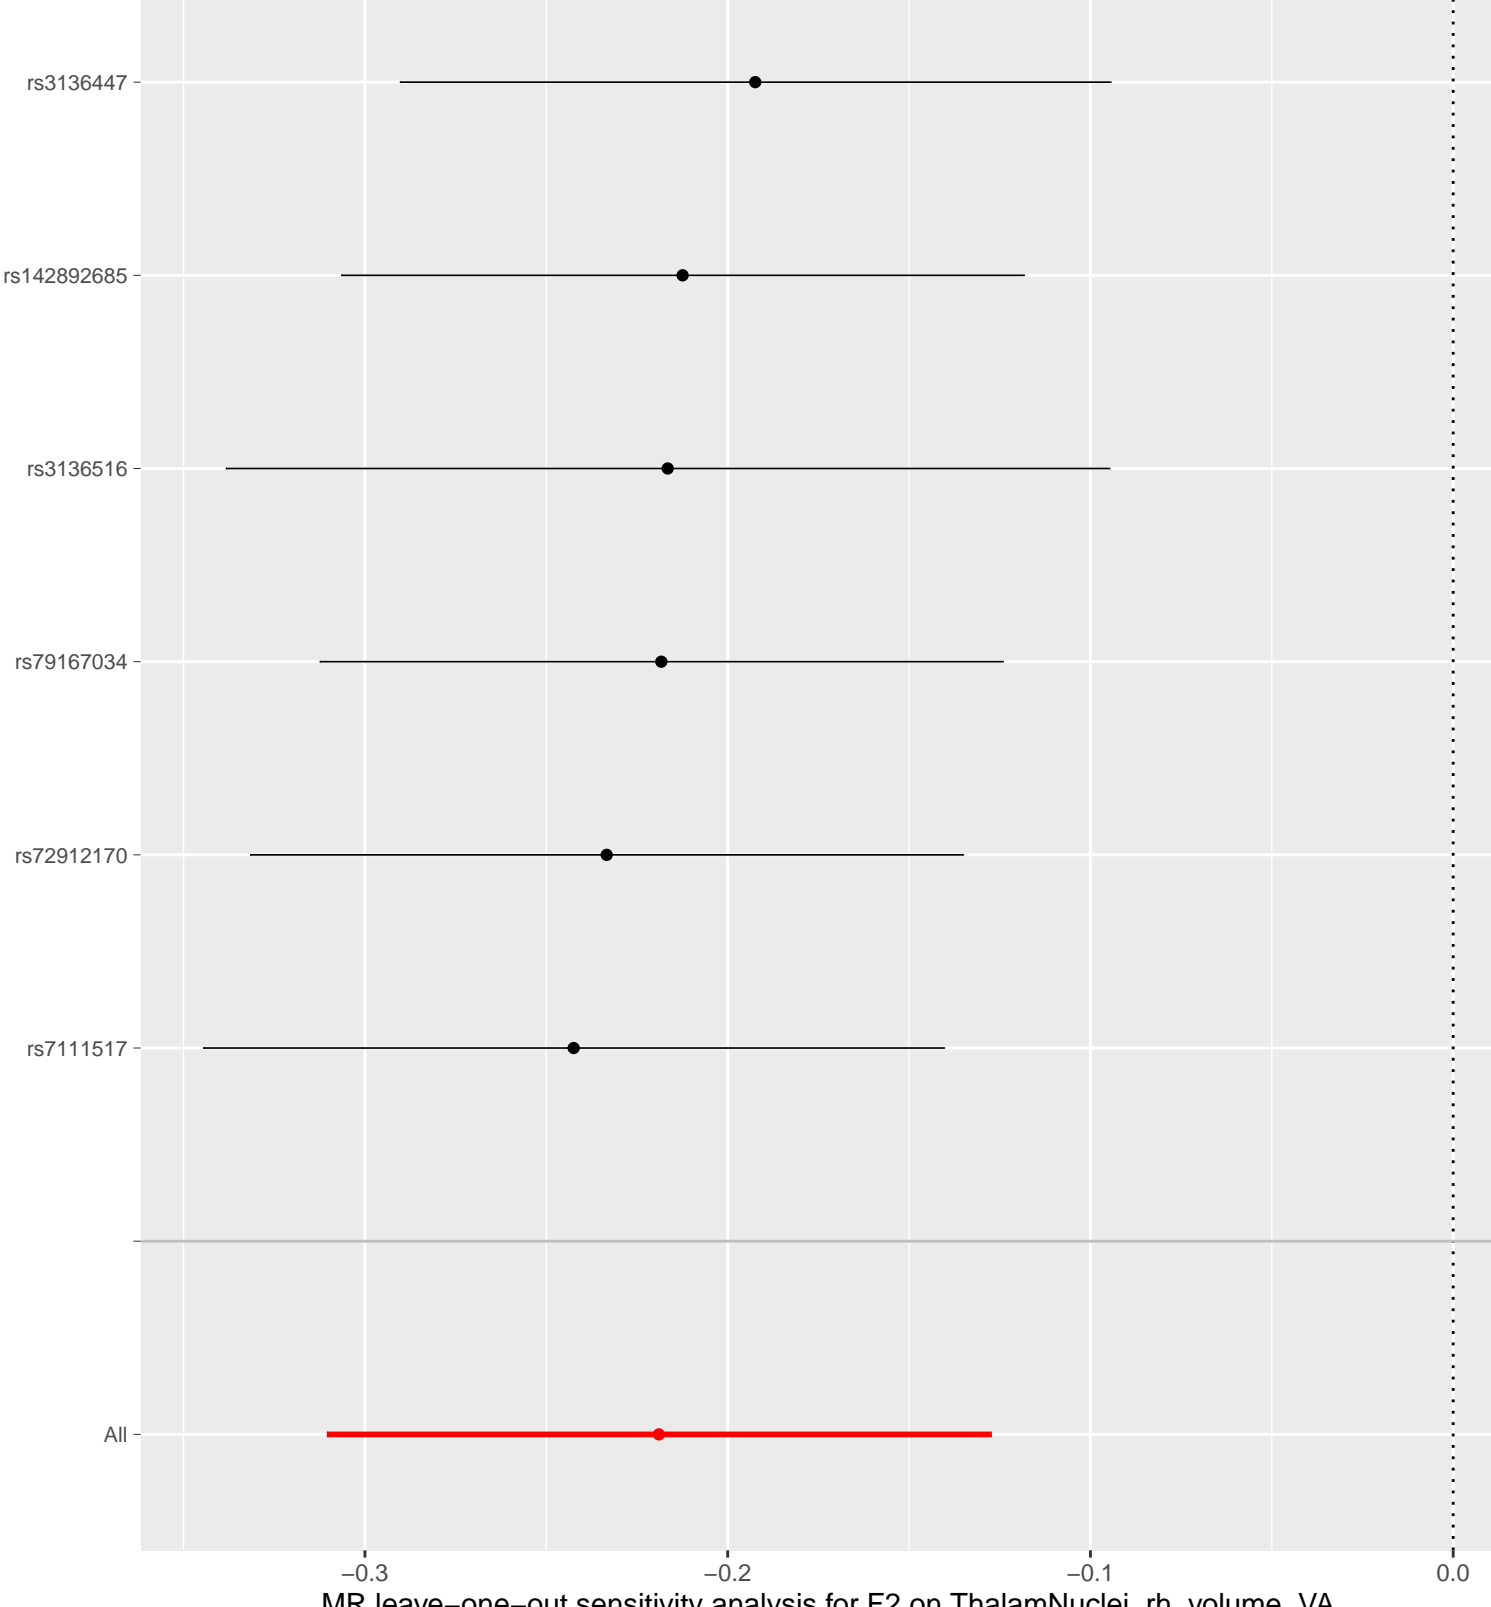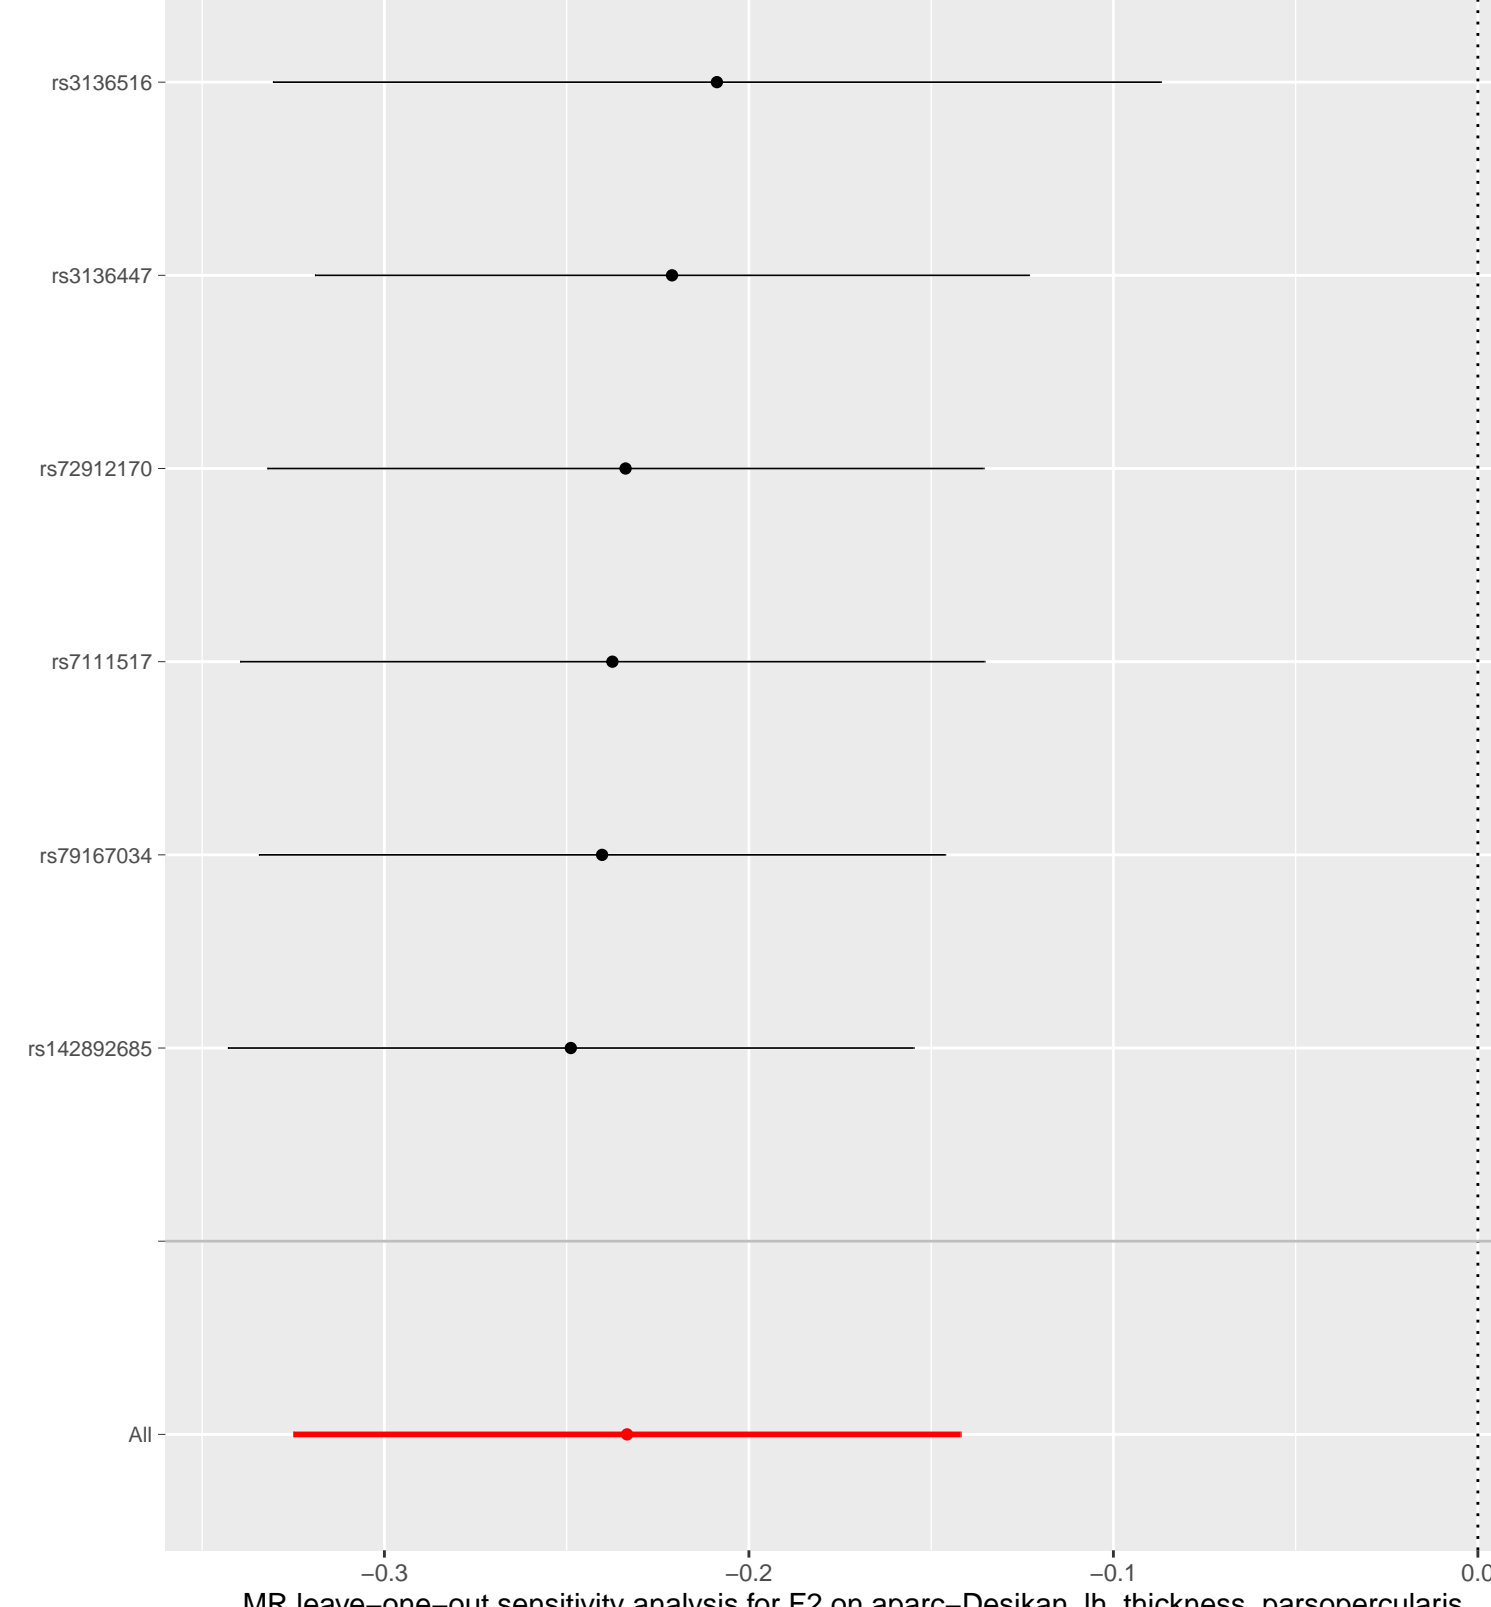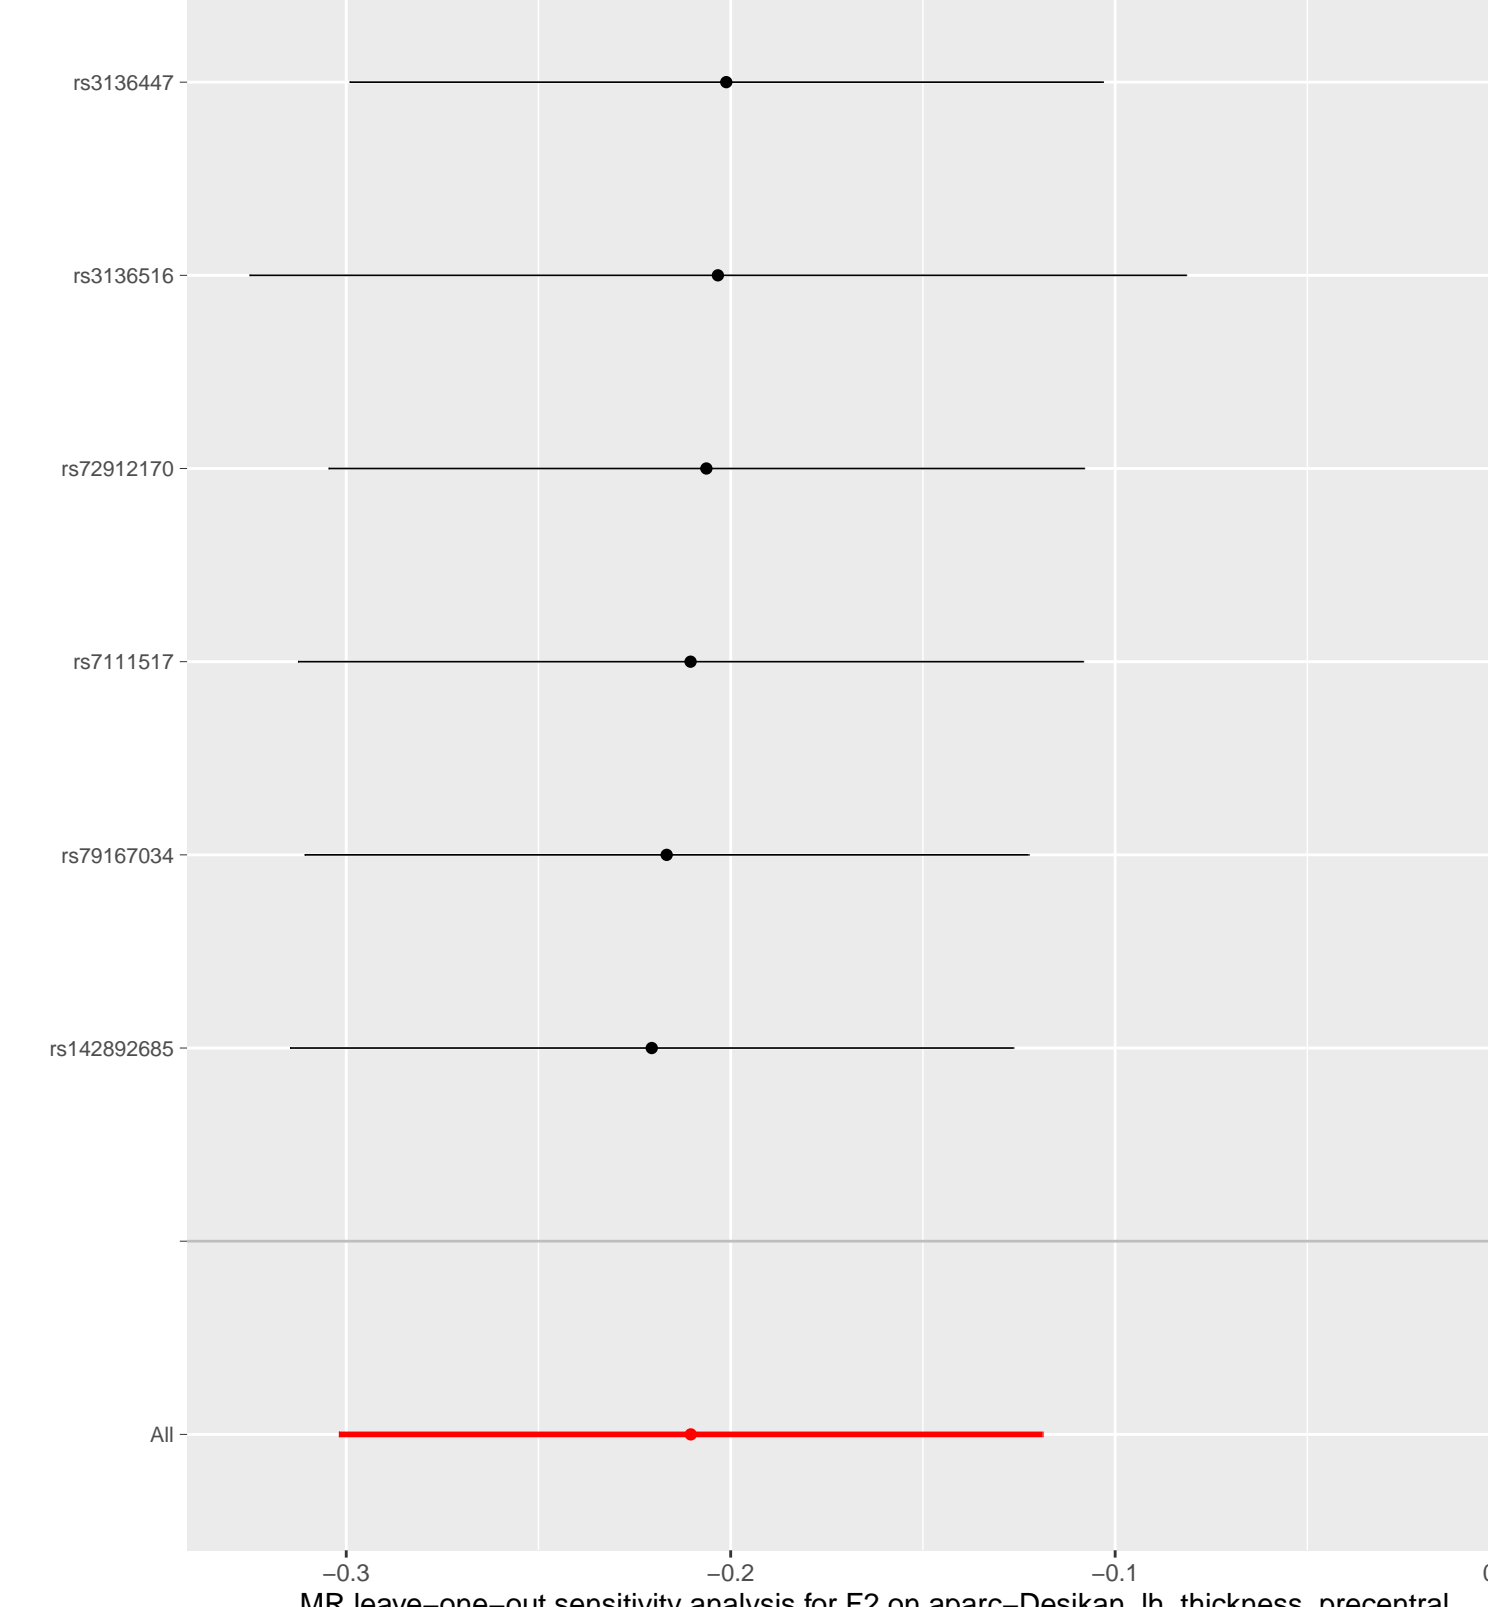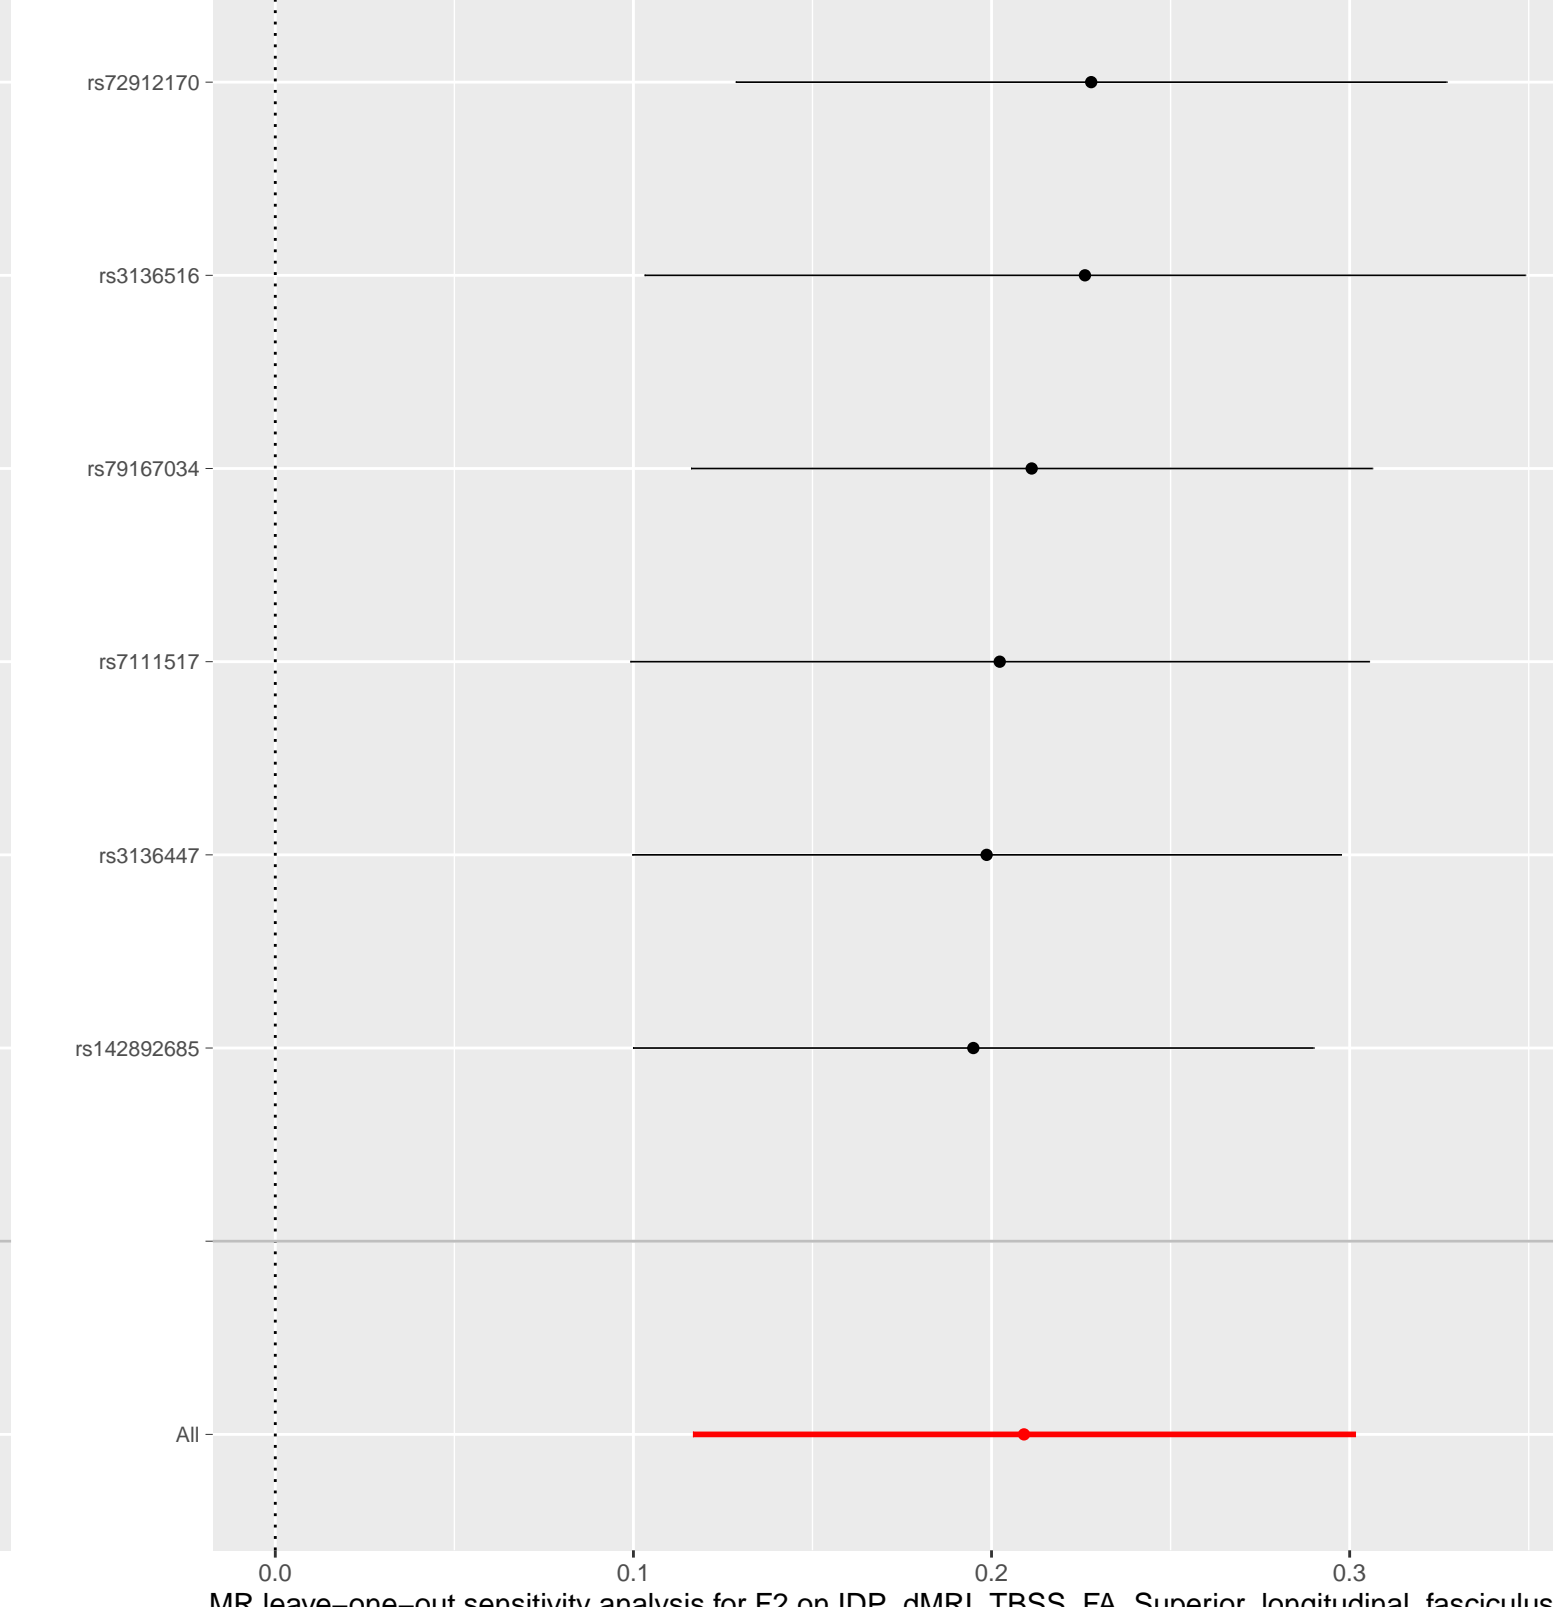

Supplement: mmc6.pdf [file mmc6.pdf]

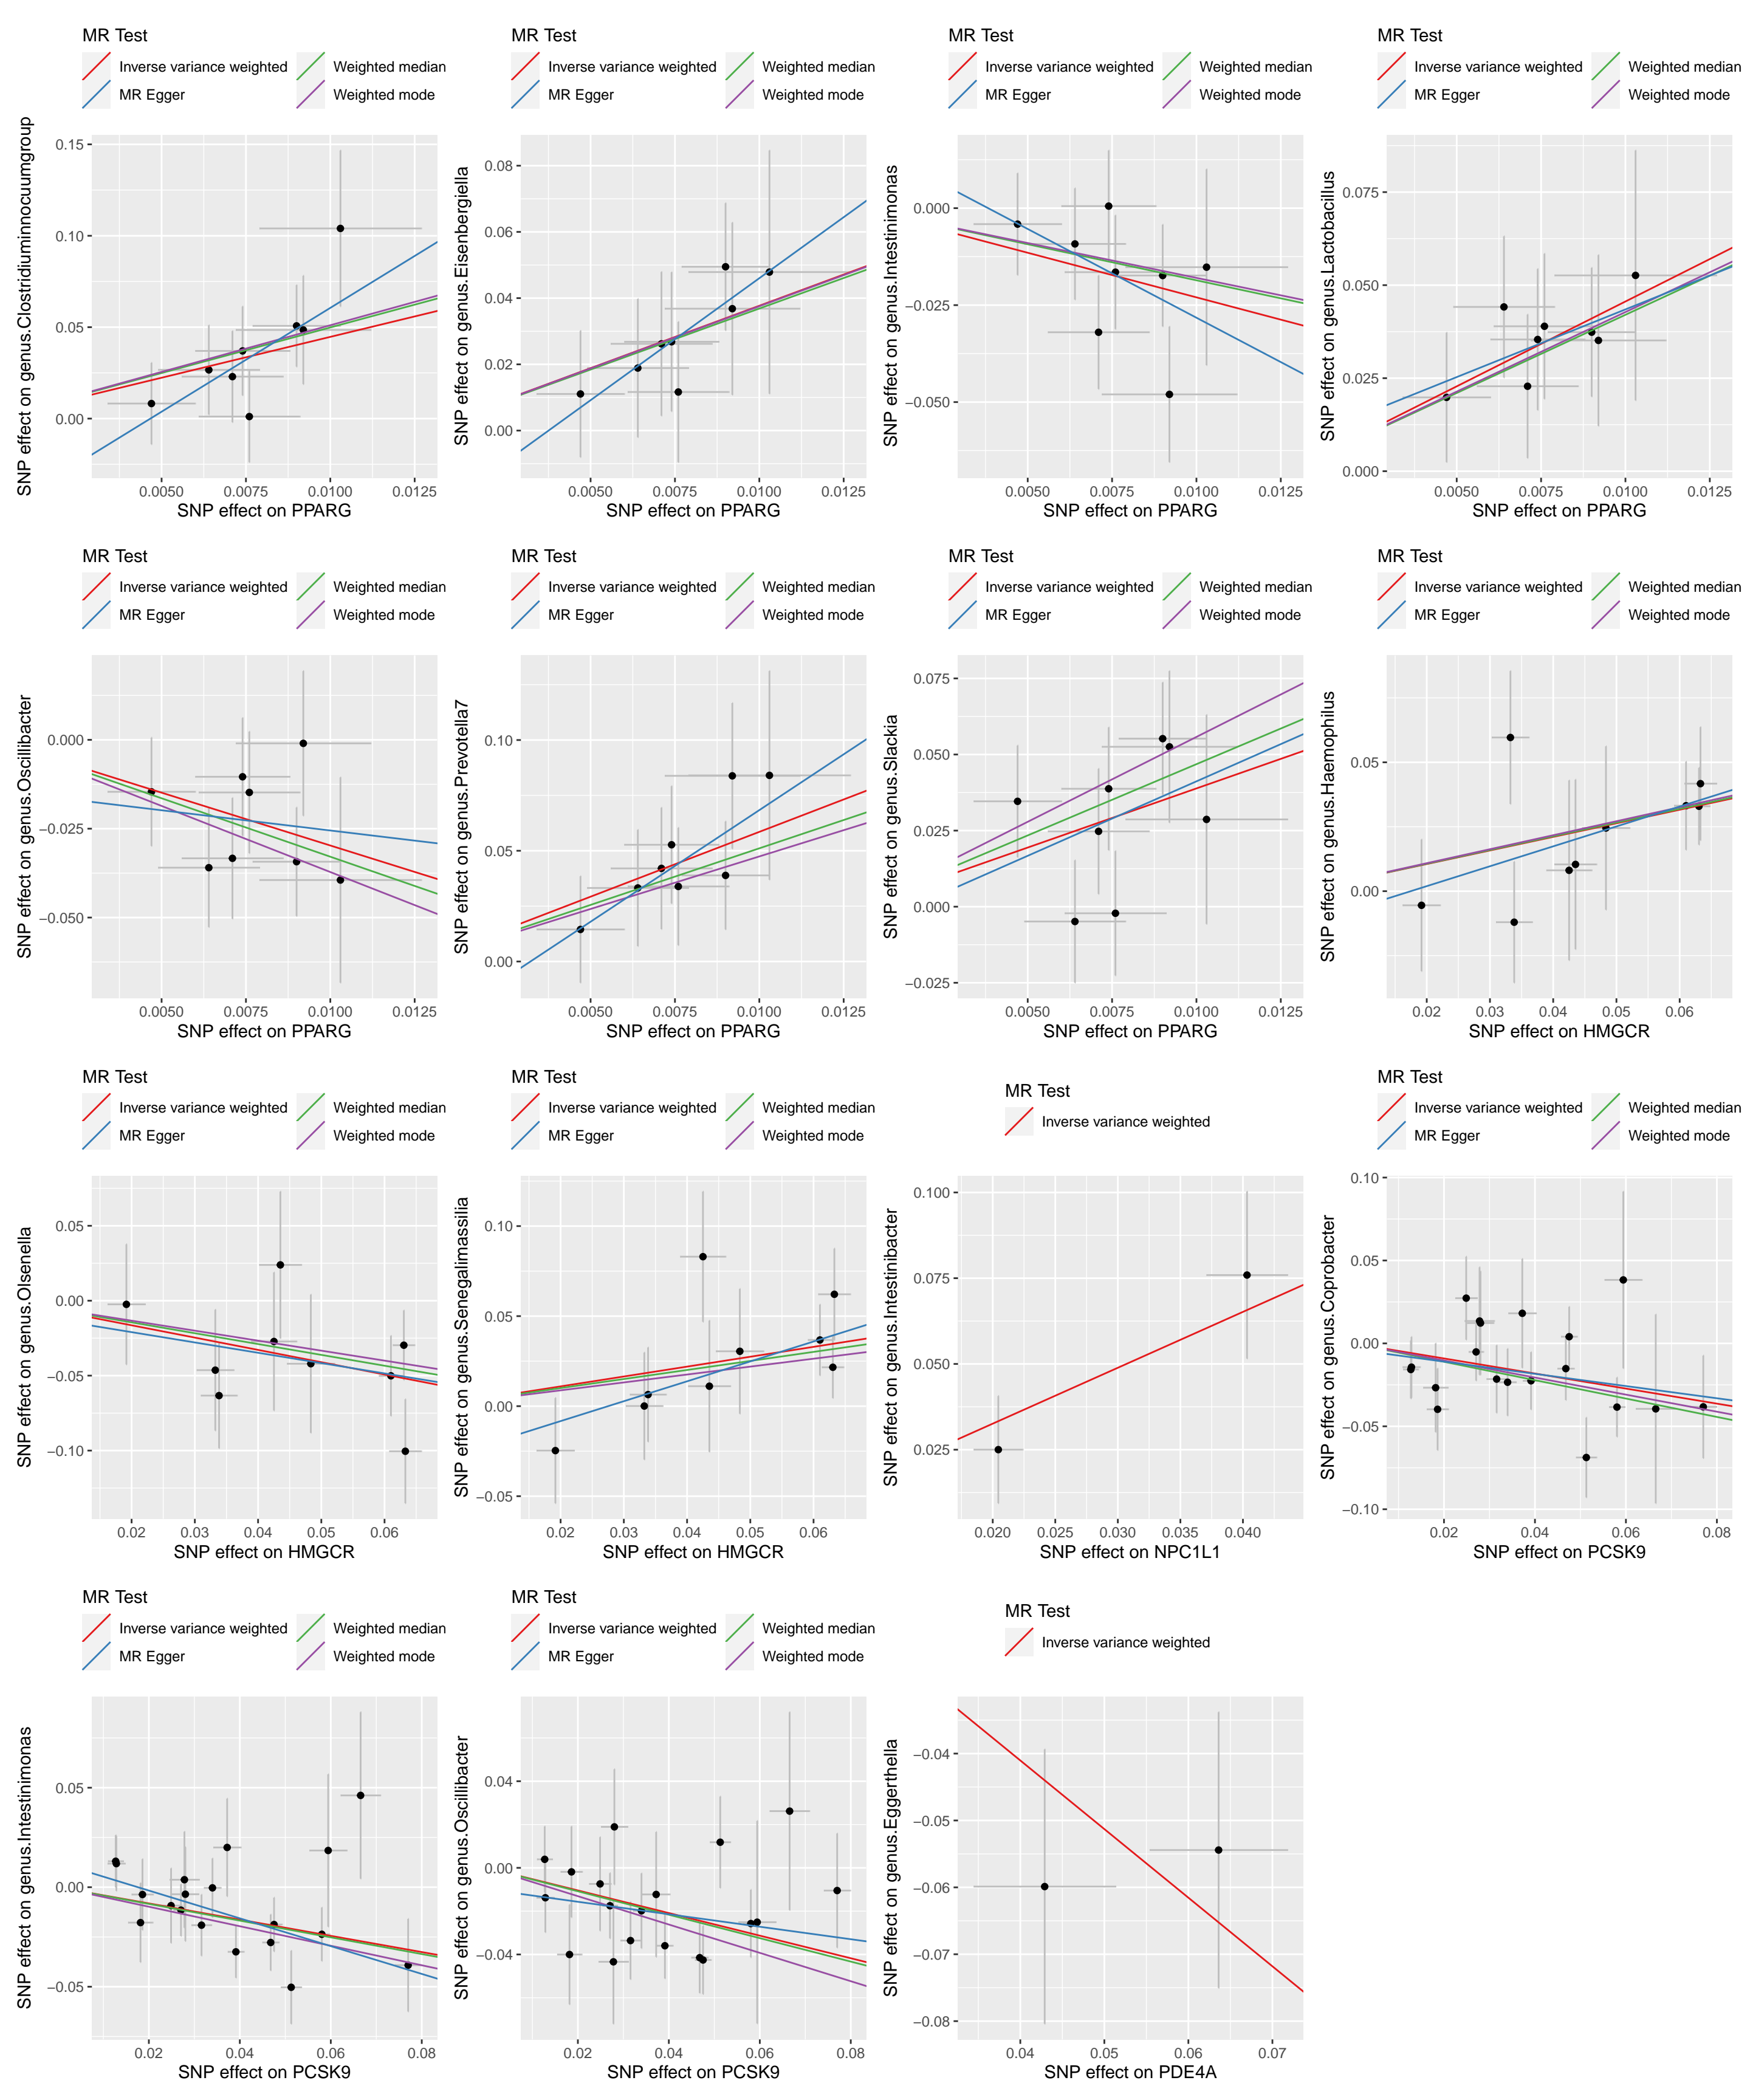

Supplement: mmc7.pdf [file mmc7.pdf]

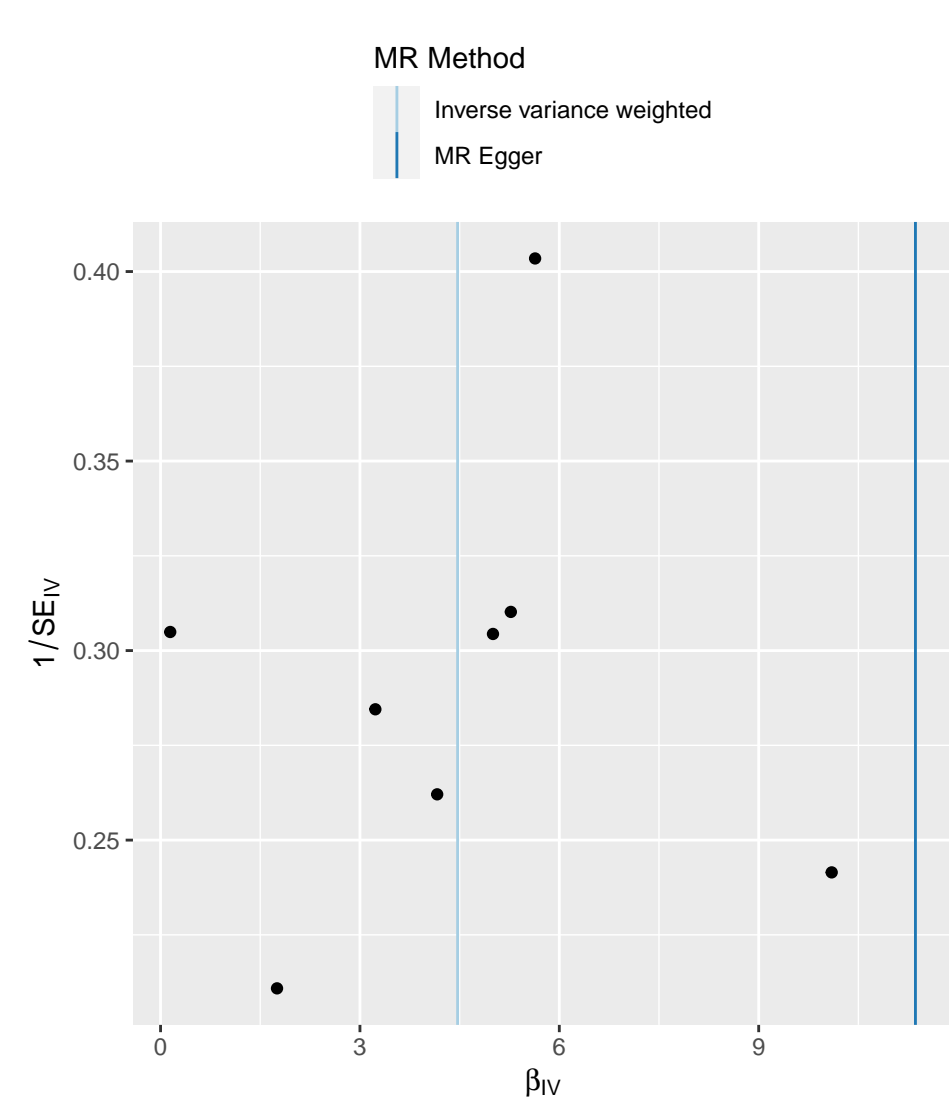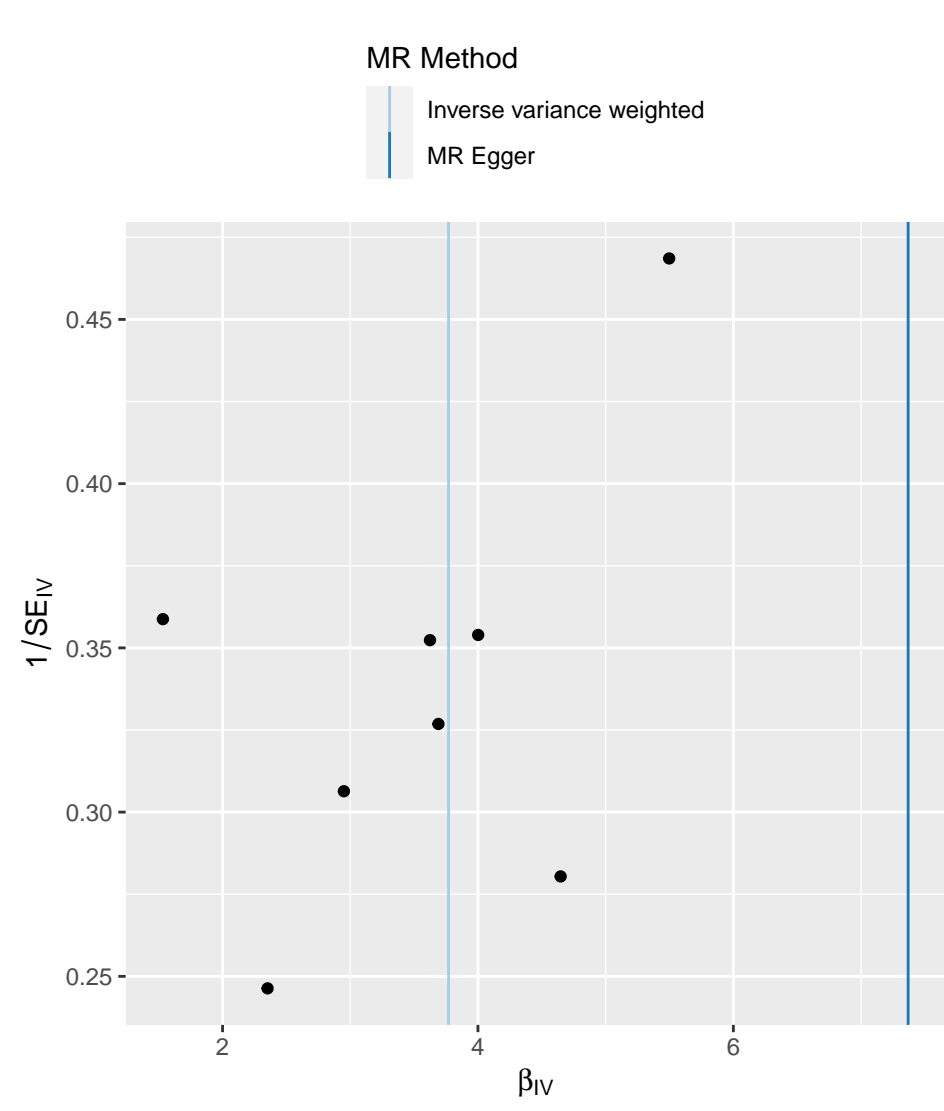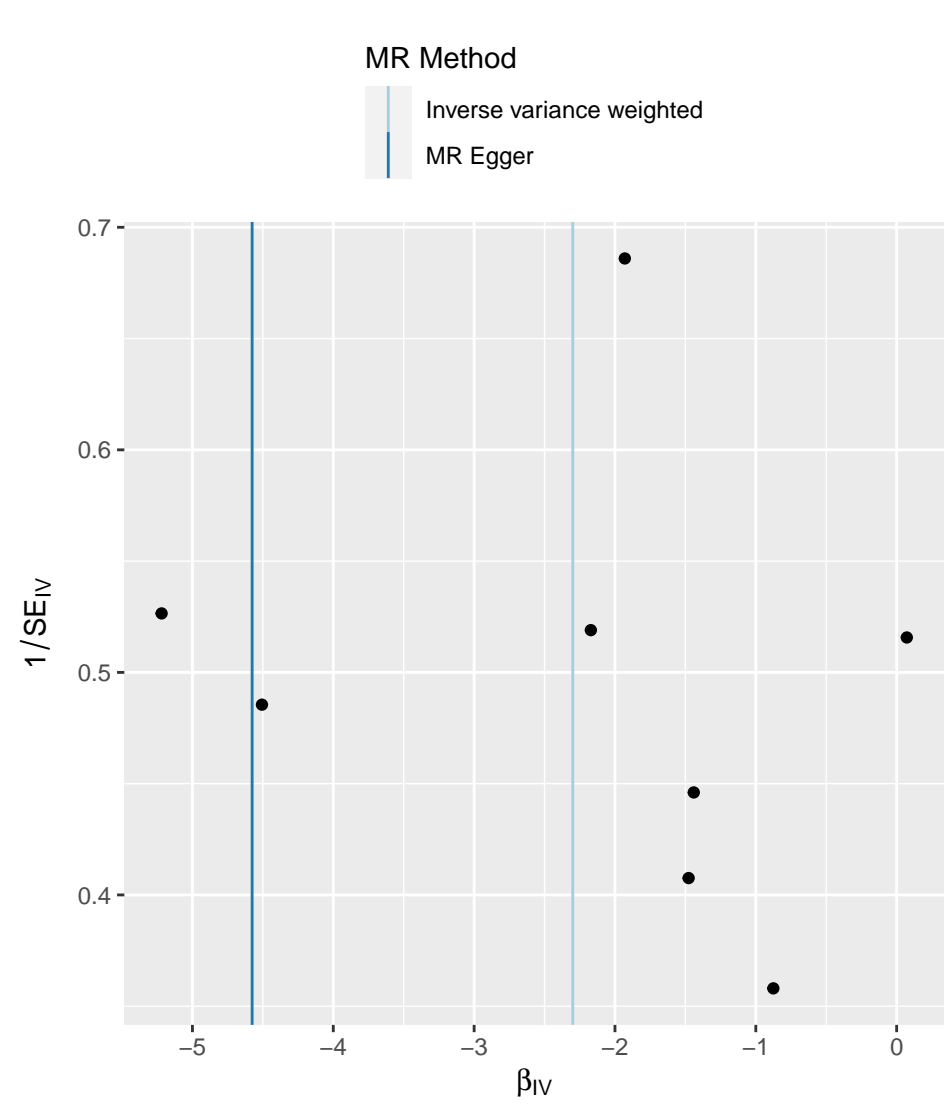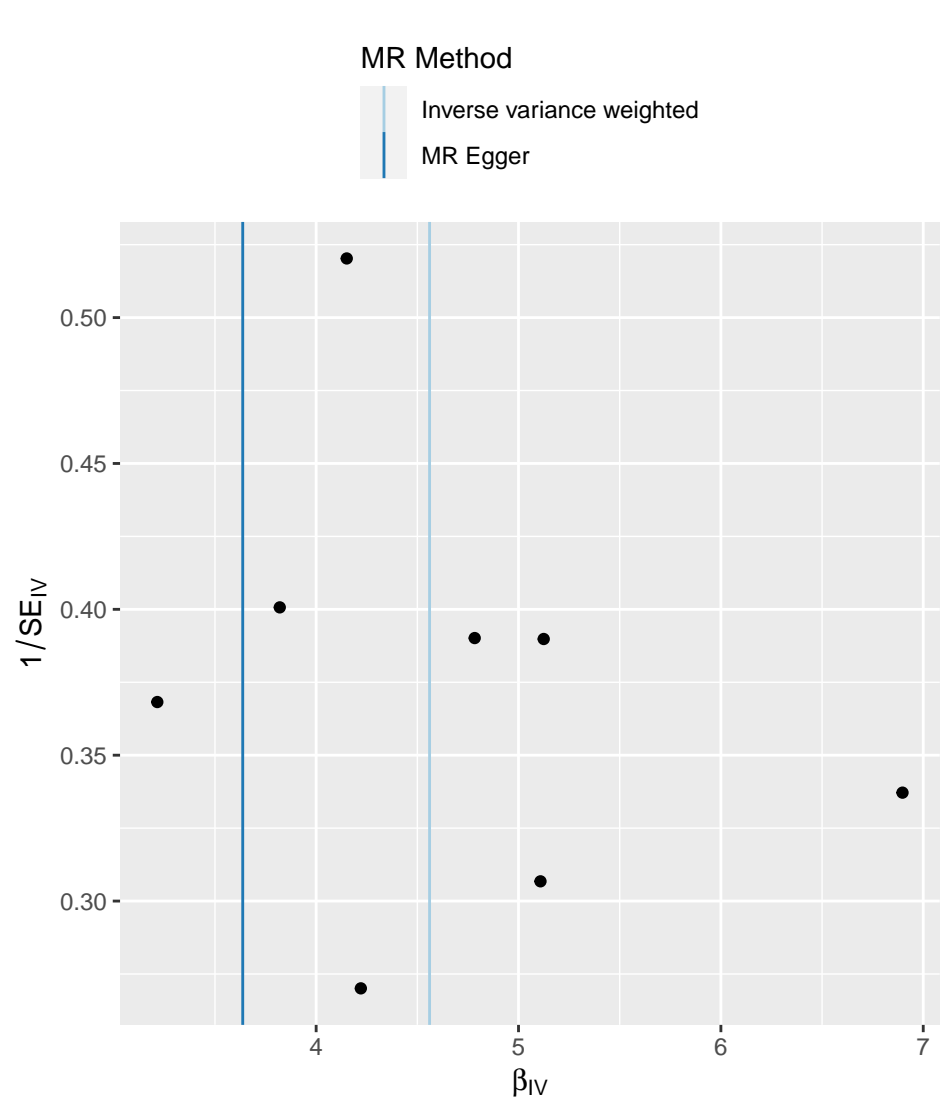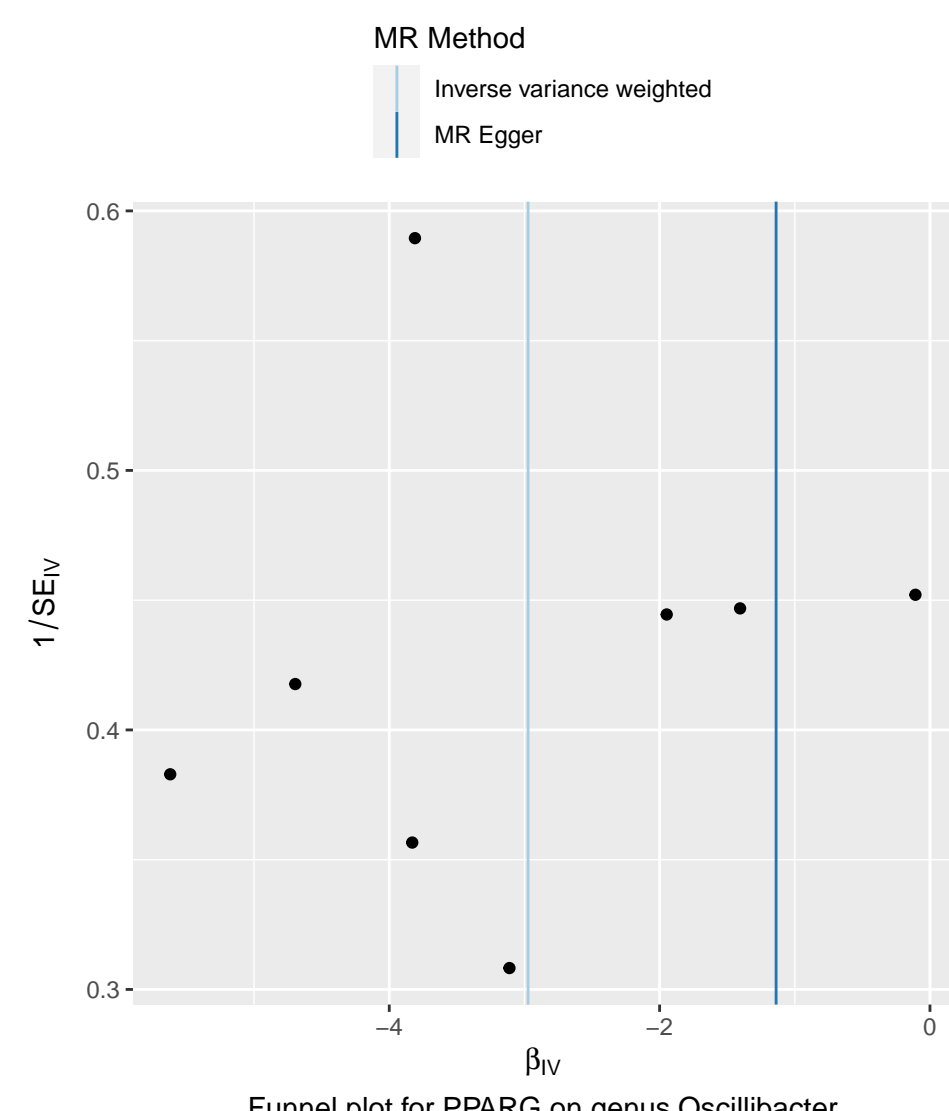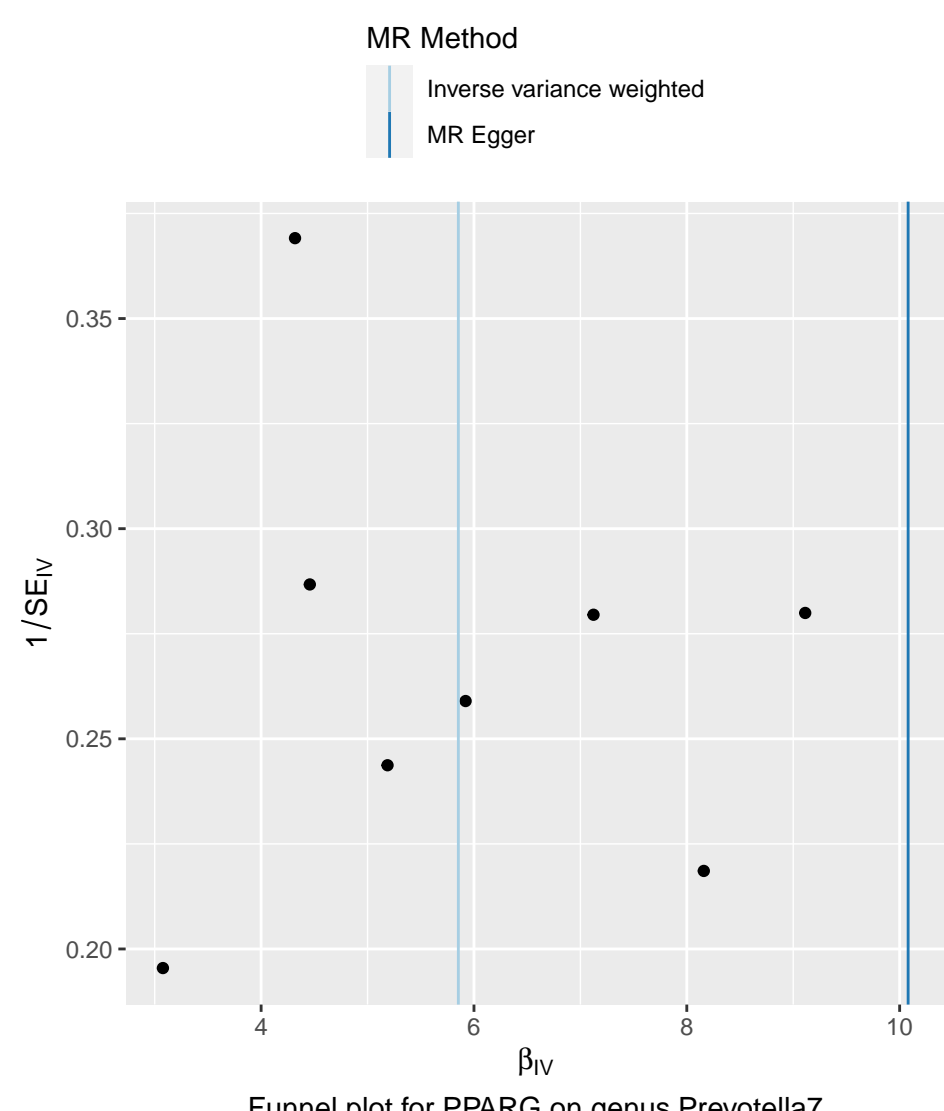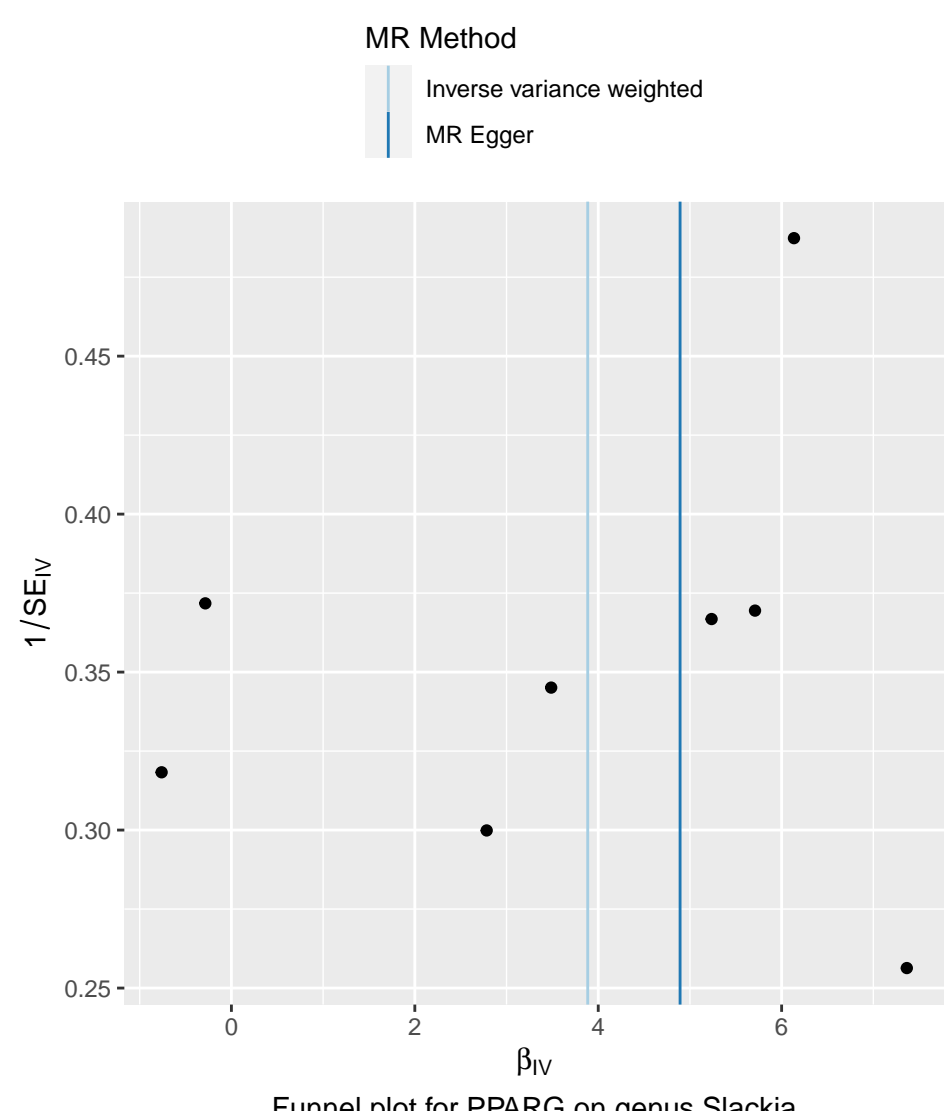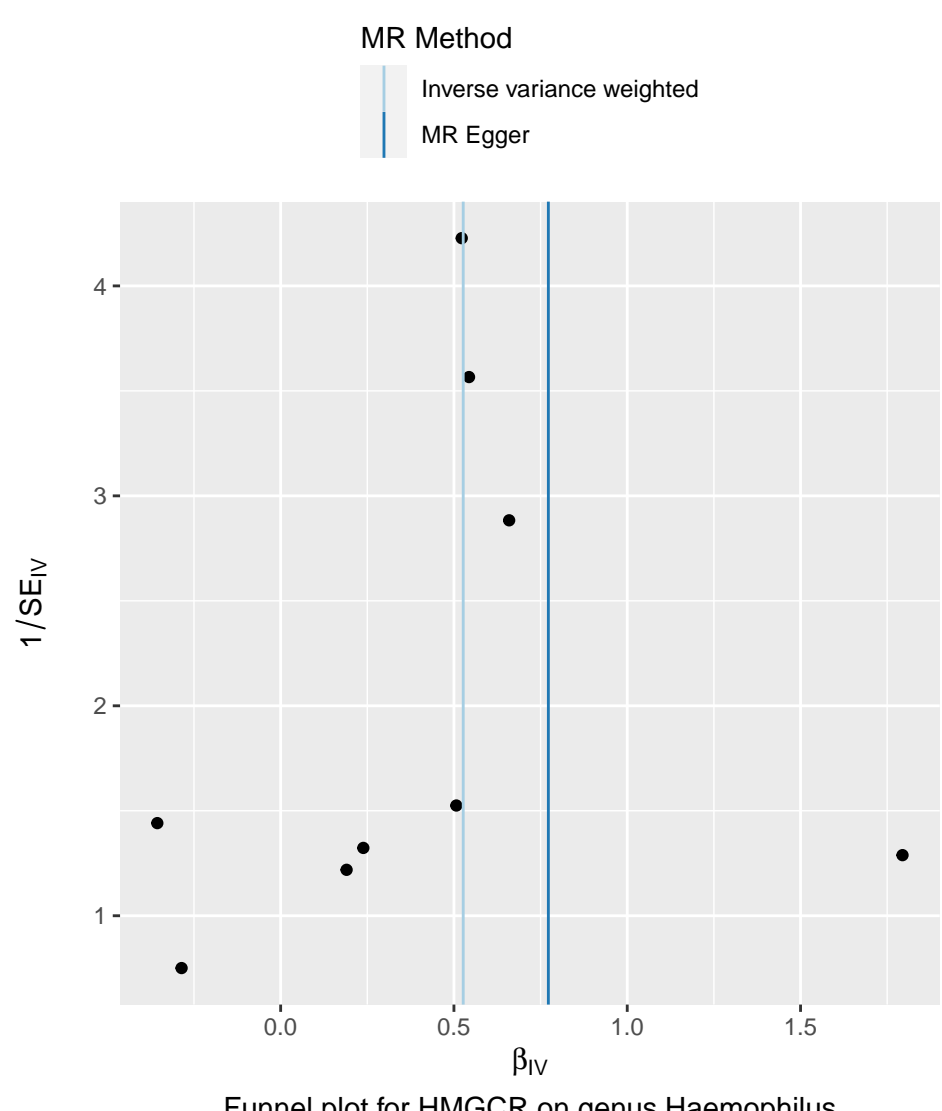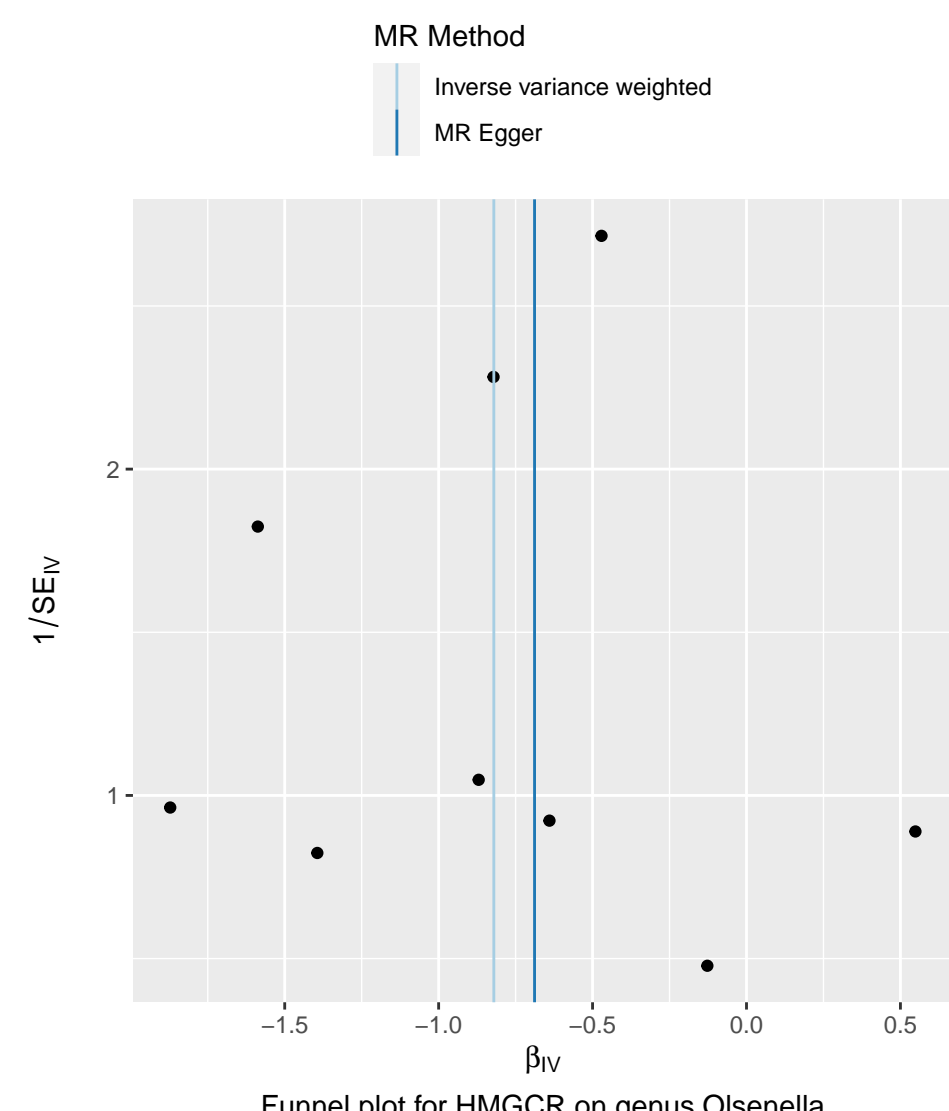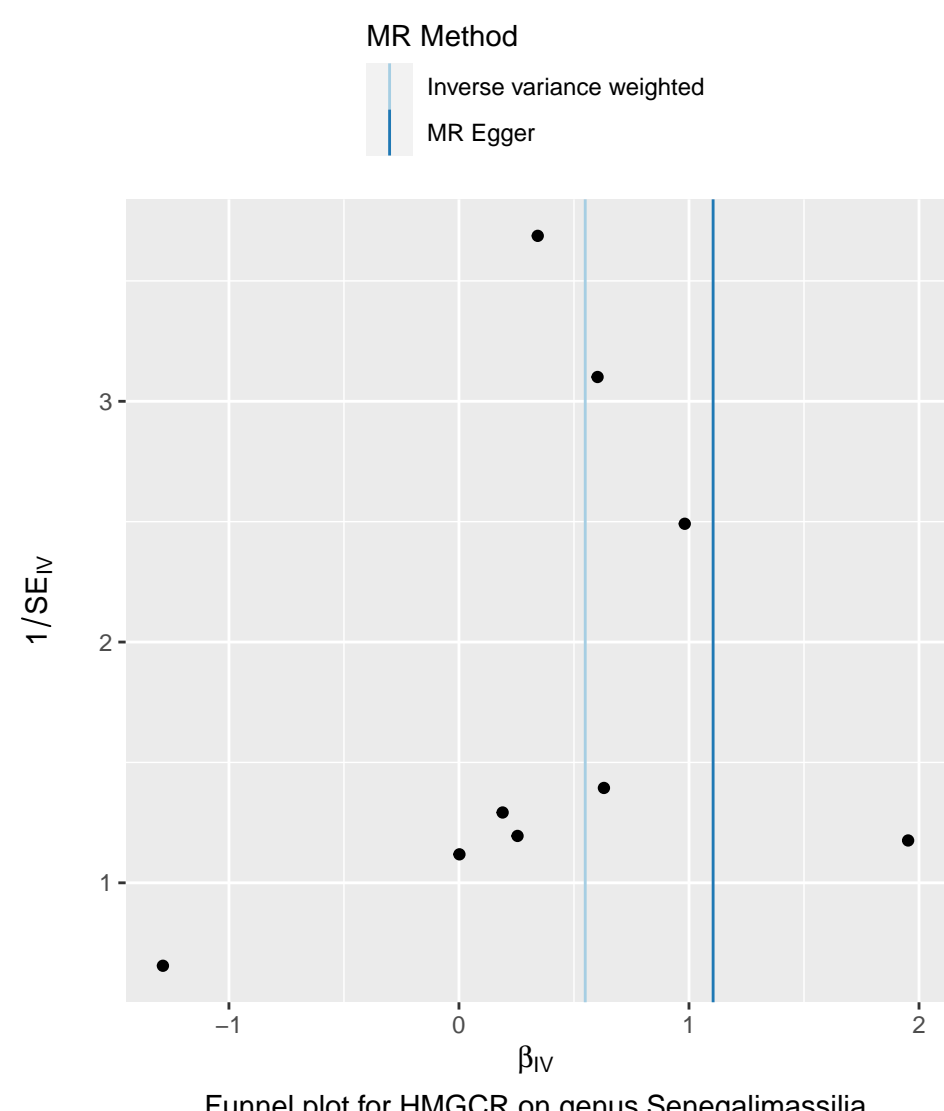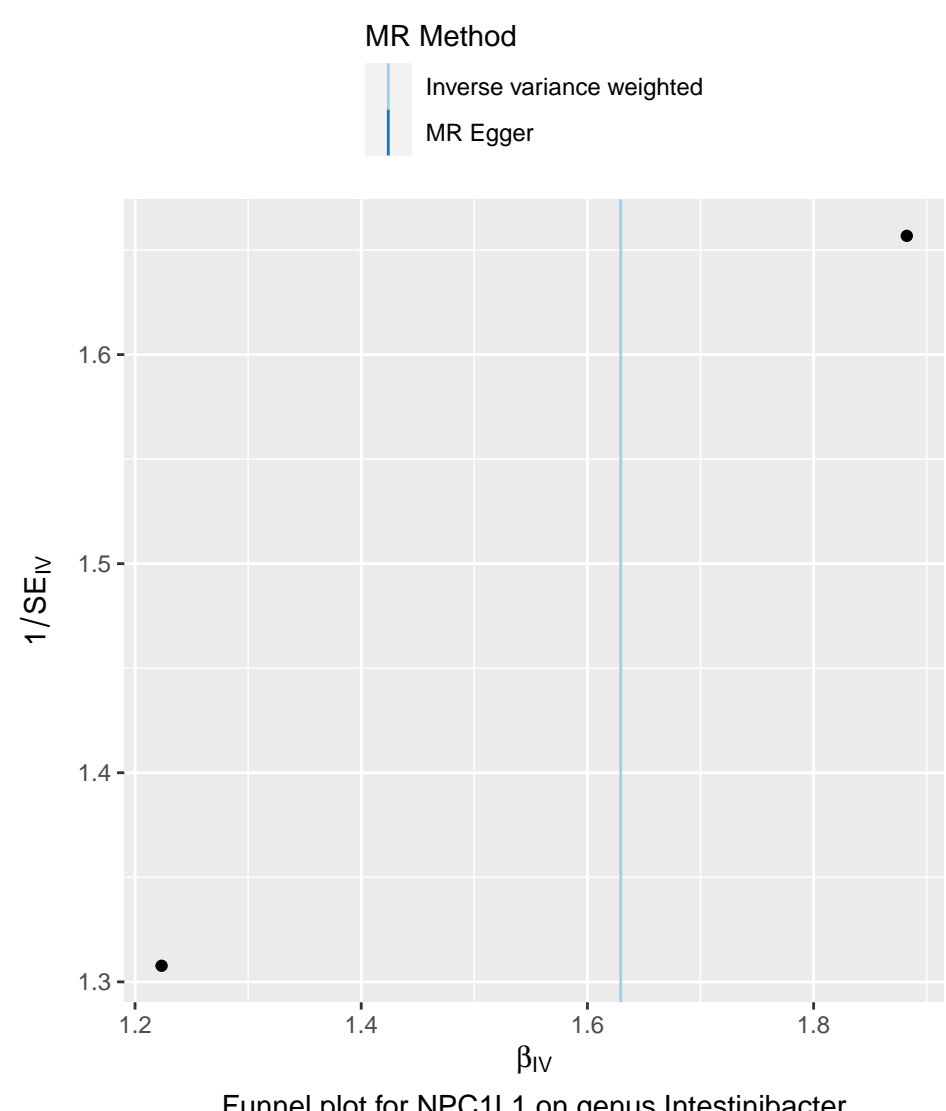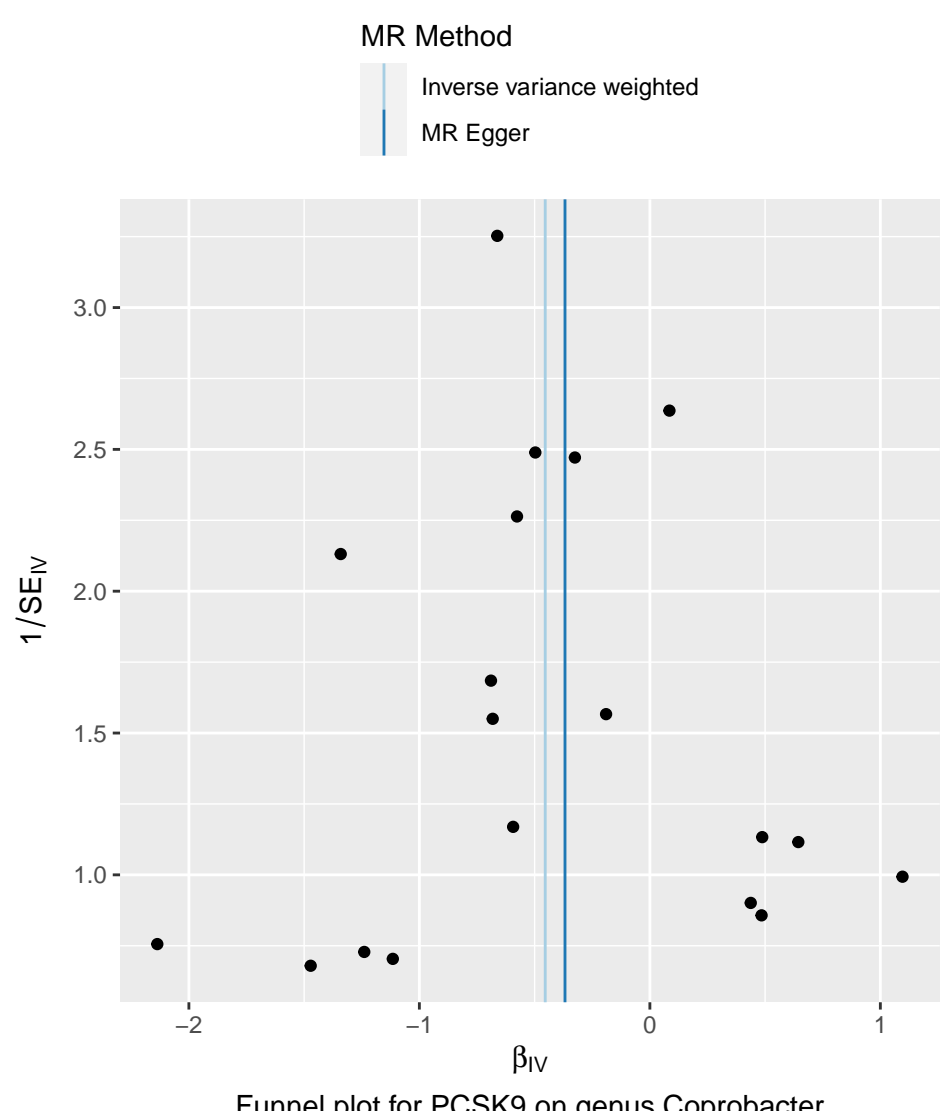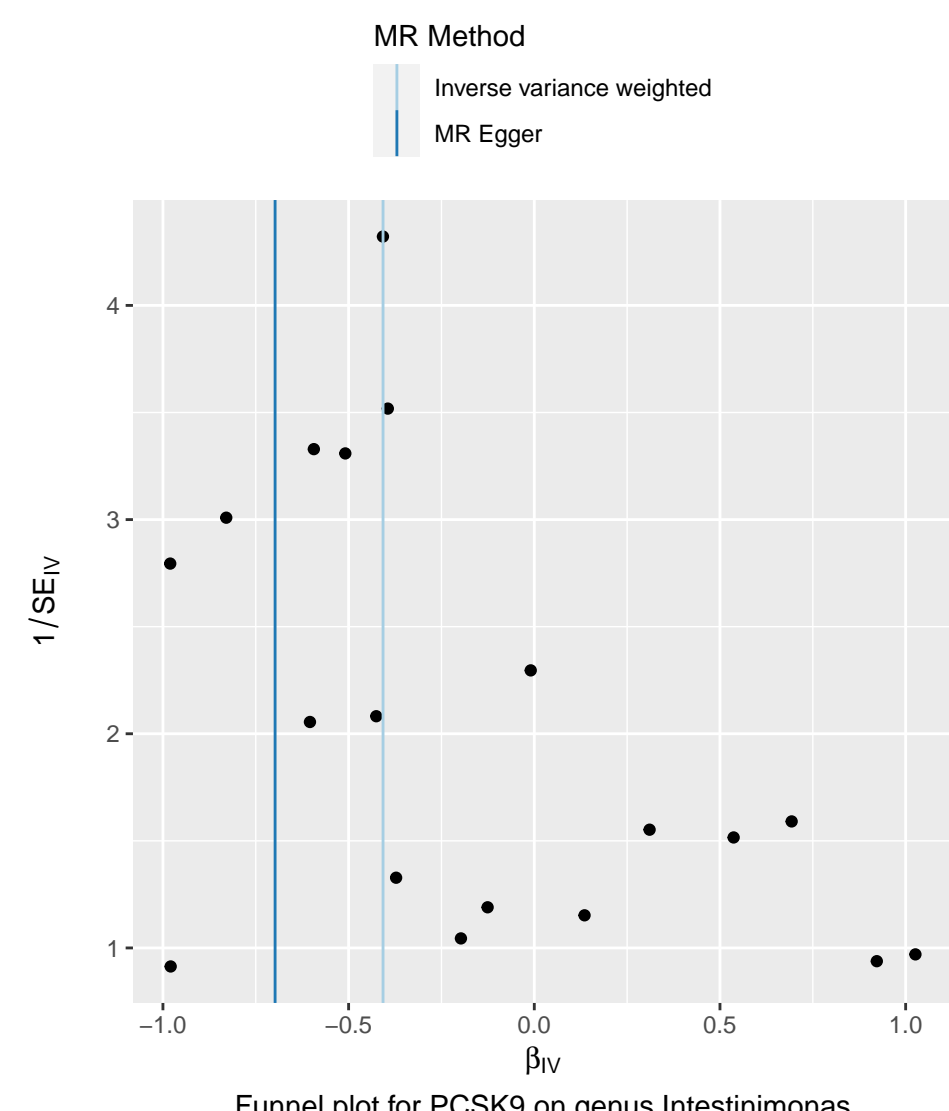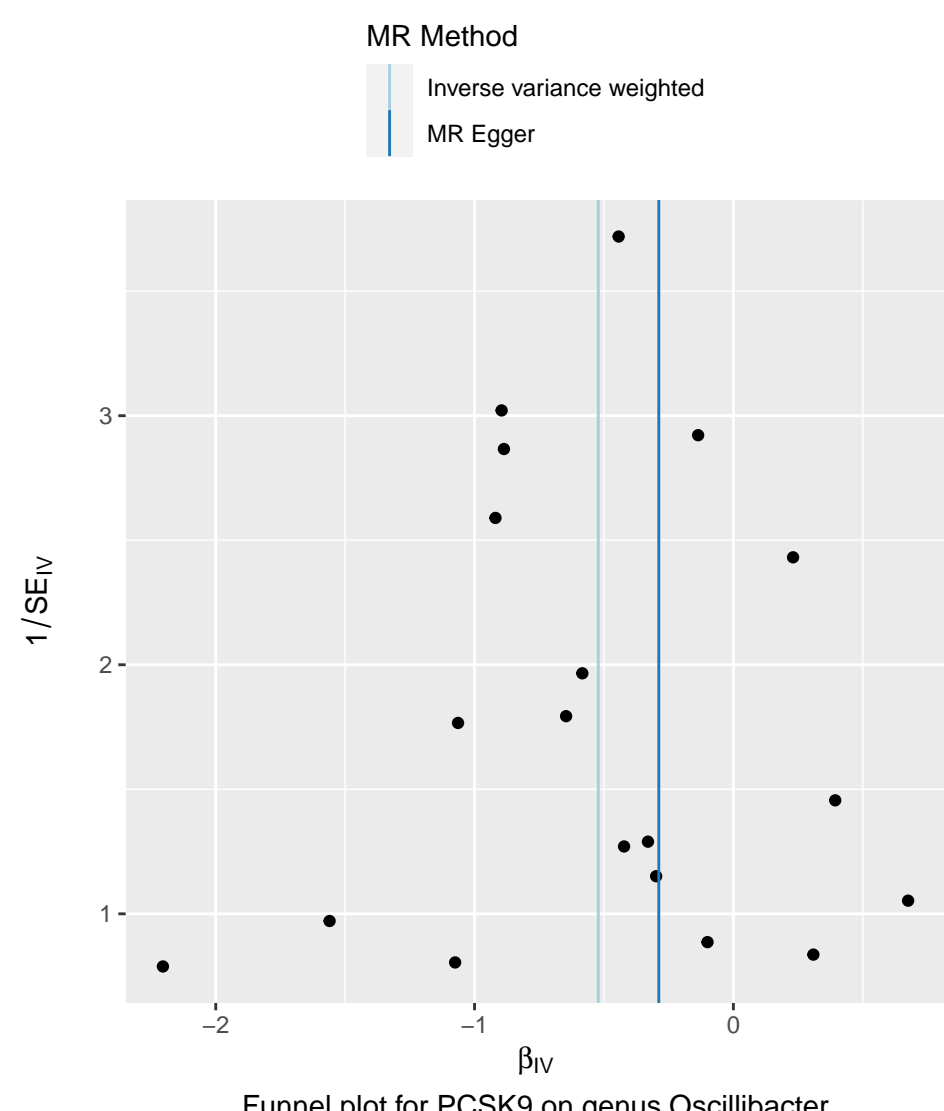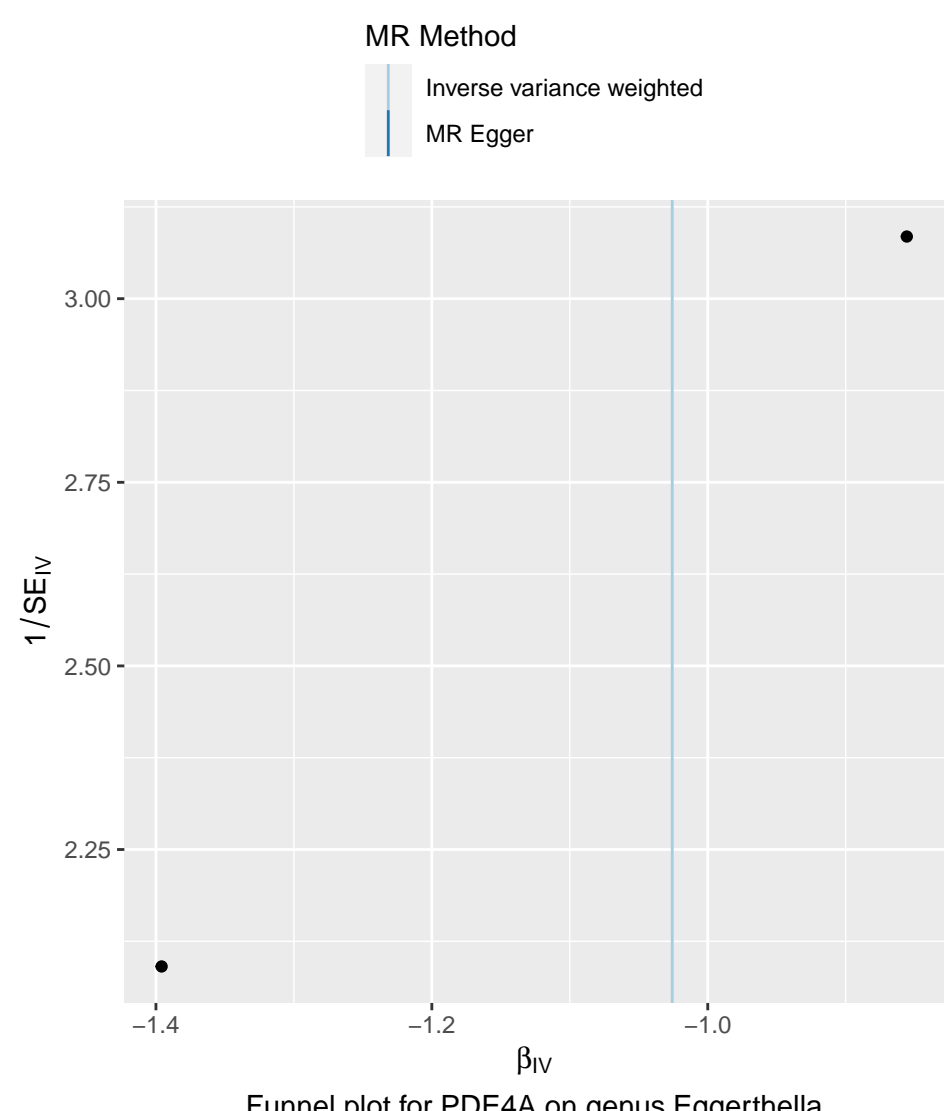

Supplement: mmc8.pdf [file mmc8.pdf]

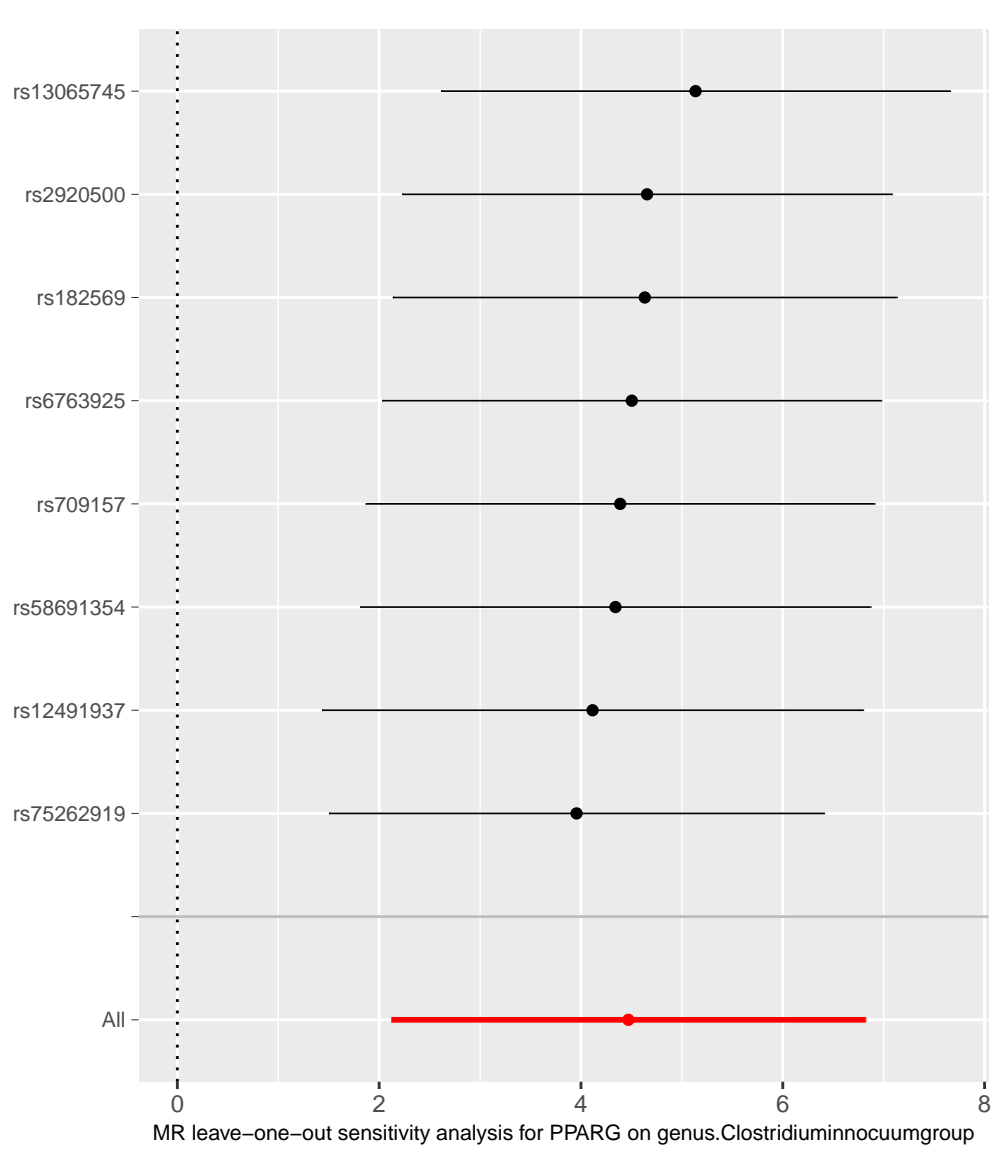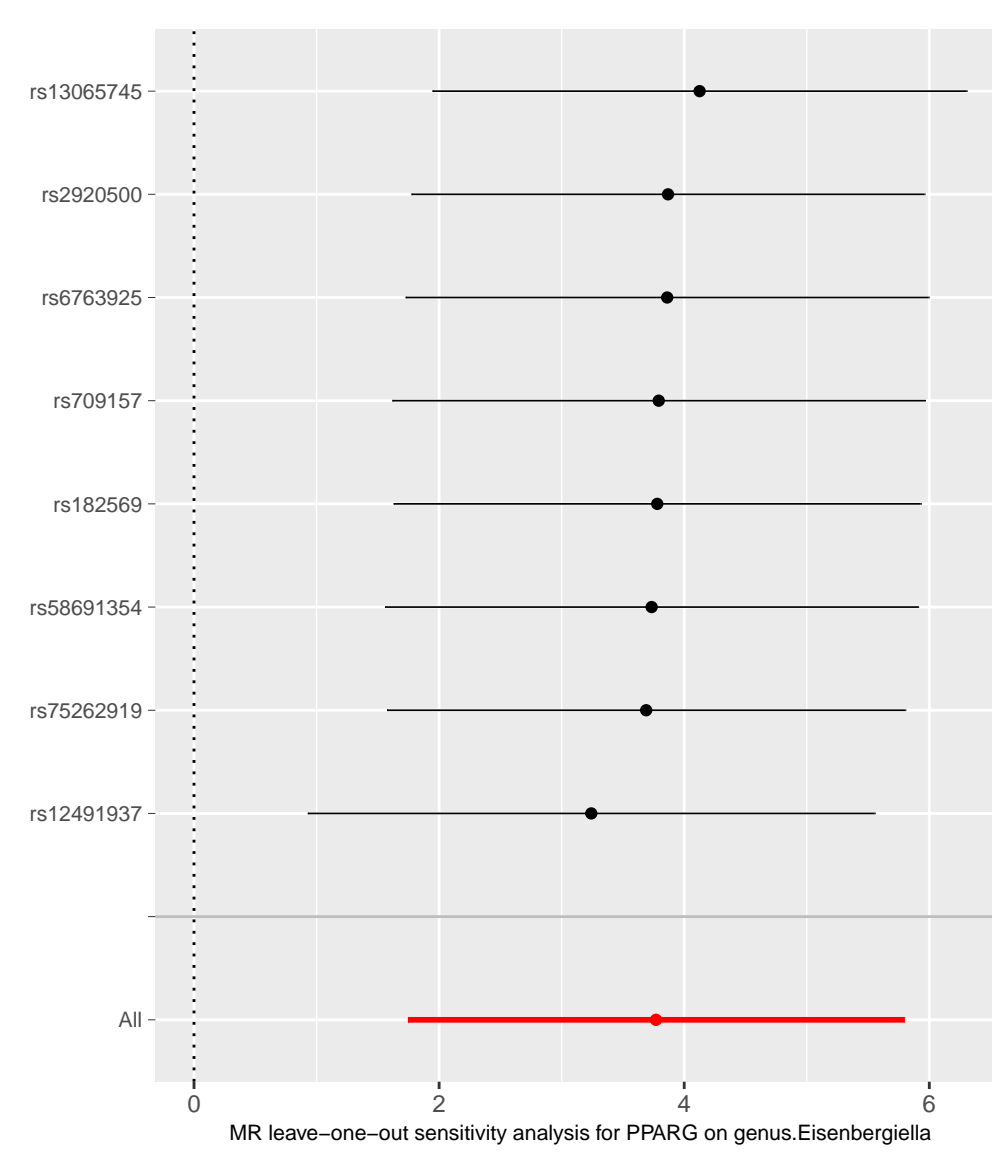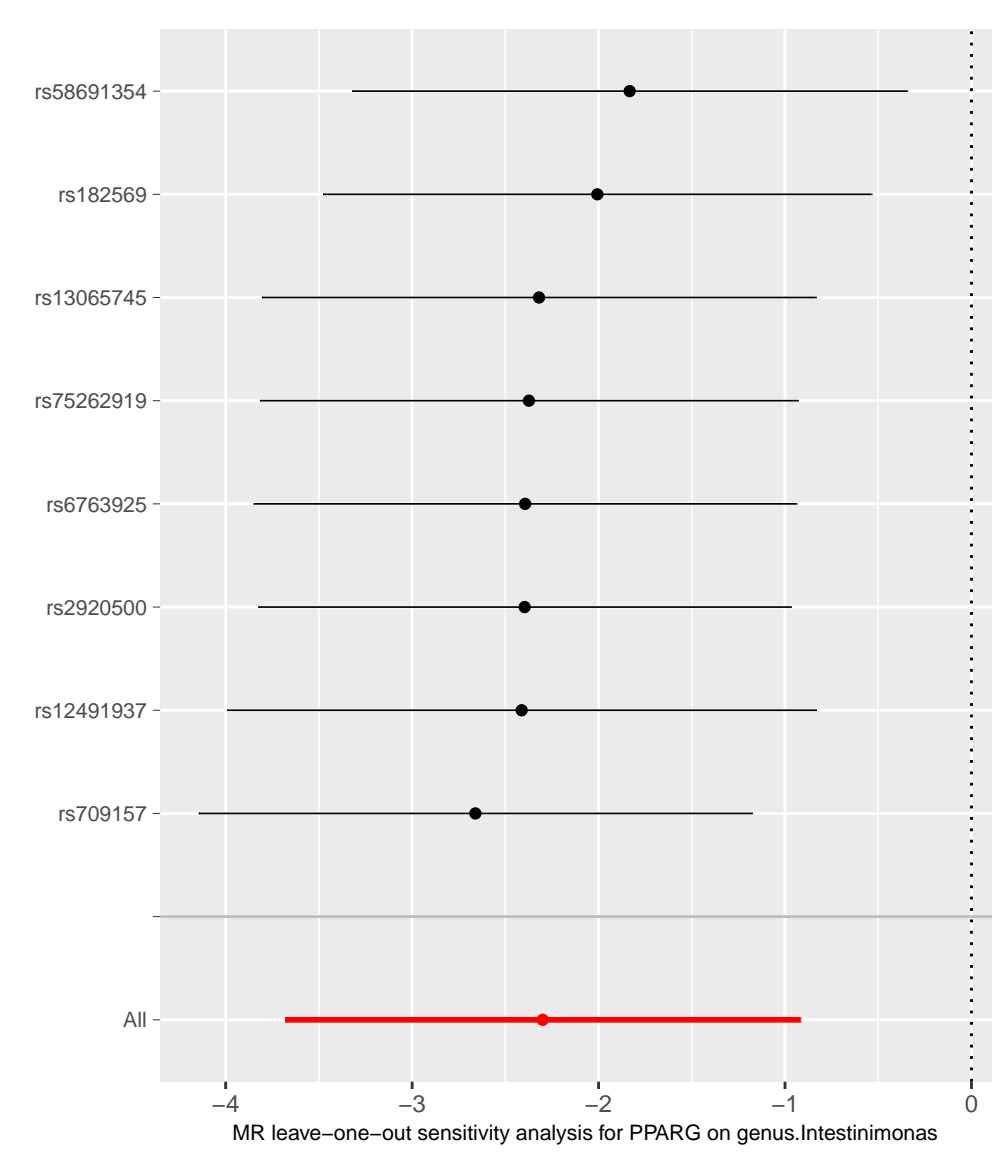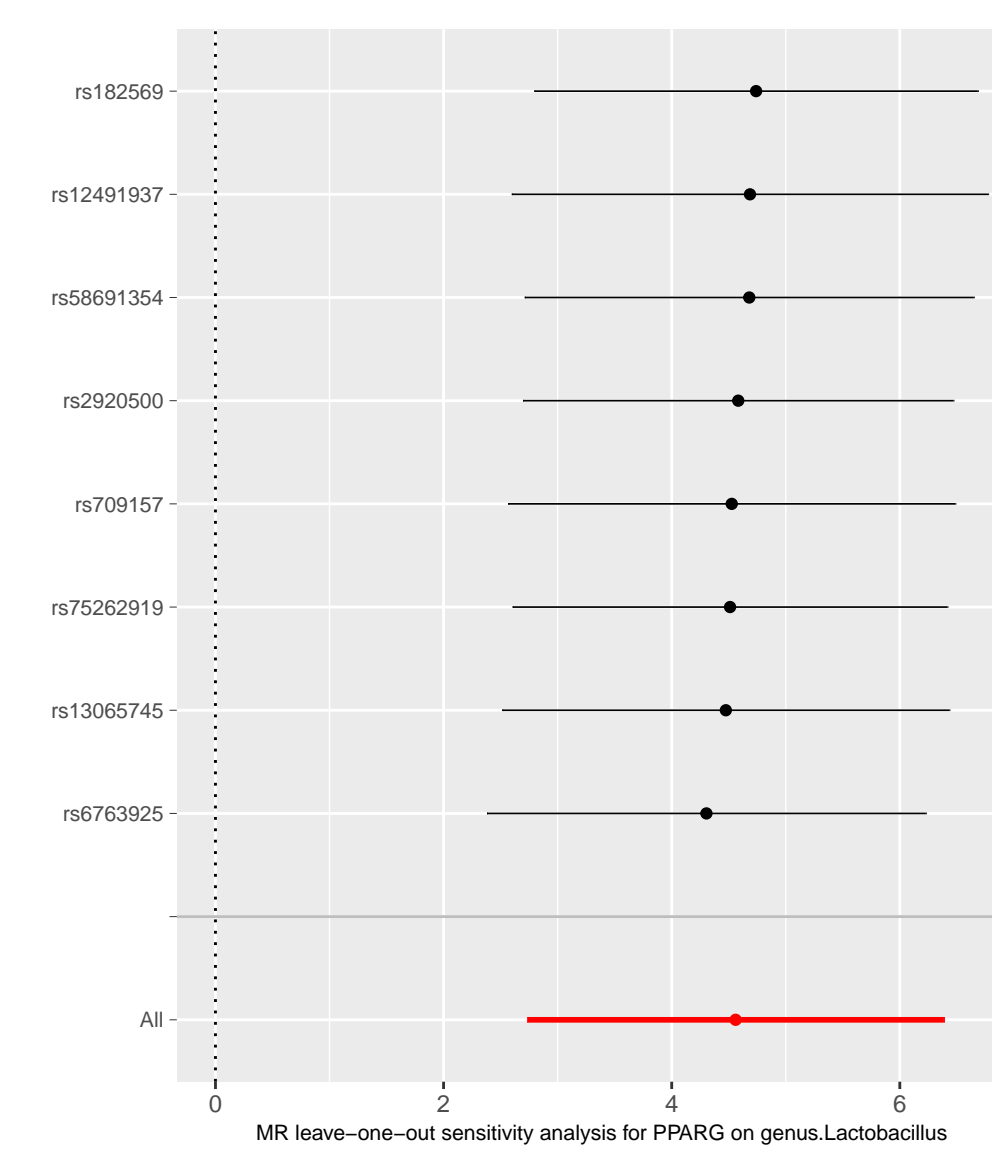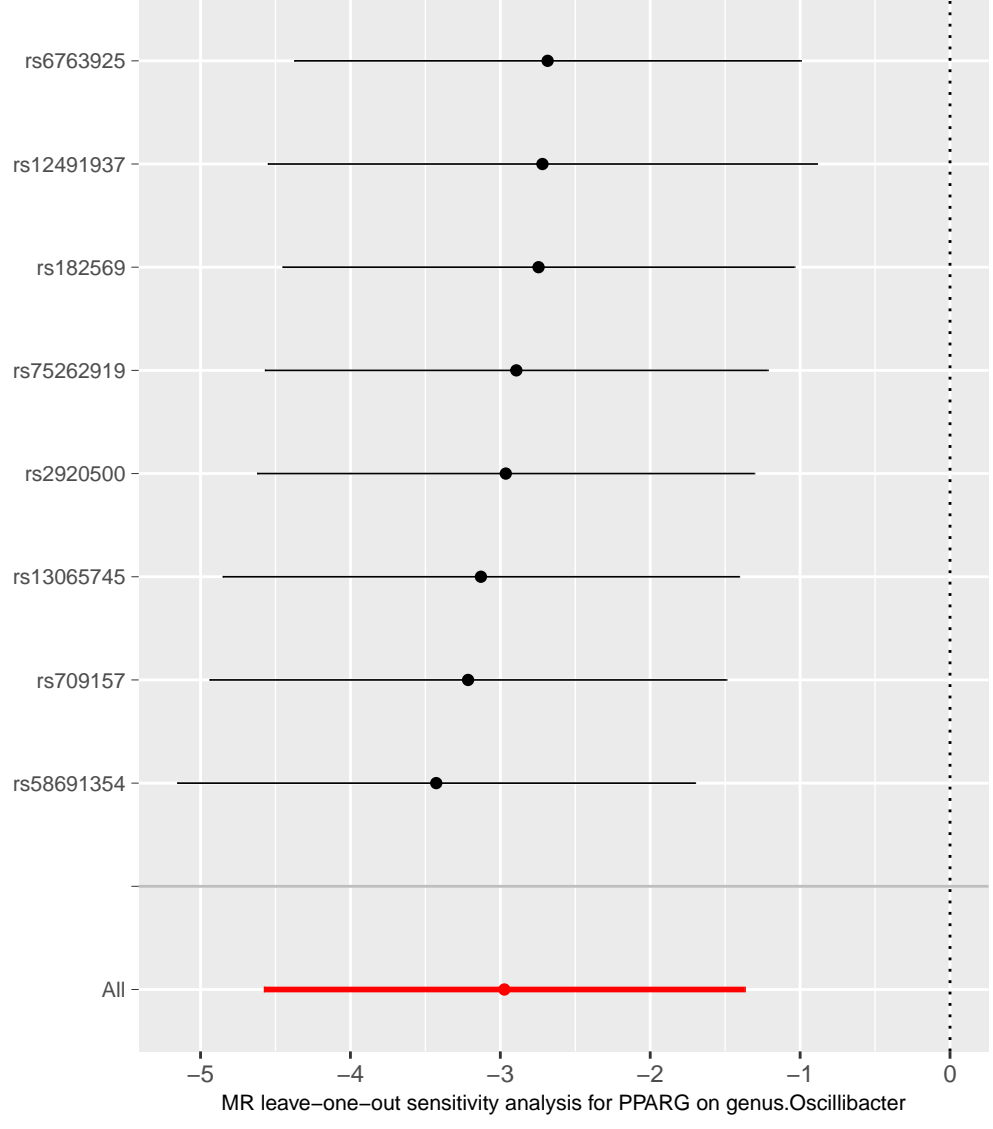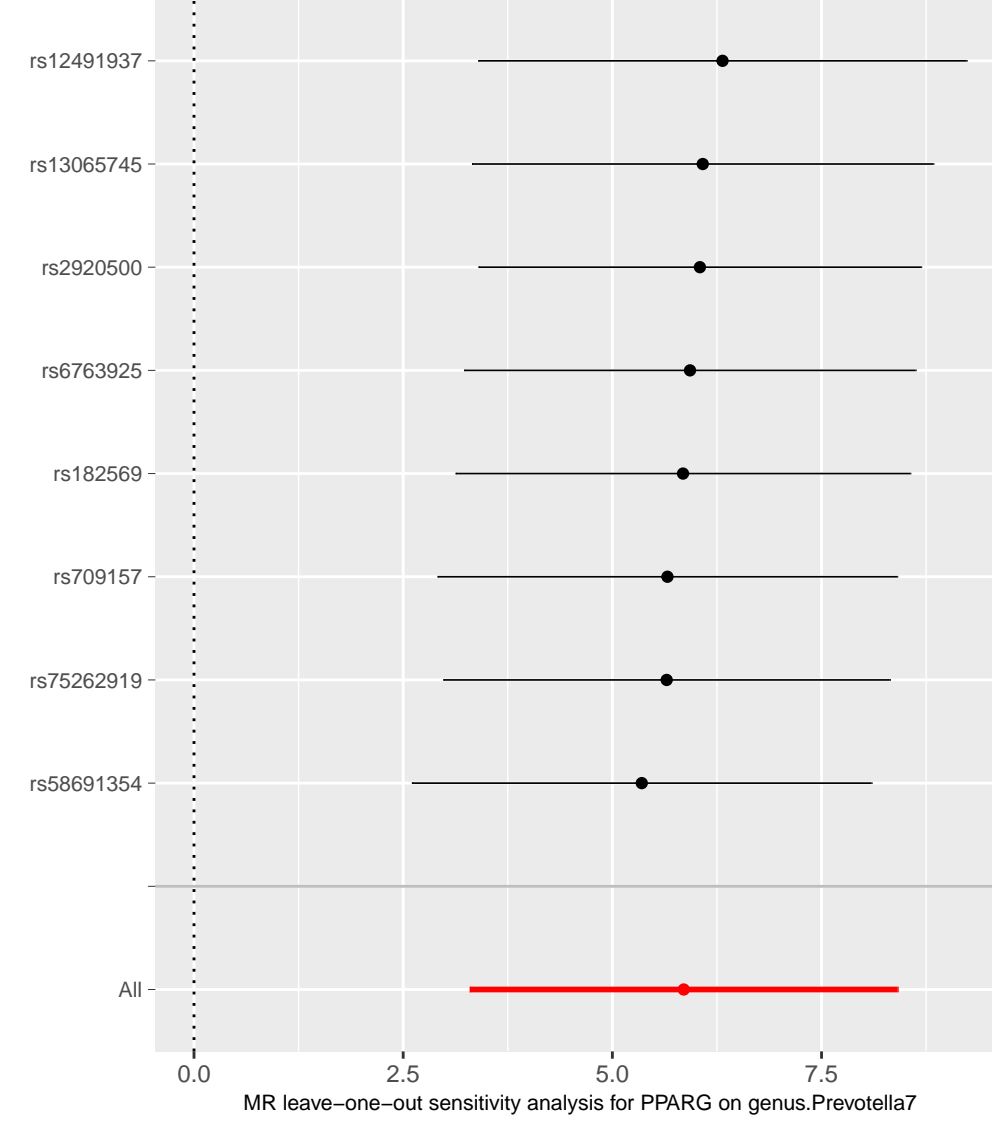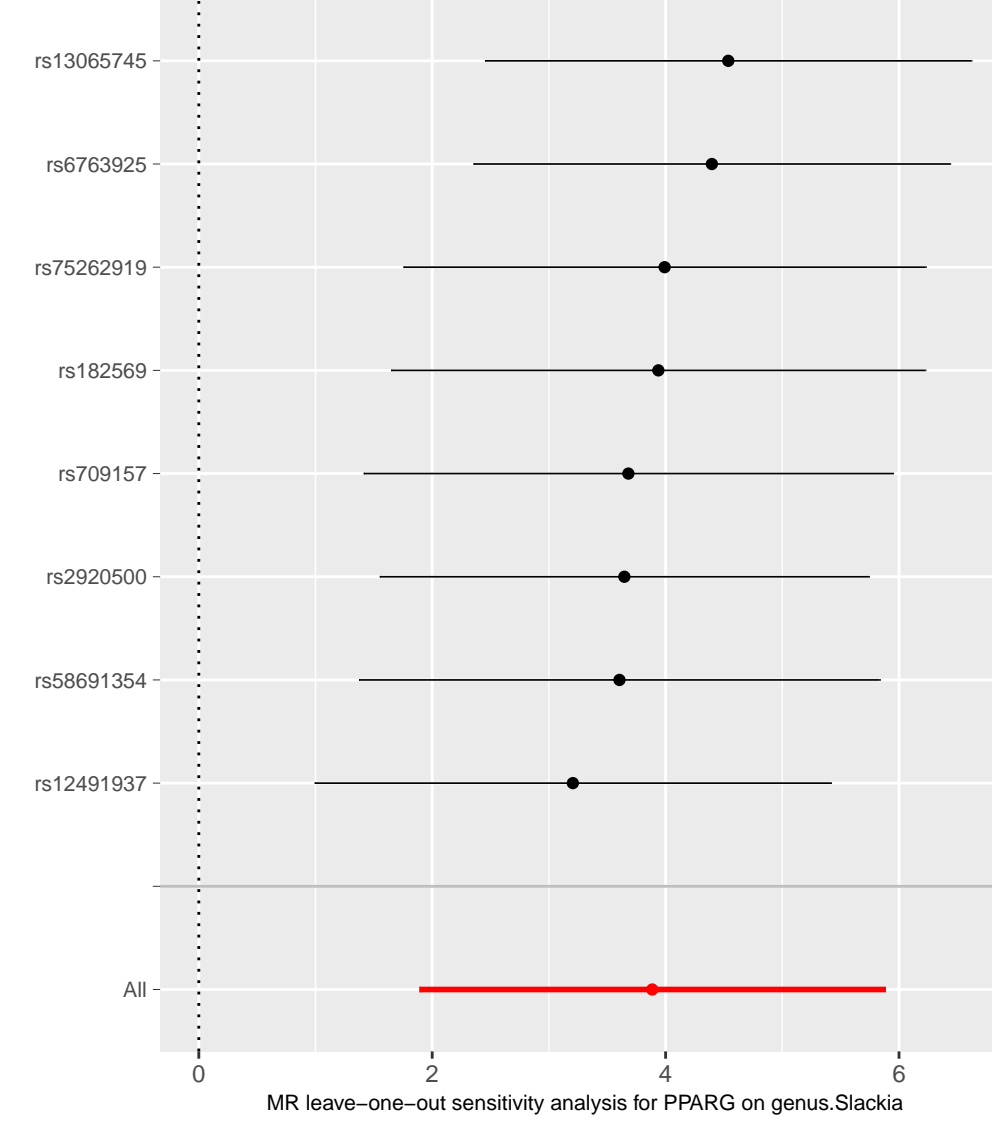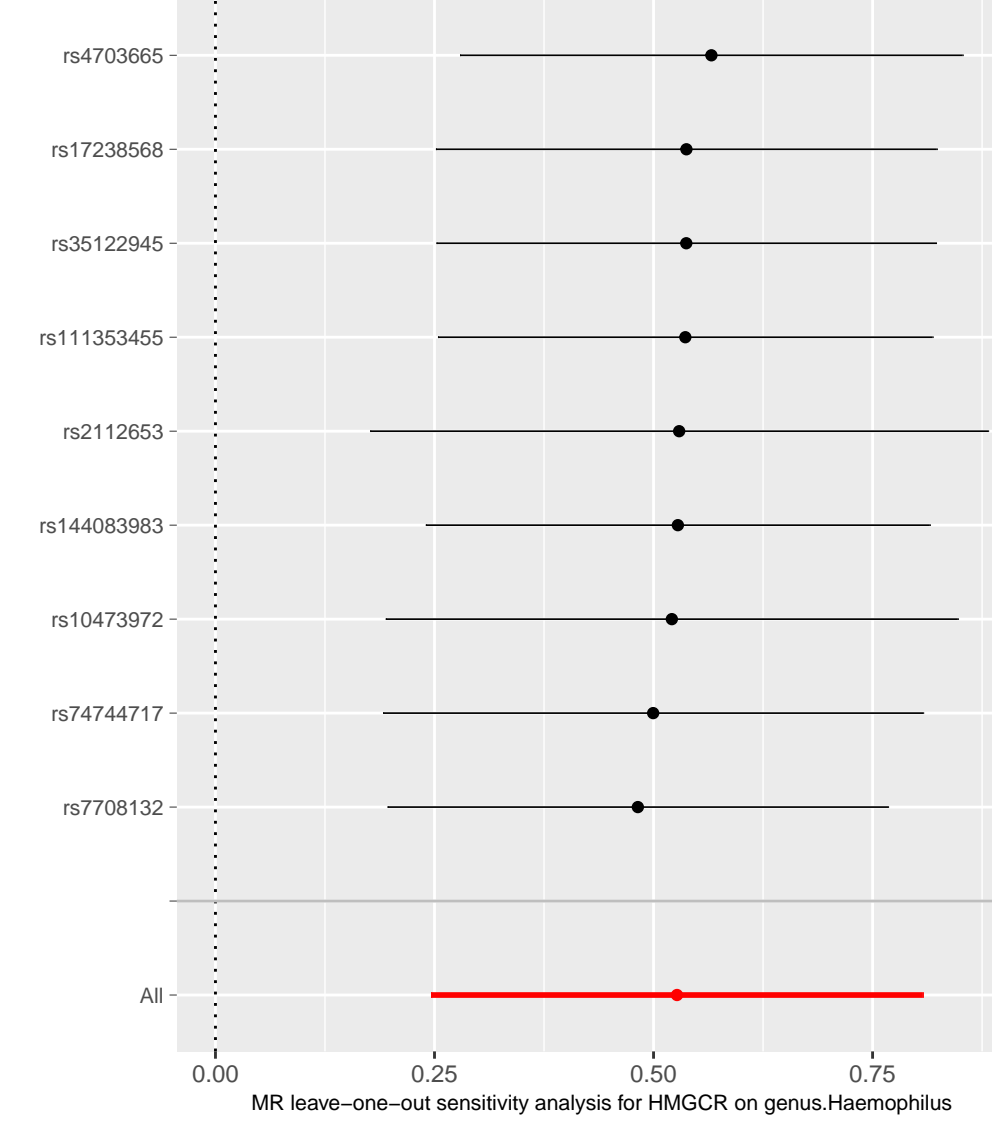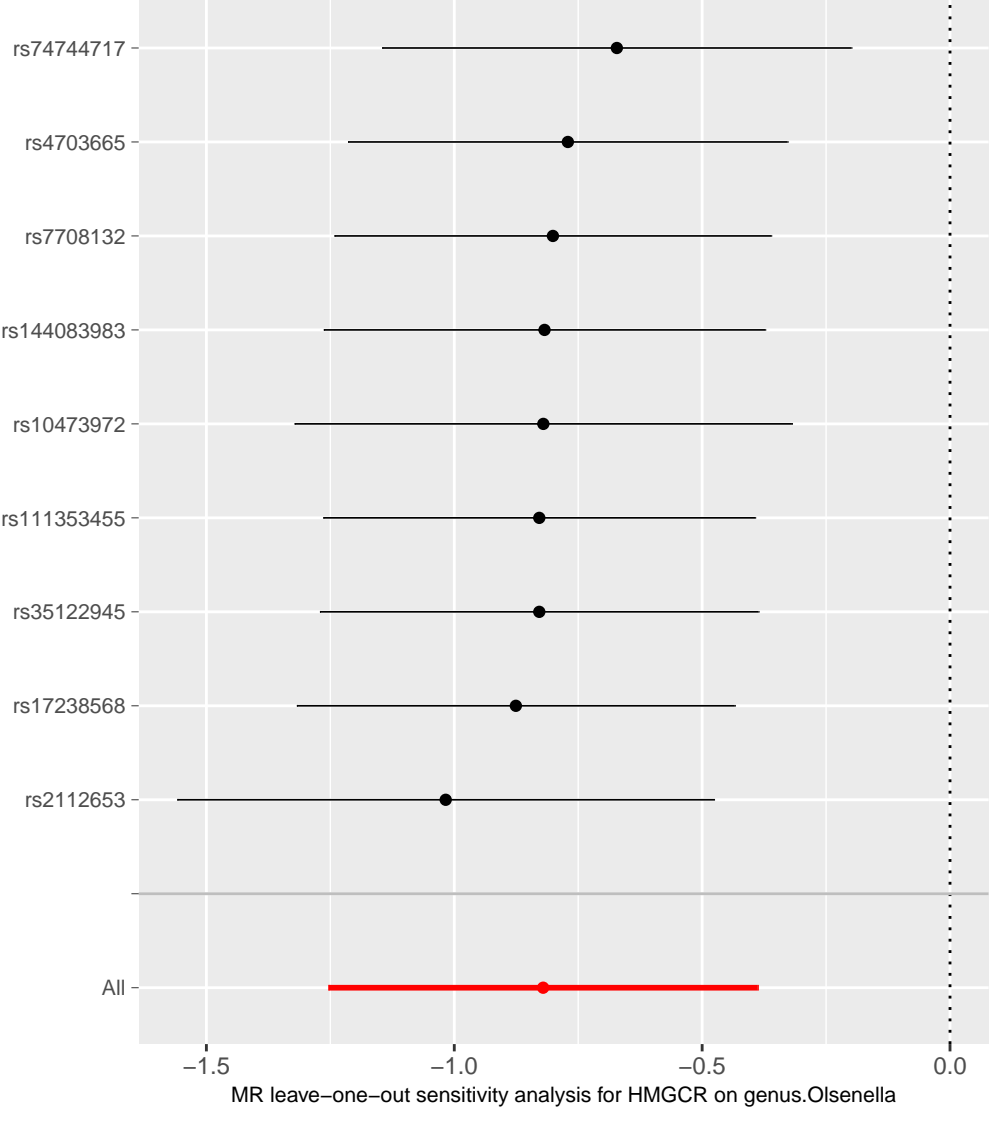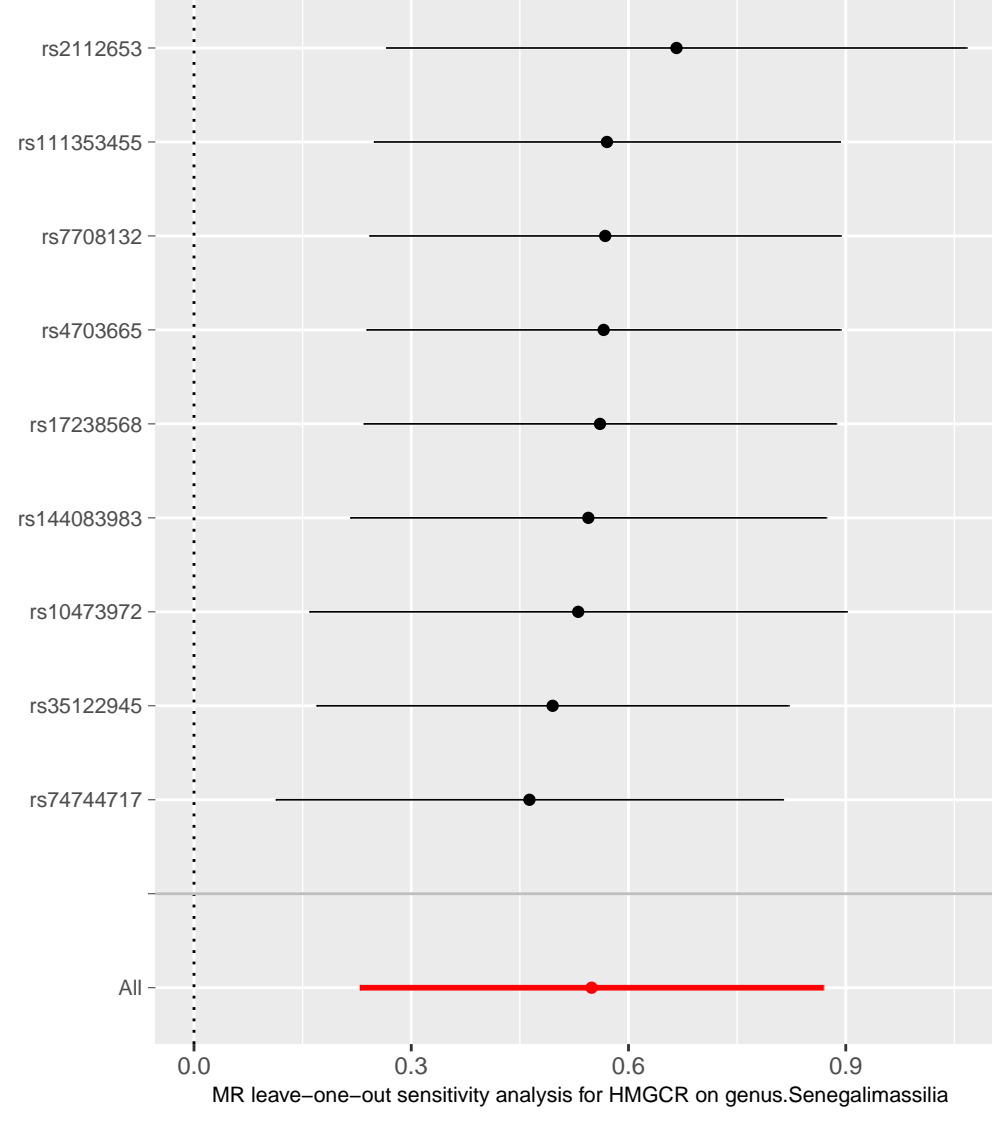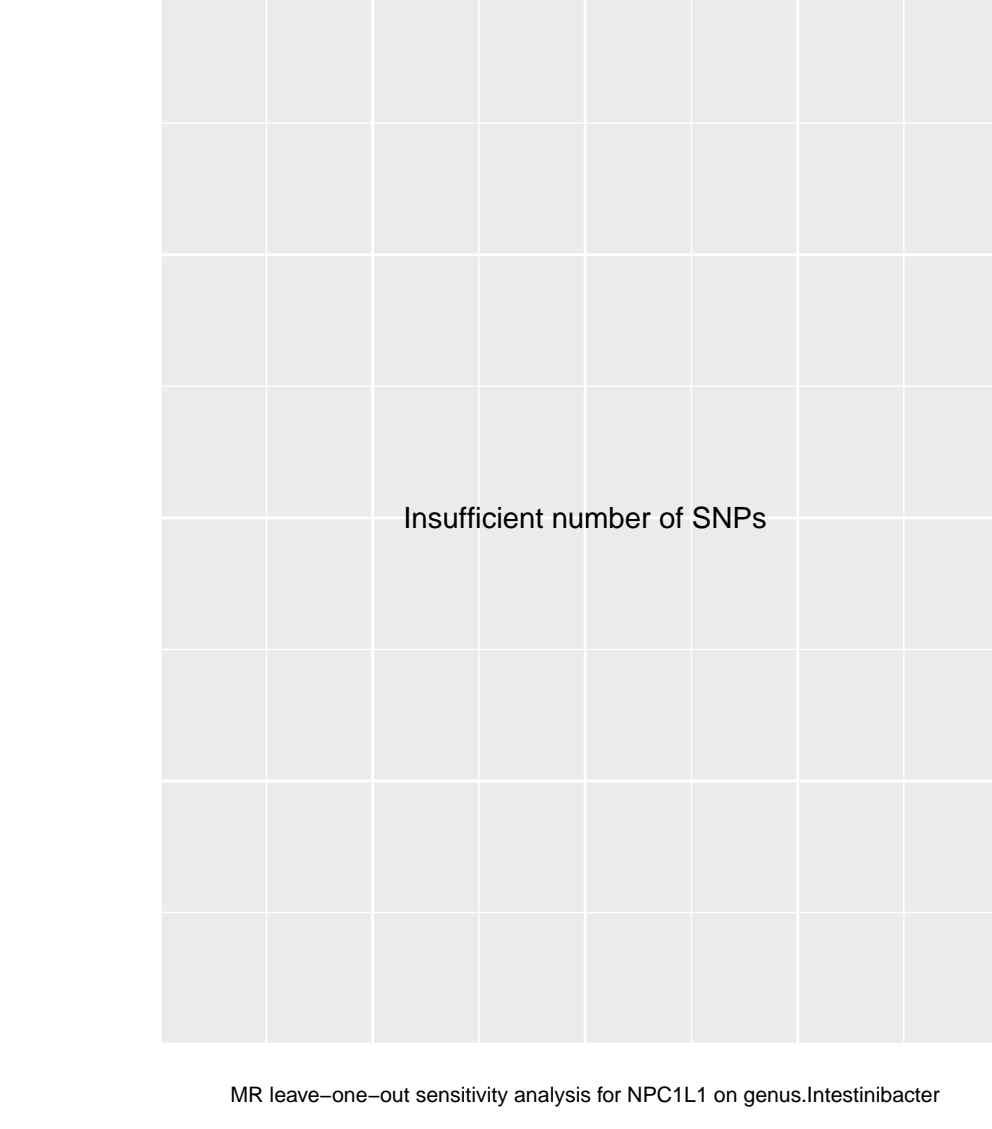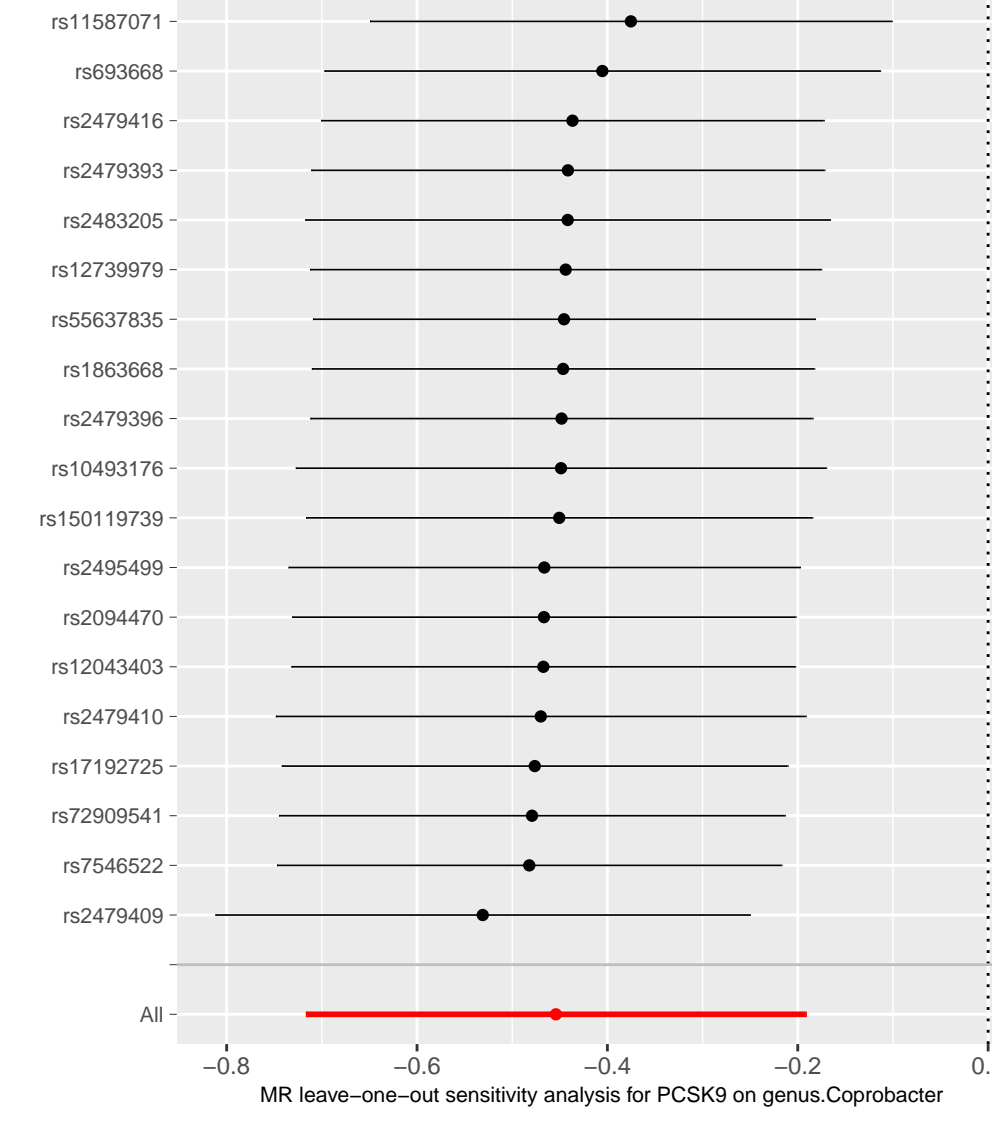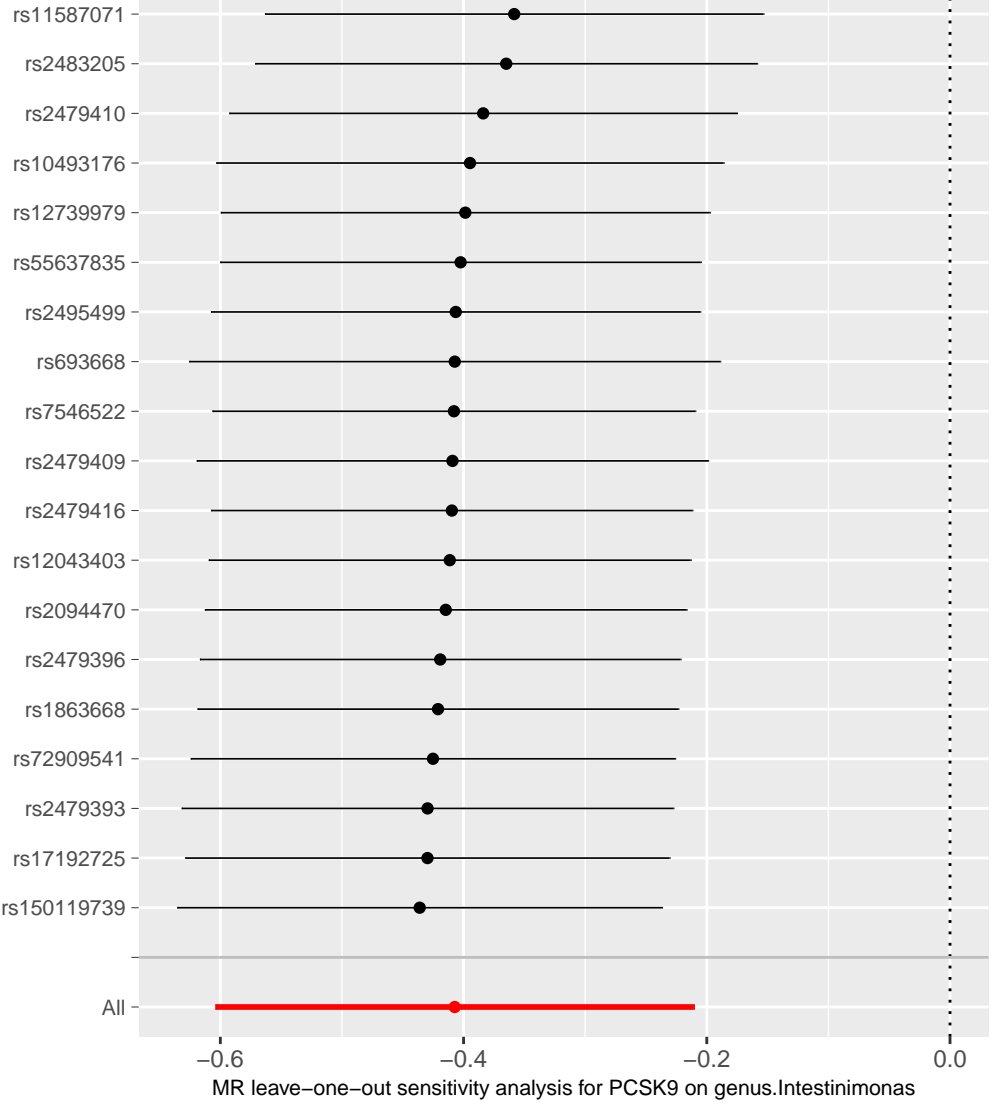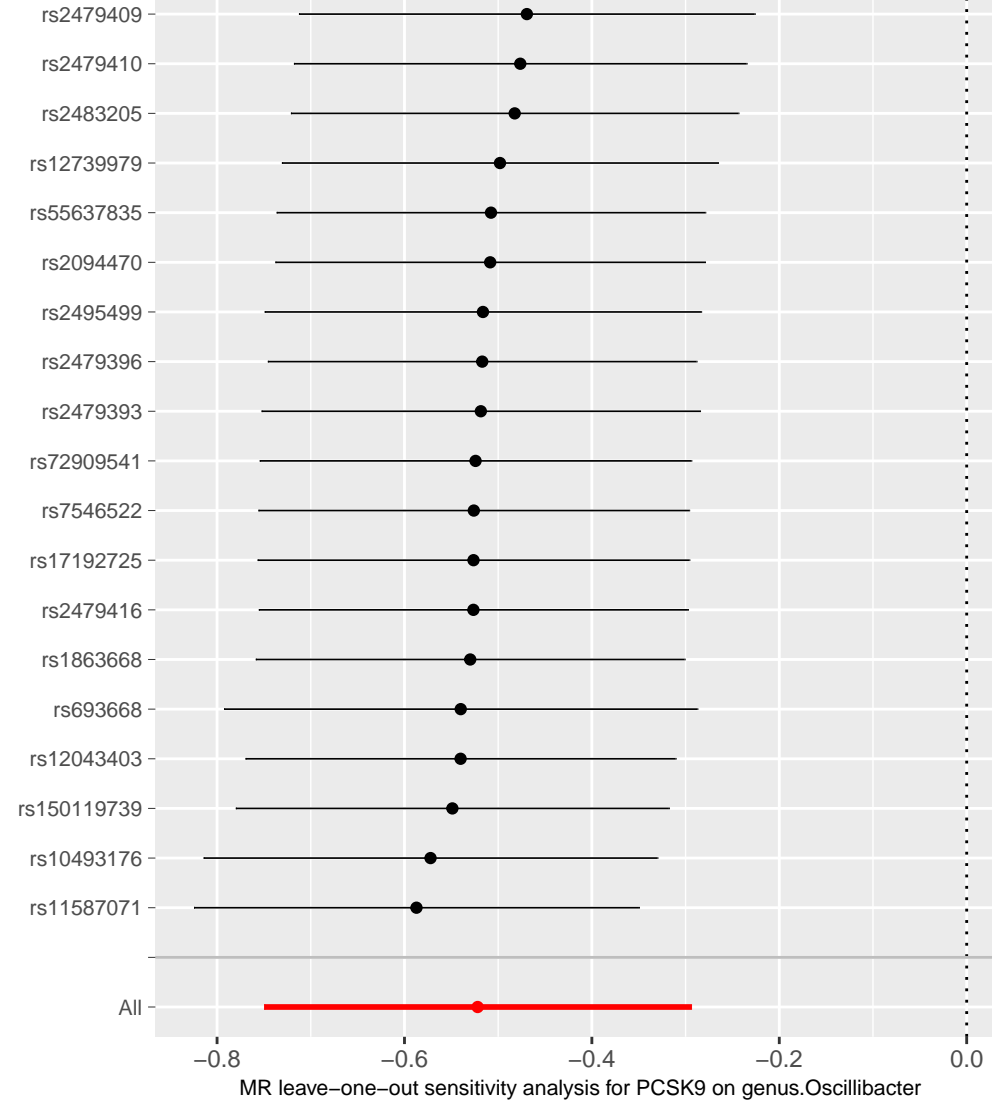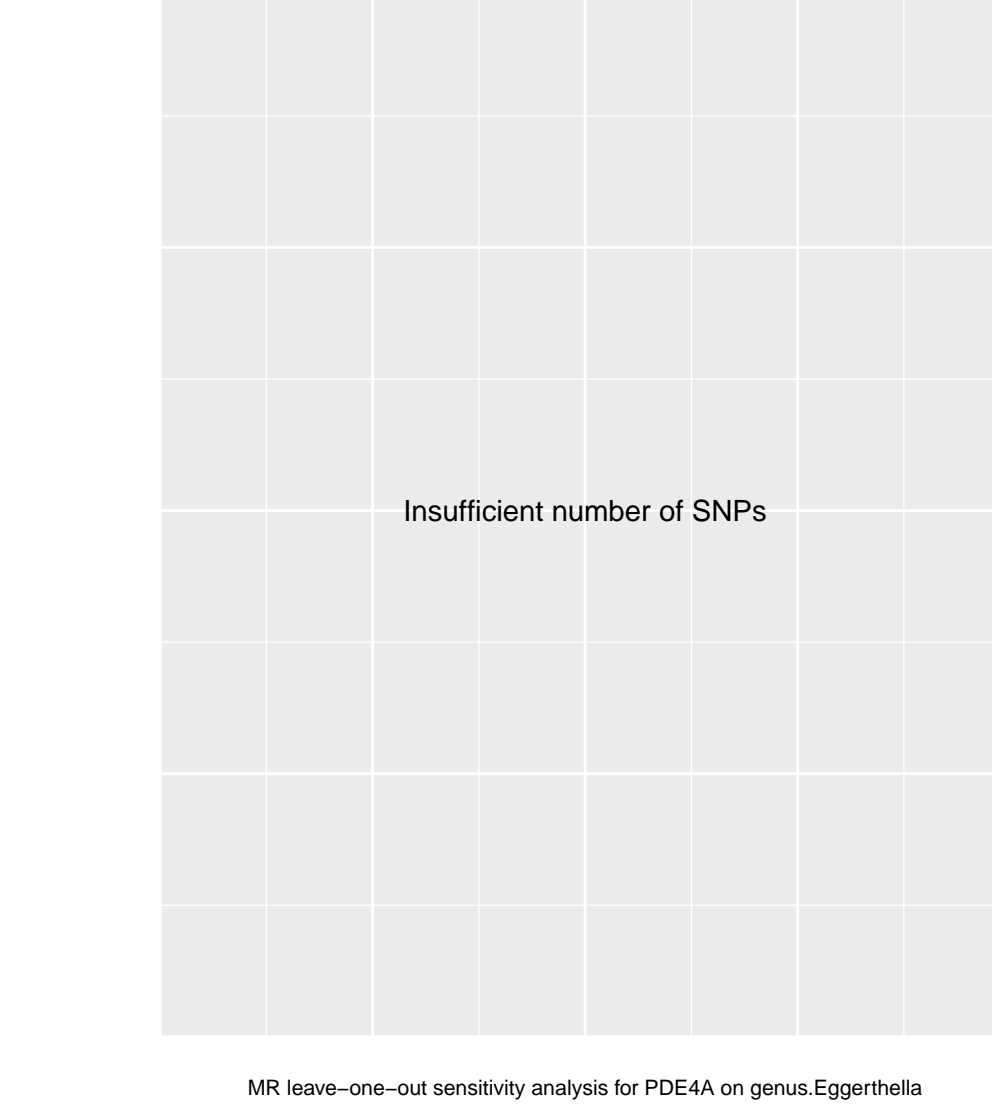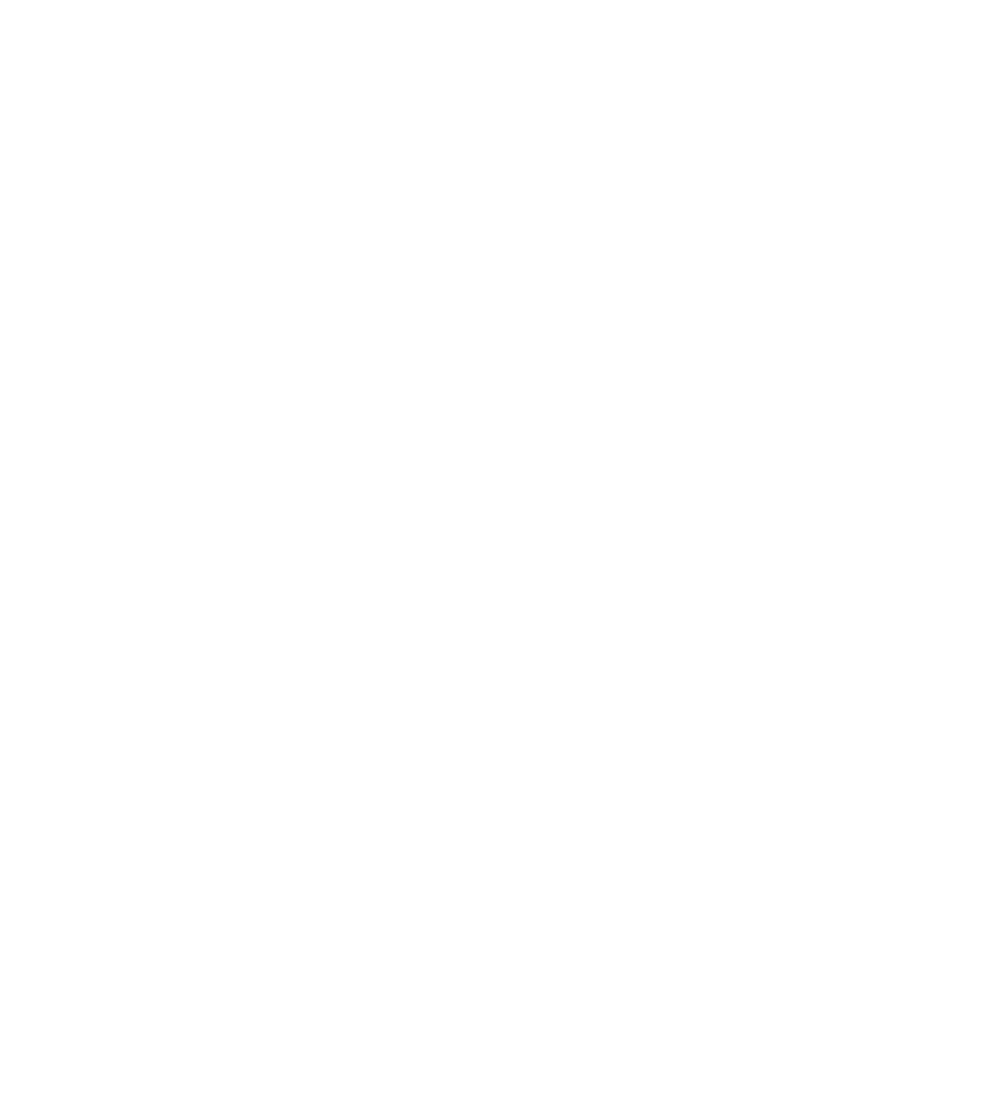

Supplement: mmc9.pdf [file mmc9.pdf]
